# Supplementary material for: Effects of position (α or β) and linker heteroatom (O or S) of substituent on the photophysicochemical behavior of poly(oxyethylene) substituted ZnPcs and assessment of J-aggregation or protonation using TD-DFT computations
Source: Royal Society of Chemistry journal article supplement (doi:10.1039/c3dt51549d), 2013-01-01
Supplement: c3dt51549d.pdf [file c3dt51549d.pdf]

## Supplementary Information

### 5 **Effects of position ( $\alpha$ or $\beta$ ) and linker heteroatom (O or S) of substituent on the photophysical behavior of poly(oxyethylene) substituted ZnPcs and assessment of J-aggregation or protonation using TD-DFT computations**

10

**Mehmet Menaf Ayhan<sup>[a]</sup>, Gül Altınbaş Özpınar<sup>[b],\*</sup>, Mahmut Durmuş<sup>[a]</sup>, Ayşe Gül Gürek<sup>[a],\*</sup>**

[a] Dr.M.M. Ayhan, Dr. M. Durmuş, Prof. A.G. Gürek

15 Department of Chemistry, Gebze Institute of Technology, PO Box 141, Gebze, 41400, Kocaeli, Turkey

[b] Dr. G. A. Özpınar

20 Department of Chemistry Technology, Biga Vocational School, Çanakkale Onsekiz Mart University, Biga 17200 Çanakkale, Turkey

25

30

35

40

## Table of Contents

|    |                                                                                                                                                           |     |
|----|-----------------------------------------------------------------------------------------------------------------------------------------------------------|-----|
|    | <b>Figure S1.</b> ESI-MS mass spectra of compounds <b>6a</b> (A), <b>7a</b> (B) and <b>7b</b> (C).....                                                    | S4  |
|    | <b>Figure S2.</b> <sup>1</sup> H NMR (in CDCl <sub>3</sub> ) Spectrum of <b>6a</b> .....                                                                  | S5  |
| 5  | <b>Figure S3.</b> <sup>13</sup> C NMR (in CDCl <sub>3</sub> ) Spectrum of <b>6a</b> .....                                                                 | S5  |
|    | <b>Figure S4.</b> <sup>1</sup> H NMR (in CDCl <sub>3</sub> ) Spectrum of <b>7a</b> .....                                                                  | S6  |
|    | <b>Figure S5.</b> <sup>13</sup> C NMR (in CDCl <sub>3</sub> ) Spectrum of <b>7a</b> .....                                                                 | S6  |
|    | <b>Figure S6.</b> <sup>1</sup> H NMR (in CDCl <sub>3</sub> ) Spectrum of <b>7b</b> .....                                                                  | S7  |
|    | <b>Figure S7.</b> <sup>13</sup> C NMR (in CDCl <sub>3</sub> ) Spectrum of <b>7b</b> .....                                                                 | S7  |
| 10 | <b>Photophysical and photochemical parameters</b> .....                                                                                                   | S8  |
|    | <b>Figure S8.</b> Absorption spectra of <b>6a</b> in different solvents. Concentration ~ 5.0x10 <sup>-6</sup> M.....                                      | S9  |
|    | <b>Figure S9.</b> Absorption spectra of <b>6b</b> in different solvents. Concentration ~ 5.0x10 <sup>-6</sup> M....                                       | S10 |
|    | <b>Figure S10.</b> Absorption spectra of <b>7b</b> in different solvents. Concentration ~ 5.0x10 <sup>-6</sup> M...                                       | S10 |
|    | <b>Figure S11.</b> Absorption spectra of compound <b>6a</b> at different concentrations in DMSO....                                                       | S11 |
| 15 | <b>Figure S12.</b> Absorption spectra of compound <b>6b</b> at different concentrations in DMSO.....                                                      | S11 |
|    | <b>Figure S13.</b> Absorption spectra of compound <b>7a</b> at different concentrations in DMSO.....                                                      | S12 |
|    | <b>Figure S14.</b> Absorption spectra of compound <b>7b</b> at different concentrations in DMSO....                                                       | S12 |
|    | <b>Figure S15.</b> Absorption, fluorescence emission and excitation spectra for compound <b>6a</b> in..                                                   | S13 |
|    | DMSO. Excitation wavelengths = 660 nm.                                                                                                                    |     |
| 20 | <b>Figure S16.</b> Absorption, fluorescence emission and excitation spectra for compound <b>7a</b> ...                                                    | S13 |
|    | in DMSO. Excitation wavelengths = 675 nm.                                                                                                                 |     |
|    | <b>Figure S17.</b> Absorption, fluorescence emission and excitation spectra for compound <b>7b</b> ...                                                    | S14 |
|    | in DMSO. Excitation wavelengths = 675 nm                                                                                                                  |     |
|    | <b>Figure S18.</b> Absorption changes during the determination of singlet oxygen quantum.....                                                             | S14 |
| 25 | yield. This determination was for compound <b>6a</b> in DMSO at a concentration of 1x10 <sup>-5</sup> M.<br>(Inset: Plot of DPBF absorbance versus time). |     |
|    | <b>Figure S19.</b> Absorption changes during the determination of singlet oxygen quantum ....                                                             | S15 |
|    | Yield. This determination was for compound <b>6b</b> in DMSO at a concentration of 1x10 <sup>-5</sup> M.<br>(Inset: Plot of DPBF absorbance versus time). |     |
| 30 | <b>Figure S20.</b> Absorption changes during the determination of singlet oxygen quantum ...                                                              | S15 |
|    | yield. This determination was for compound <b>7a</b> in DMSO at a concentration of 1x10 <sup>-5</sup> M<br>(Inset: Plot of DPBF absorbance versus time).  |     |
|    | <b>Figure S21.</b> Absorption changes during the photodegradation studies of compound <b>6a</b> ....                                                      | S16 |

in DMSO showing the disappearance of the Q-band at 10 minutes intervals. Concentration  
~  $5.0 \times 10^{-6}$  M. (Inset: Plot of absorbance versus time).

**Figure S22.** Absorption changes during the photodegradation studies of compound **6b** .... S16

in DMSO showing the disappearance of the Q-band at 10 minutes intervals. Concentration  
~  $5.0 \times 10^{-6}$  M (Inset: Plot of absorbance versus time).

**Figure S23.** Absorption changes during the photodegradation studies of compound **7b** ..... S17

in DMSO showing the disappearance of the Q-band at 10 minutes intervals. Concentration  
~  $5.0 \times 10^{-6}$  M. (Inset: Plot of absorbance versus time).

**Computational Details**..... S18

**Table S1.** Absolute energies of the model monomers computed using B3LYP/6-31G(d,p) . S8

**Table S2.** Absolute energies of the stationary points of the model J-dimers computed using  
B3LYP/6-31G(d,p) ..... S9

**Table S3.** Absolute energies of the protonated monomers computed using B3LYP/6-  
31G(d,p) ..... S

**Figure S24** A comparison of the calculated absorption spectra (TD-B3LYP/6-31G(d,p)) of  
the model monomers and protonated monomers in chloroform..... S11

Cartesian coordinates of optimized geometries..... S12

10

15

20

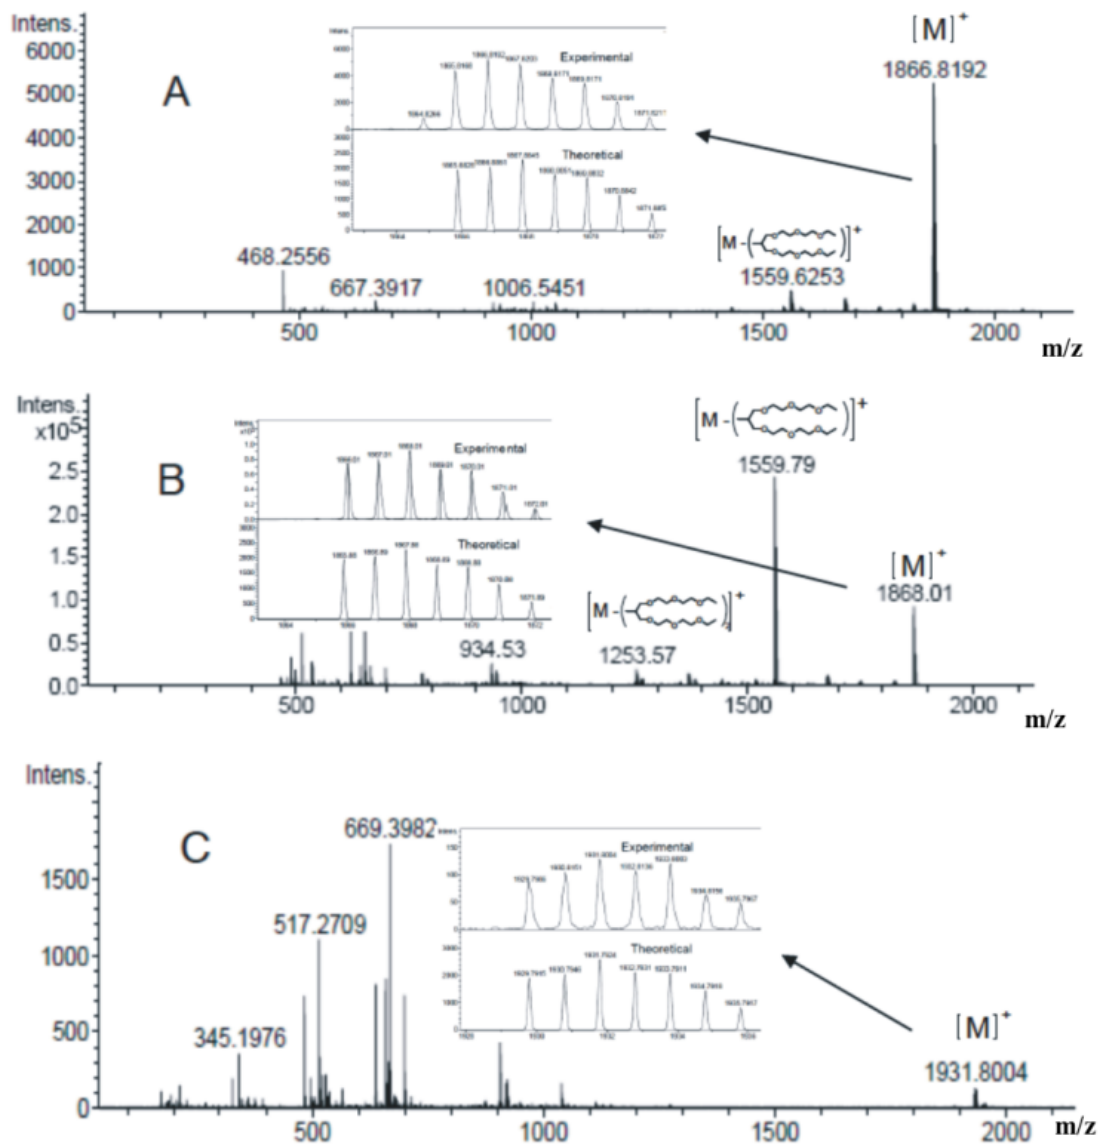

**Figure S1.** ESI-MS mass spectra of compounds 6a (A), 7a (B) and 7b (C).

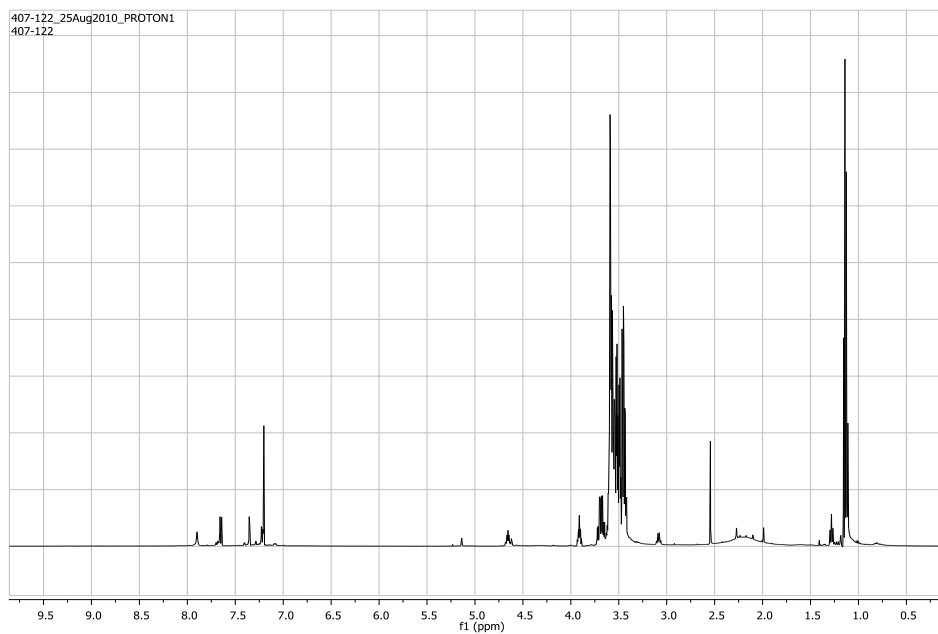

**Figure S2.**  $^1\text{H}$  NMR (in  $\text{CDCl}_3$ ) Spectrum of **6a**.

5

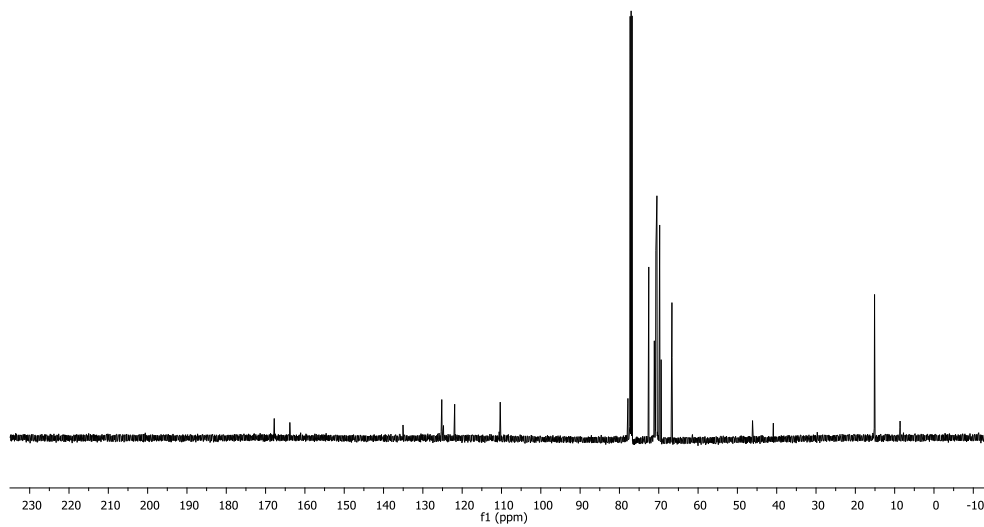

**Figure S3.**  $^{13}\text{C}$  NMR (in  $\text{CDCl}_3$ ) Spectrum of **6a**.

10

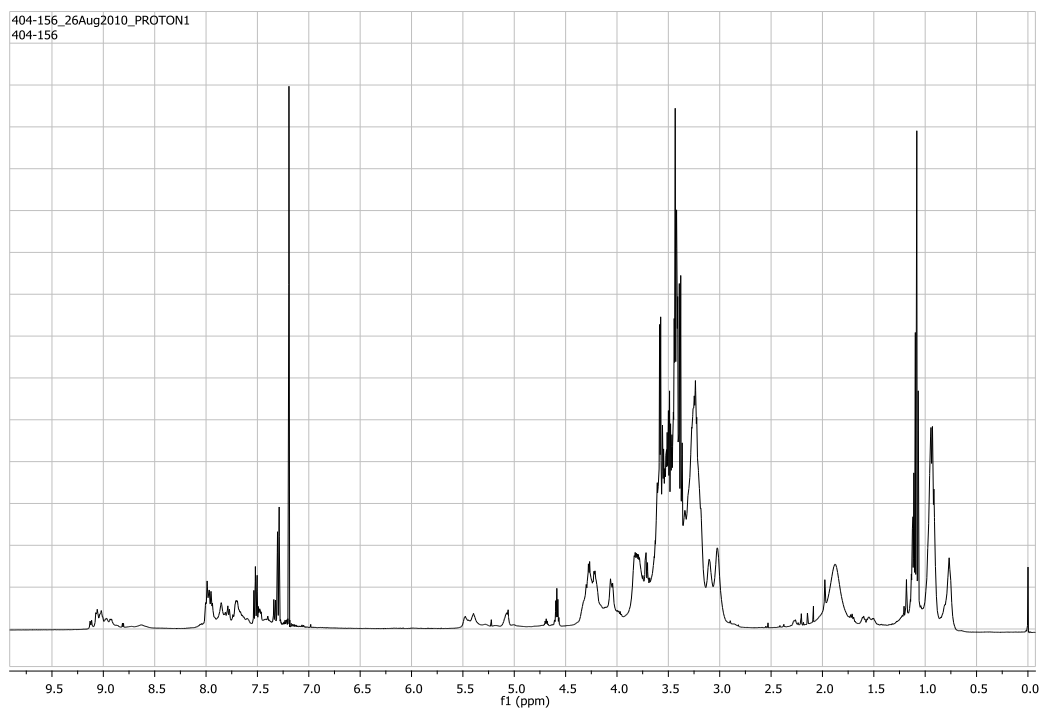

**Figure S4.**  $^1\text{H}$  NMR (in  $\text{CDCl}_3$ ) Spectrum of **7a**.

5

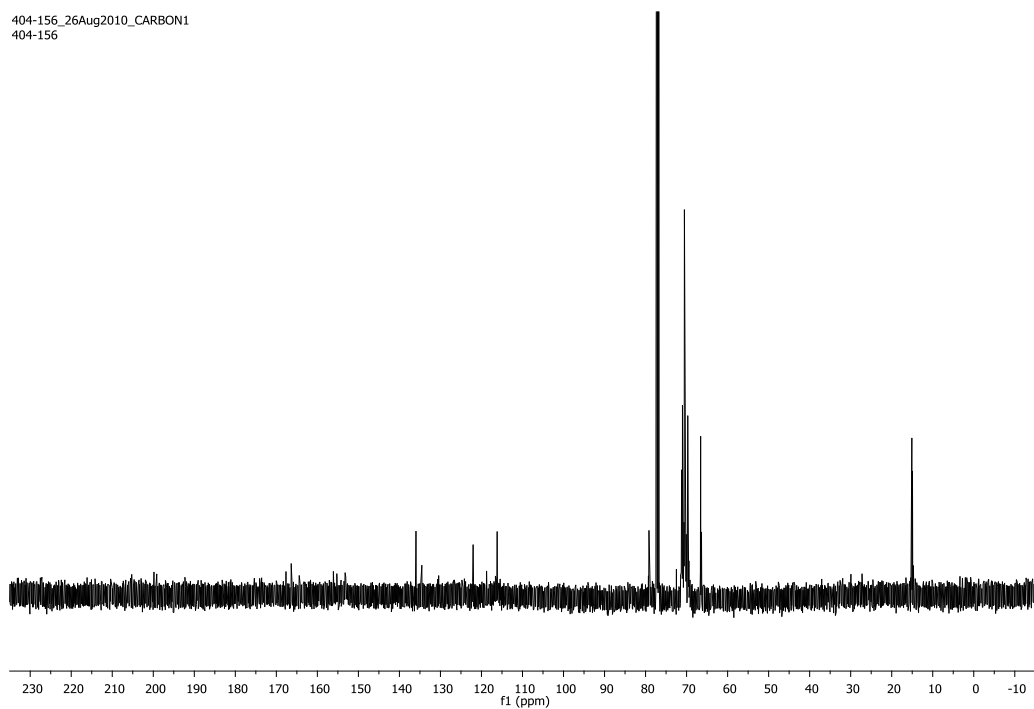

**Figure S5.**  $^{13}\text{C}$  NMR (in  $\text{CDCl}_3$ ) Spectrum of **7a**.

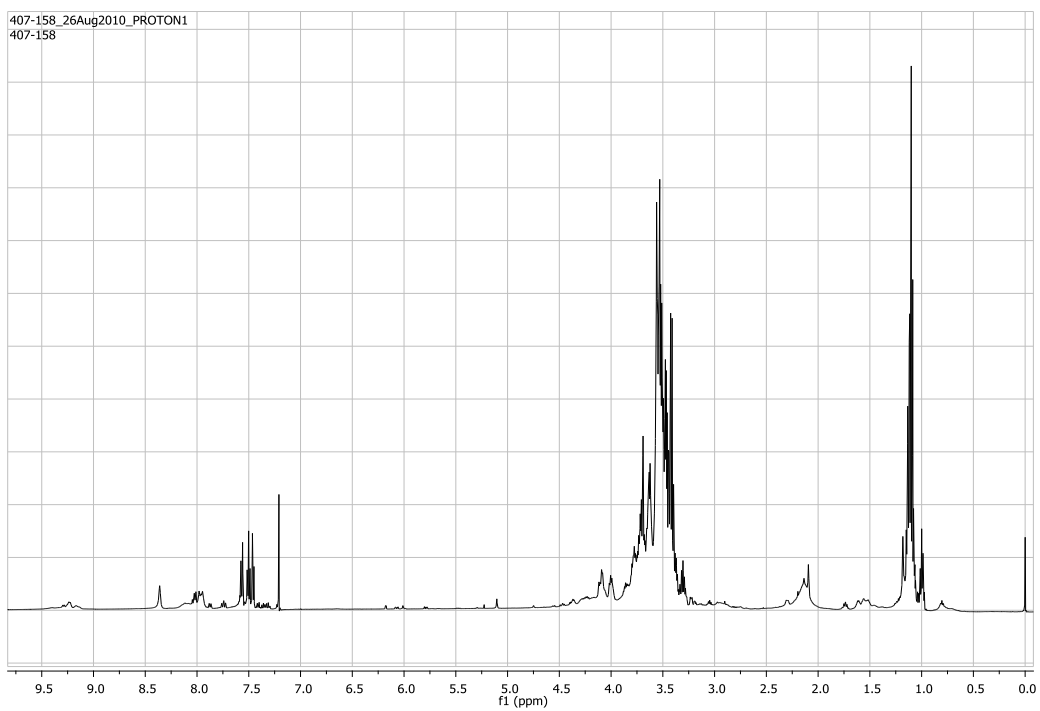

**Figure S6.**  $^1\text{H}$  NMR (in  $\text{CDCl}_3$ ) Spectrum of **7b**.

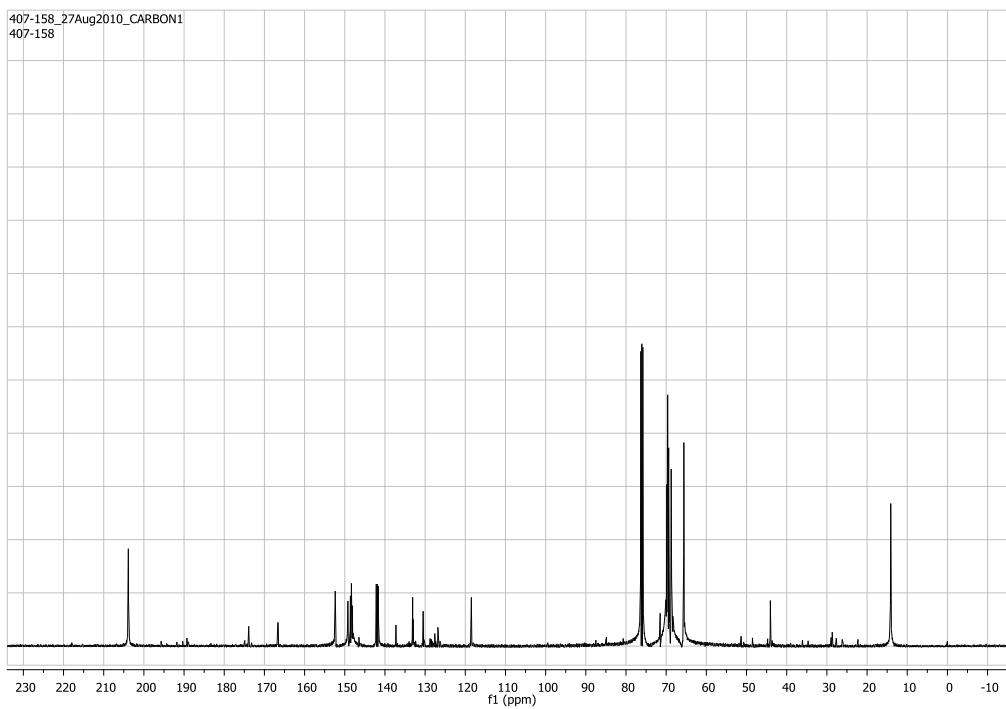

**Figure S7.**  $^{13}\text{C}$  NMR (in  $\text{CDCl}_3$ ) Spectrum of **7b**.

5

10

## Photophysical and photochemical parameters

**Fluorescence quantum yields ( $\Phi_F$ ) and lifetimes ( $\tau_F$ ):** Fluorescence quantum yields ( $\Phi_F$ ) of the studied ZnPc compounds were determined in DMSO by the comparative method using equation 1.<sup>[1,2]</sup>

$$\Phi_F = \Phi_F(\text{Std}) \frac{F \cdot A_{\text{Std}} \cdot n^2}{F_{\text{Std}} \cdot A \cdot n_{\text{Std}}^2} \quad (1)$$

where F and  $F_{\text{Std}}$  are the areas under the fluorescence emission curves of the ZnPcs (**6a-b** and **7a-b**) and the standard (**Std-ZnPc**), respectively. A and  $A_{\text{Std}}$  are the respective absorbances of the samples and standard at the excitation wavelengths, respectively.  $n^2$  and  $n_{\text{Std}}^2$  are the refractive indices of solvents used for the sample and standard, respectively. Unsubstituted ZnPc (**Std-ZnPc**) ( $\Phi_F = 0.20$  in DMSO)<sup>[3]</sup> was employed as the standard. The absorbance of the solutions at the excitation wavelength ranged between 0.04 and 0.05. The studied ZnPc compounds' (**6a-b** and **7a-b**) natural radiative lifetimes ( $\tau_0$ ) values were determined using PhotochemCAD program<sup>[4]</sup> which uses the Strickler-Berg equation for determination of  $\tau_0$  values. The fluorescence lifetimes ( $\tau_F$ ) of studied ZnPc compounds were evaluated using equation 2.

$$\Phi_F = \frac{\tau_F}{\tau_0} \quad (2)$$

**Fluorescence quenching behavior of substituted ZnPcs by 1,4-benzoquinone (BQ):** The fluorescence quenching studies on the substituted ZnPc compounds (**6a-b** and **7a-b**) were carried out by the addition of different concentrations of BQ to a fixed concentration of the samples, and the concentrations of BQ in the resulting mixtures were 0, 0.008, 0.016, 0.024, 0.032 and 0.040 M. The fluorescence spectra of the substituted ZnPc compounds (**6a-b** and **7a-b**) at each BQ concentration were recorded, and the changes in fluorescence intensity of ZnPc compounds (**6a-b** and **7a-b**) related to BQ concentration by the Stern–Volmer (SV) equation<sup>[5]</sup> (equation 3):

$$\frac{I_0}{I} = 1 + K_{SV} [\text{BQ}] \quad (3)$$

where  $I_0$  and I are the fluorescence intensities of samples (**6a-b** and **7a-b**) in the absence and presence of BQ, respectively.  $K_{SV}$  is the Stern–Volmer constant; and this is the product of the bimolecular quenching constant ( $k_q$ ) and the fluorescence lifetime  $\tau_F$  (equation 4):

$$K_{SV} = k_q \tau_F \quad (4)$$

The ratios  $I_0/I$  were calculated and plotted against [BQ] according to equation 3, and  $K_{SV}$  determined from the slope.

**Singlet oxygen quantum yields ( $\Phi_\Delta$ ):** In this study, the singlet oxygen quantum yield ( $\Phi_\Delta$ ) determinations were carried out using the experimental set-up described in the literature.<sup>[6-8]</sup> Singlet oxygen quantum yields ( $\Phi_\Delta$ ) of ZnPc compounds (**6a-b** and **7a-b**) were studied in DMSO using the relative method with unsubstituted ZnPc (**Std-ZnPc**) as reference. DPBF was used as chemical quencher for singlet oxygen in DMSO. The substituted ZnPcs (**6a-b** and **7a-b**) and the respective unsubstituted ZnPc (**Std-ZnPc**) solutions ( $C = 1 \times 10^{-5}$  M) containing the singlet oxygen quencher were irradiated in the Q band region with the photo-irradiation set-up described in references.<sup>[6-8]</sup> Equation 5 was used for the calculations of  $\Phi_\Delta$  values:

$$\Phi_\Delta = \Phi_\Delta^{\text{Std}} \frac{R \cdot I_{\text{abs}}^{\text{Std}}}{R^{\text{Std}} \cdot I_{\text{abs}}} \quad (5)$$

where  $\Phi_\Delta^{\text{Std}}$  is the singlet oxygen quantum yield for the standard ZnPc (**Std-ZnPc**) ( $\Phi_\Delta^{\text{Std}} = 0.67$  in DMSO).<sup>[9]</sup> R and  $R_{\text{Std}}$  are the DPBF photobleaching rates in the presence of the samples (**6a-b** and **7a-b**) and standard, respectively.  $I_{\text{abs}}$  and  $I_{\text{abs}}^{\text{Std}}$  are the rates of light absorption by the samples (**6a-b** and **7a-b**) and standard, respectively. To avoid chain reactions induced by DPBF in the presence of singlet oxygen, the concentration of DPBF was lowered to  $\sim 3 \times 10^{-5}$  M.<sup>[10]</sup> Solutions of sensitizers ( $C = 1 \times 10^{-5}$  M) containing DPBF quencher were prepared in the dark and irradiated in the Q band region of samples using



the photoirradiation setup. The degradation of DPBF at 417 nm was monitored by UV-Vis spectrophotometer. The light intensity  $6.54 \times 10^{15}$  photons  $s^{-1} cm^{-2}$  was used for  $\Phi_d$  determinations.

**Photodegradation quantum yields ( $\Phi_d$ ):** Photodegradation quantum yield ( $\Phi_d$ ) studies for substituted ZnPcs (**6a-b** and **7a-b**) were carried out using the experimental set-up described in the literature.<sup>[6-8]</sup> Photodegradation quantum yields of samples (**6a-b** and **7a-b**) were determined using equation 6,

$$\Phi_d = \frac{(C_0 - C_t) \cdot V \cdot N_A}{I_{abs} \cdot S \cdot t} \quad (6)$$

where  $C_0$  and  $C_t$  are the samples (**6a-b** and **7a-b**) concentrations before and after photoirradiation respectively,  $V$  is the reaction volume,  $N_A$  is the Avogadro's constant,  $S$  is the irradiated cell area and  $t$  is the irradiation time.  $I_{abs}$  is the overlap integral of the radiation source light intensity and the absorption of the samples (**6a-b** and **7a-b**). A light intensity of  $2.18 \times 10^{16}$  photons  $s^{-1} cm^{-2}$  was employed for  $\Phi_d$  determinations.

#### References

- 1 S. Fery-Forgues and D. Lavabre, *J. Chem. Ed.*, 1999, **76**, 1260-1264.
- 2 D. Maree, T. Nyokong, K. Suhling and D. Phillips, *J. Porphyr. Phthalocyanines*, 2002, **6**, 373-376.
- 3 A. Ogunsipe, J-Y Chen and T. Nyokong, *New J. Chem.*, 2004, **28**, 822-827.
- 4 H. Du, R.A. Fuh, J. Li, A. Corkan and J.S. Lindsey, *Photochem. Photobiol.*, 1998, **68**, 141-142.
- 5 J. Rose, *Advanced Physico-chemical Experiments*, 1st ed., Sir Isaac Pitman & Sons Ltd., London, 1964, p. 257.
- 6 J.H. Brannon and D. Madge, *J. Am. Chem. Soc.*, 1980, **102**, 62-65.
- 7 I. Seotsanyana-Mokhosi, N. Kuznetsova and T. Nyokong, *J. Photochem. Photobiol. A: Chem.*, 2001, **140**, 215-222.
- 8 A. Ogunsipe and T. Nyokong, *J. Photochem. Photobiol. A: Chem.* 2005, **173**, 211-220.
- 9 N. Kuznetsova, N. Gretsova, E. Kalmkova, E. Makarova, S. Dashkevich, V. Negrimovski, O. Kaliya and E. Luk'yanets, *Russ. J. Gen. Chem.*, 2000, **70**, 133-140.
- 10 W. Spiller, H. Kliesch, D. Wöhrle, S. Hackbarth, B. Roder and G. Schnurpfeil, *J. Porphyrins Phthalocyanines*, 1998, **2**, 145-158.

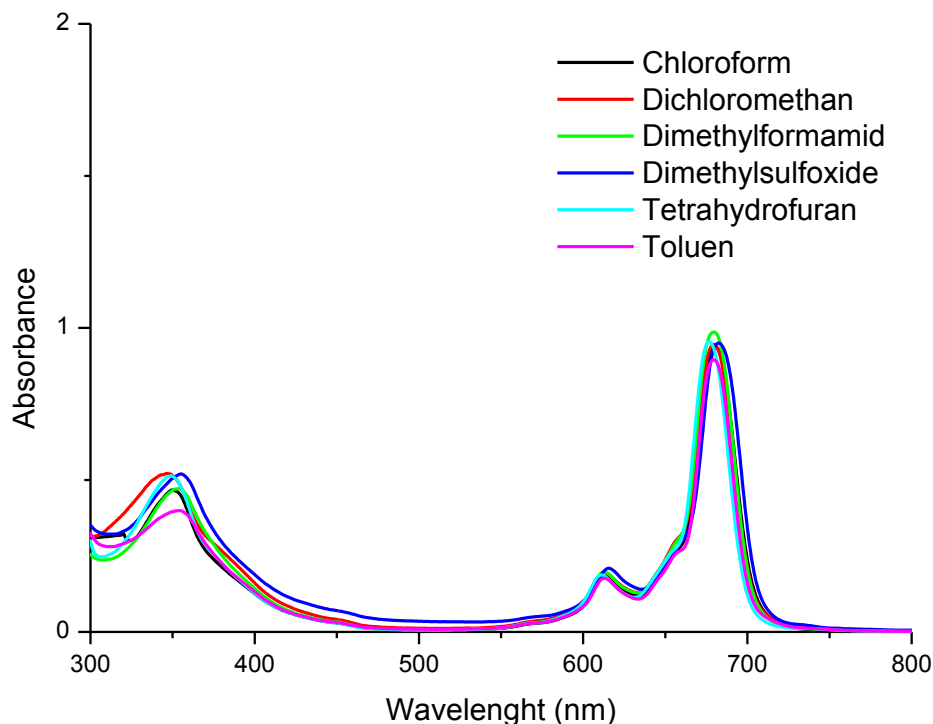

**Figure S8.** Absorption spectra of **6a** in different solvents. Concentration  $\sim 5.0 \times 10^{-6}$  M.

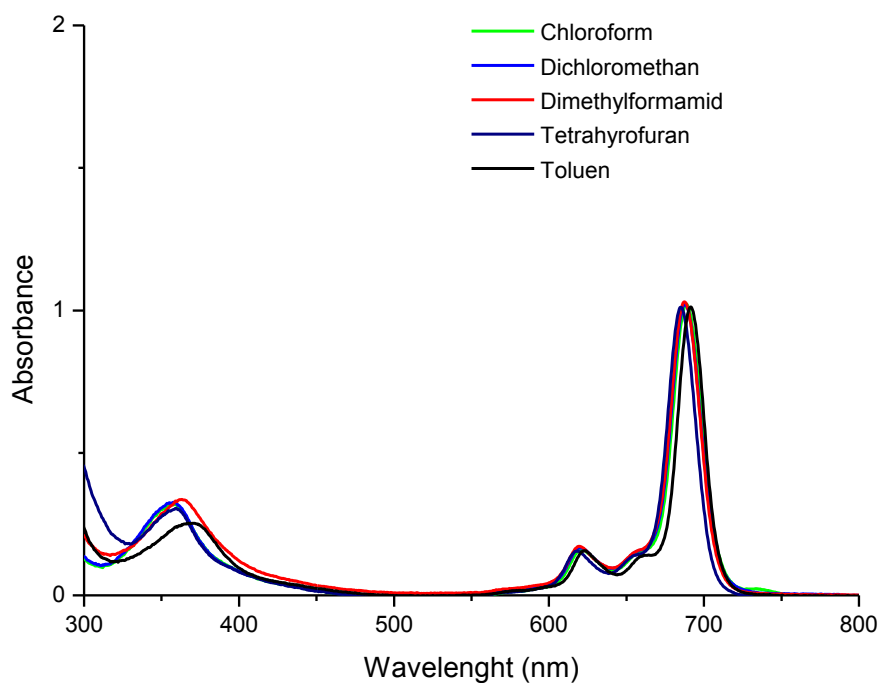

**Figure S9.** Absorption spectra of **6b** in different solvents. Concentration  $\sim 5.0 \times 10^{-6}$  M.

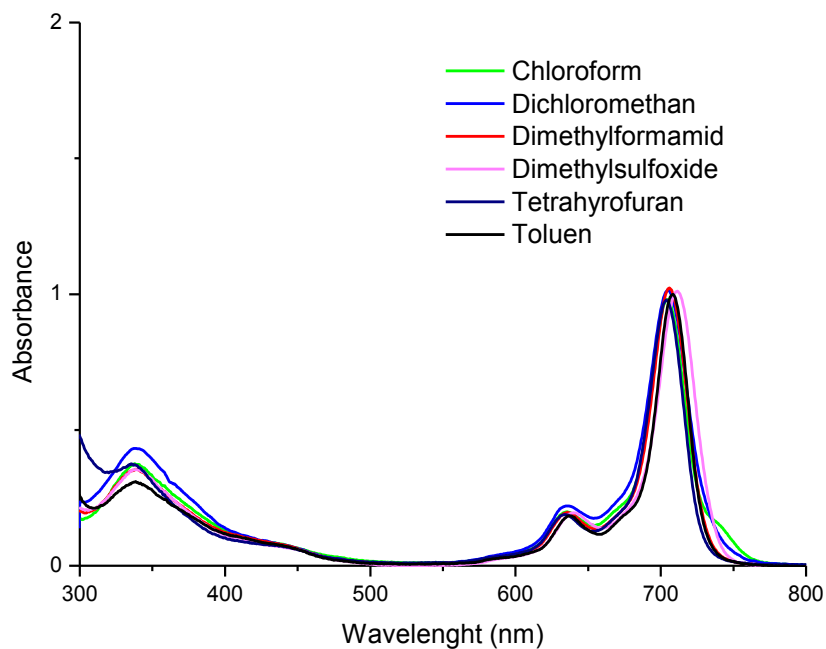

**Figure S10.** Absorption spectra of **7b** in different solvents. Concentration  $\sim 5.0 \times 10^{-6}$  M.

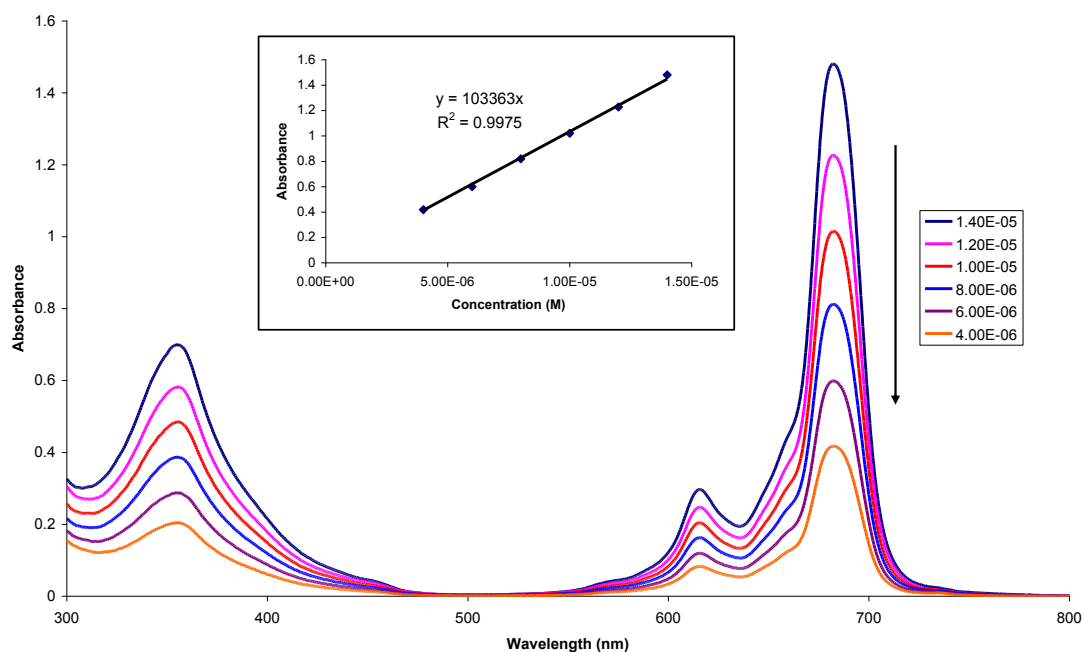

**Figure S11.** Absorption spectra of compound **6a** at different concentrations in DMSO.

5

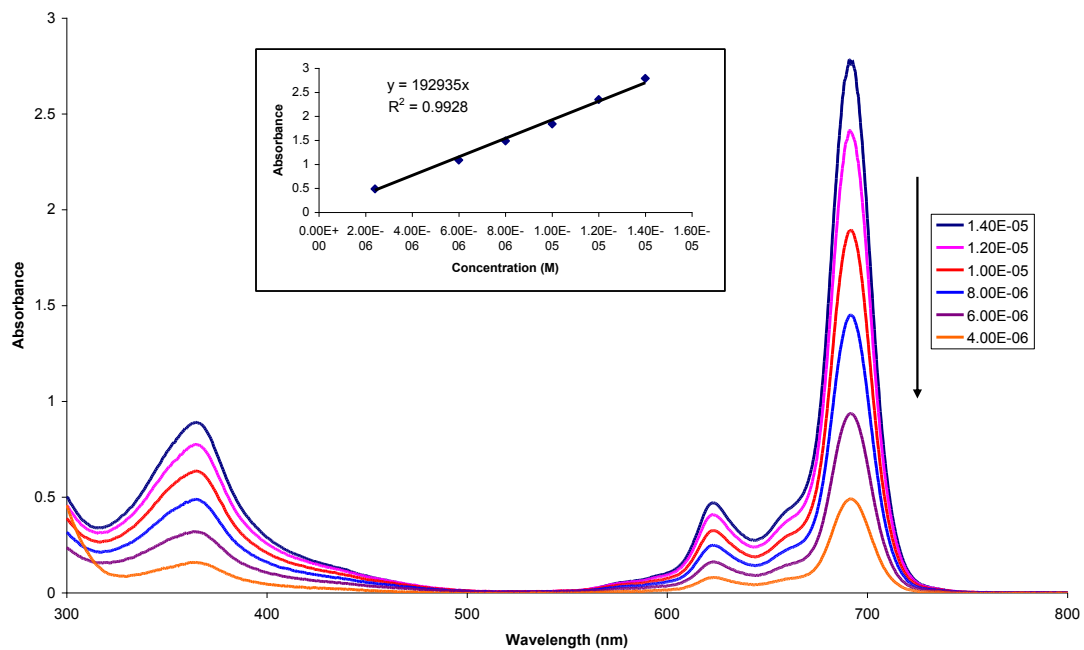

**Figure S12.** Absorption spectra of compound **6b** at different concentrations in DMSO.

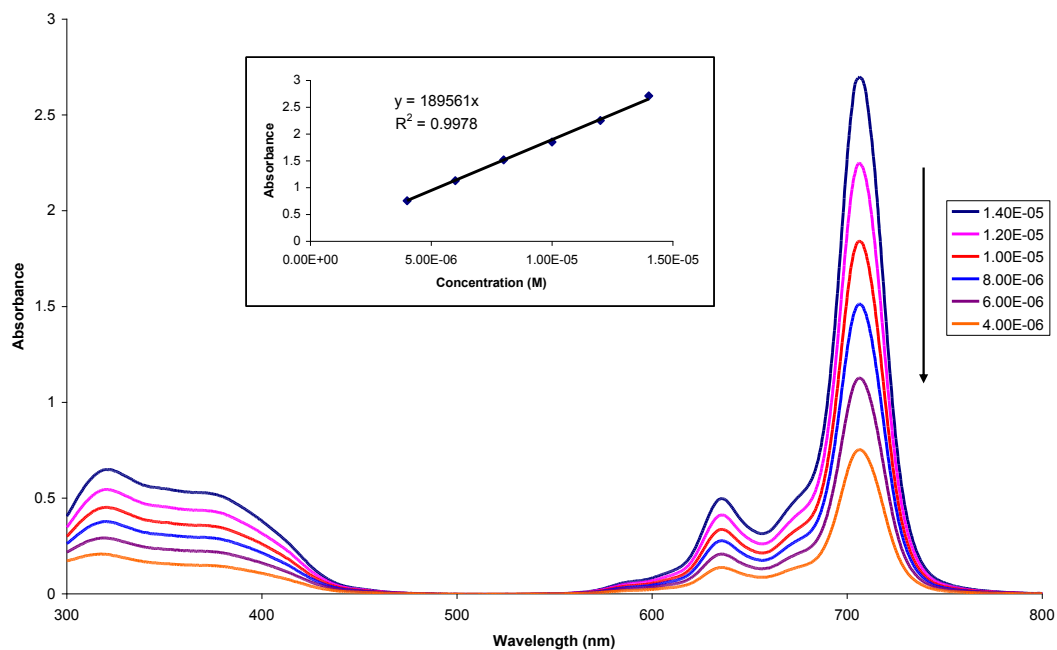

**Figure S13.** Absorption spectra of compound **7a** at different concentrations in DMSO.

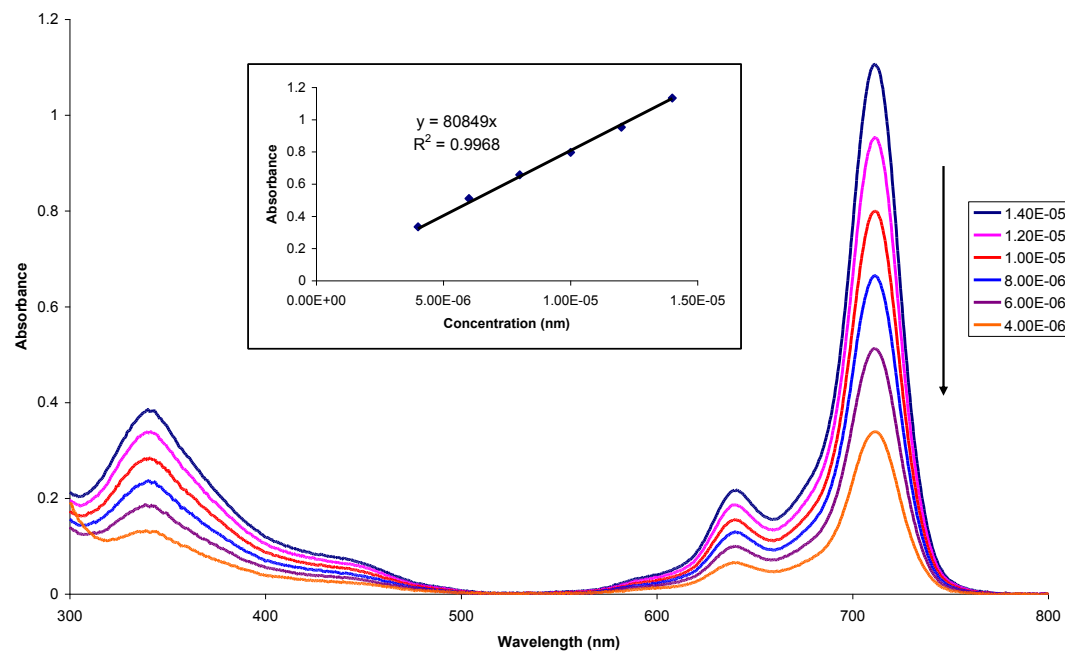

**Figure S14.** Absorption spectra of compound **7b** at different concentrations in DMSO.

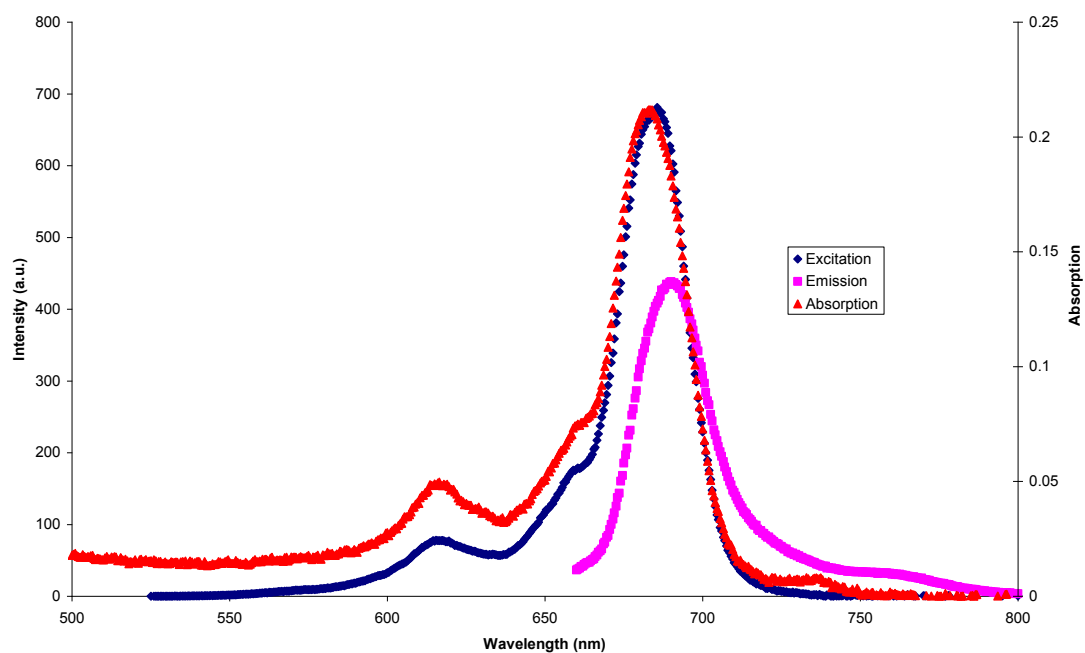

5 **Figure S15.** Absorption, fluorescence emission and excitation spectra for compound **6a** in DMSO. Excitation wavelengths = 660 nm.

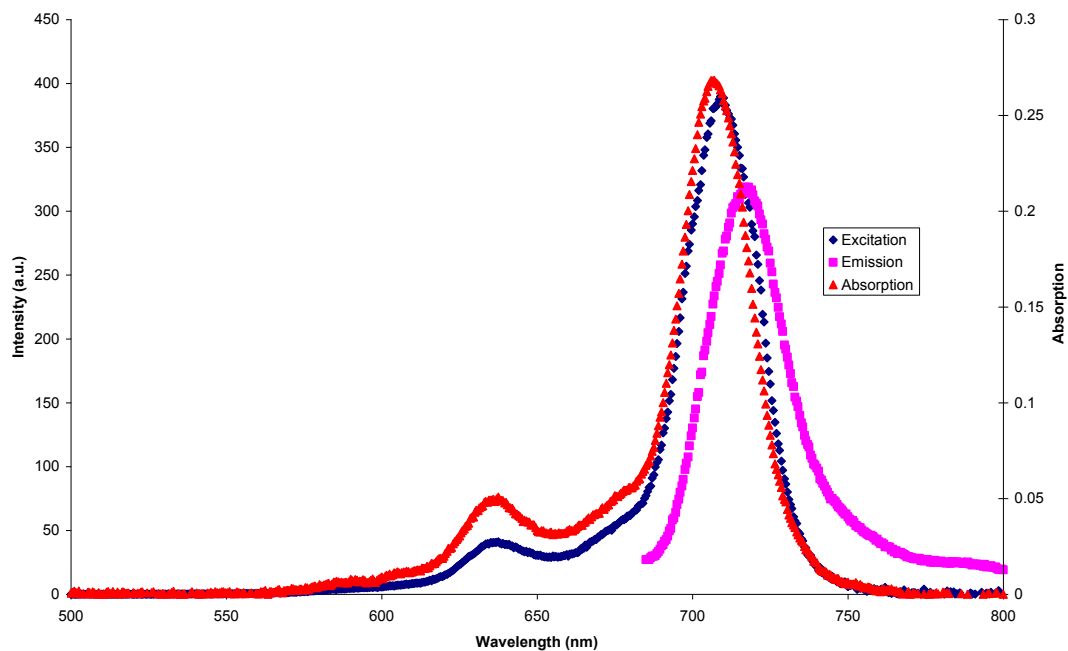

10 **Figure S16.** Absorption, fluorescence emission and excitation spectra for compound **7a** in DMSO. Excitation wavelengths = 675 nm.

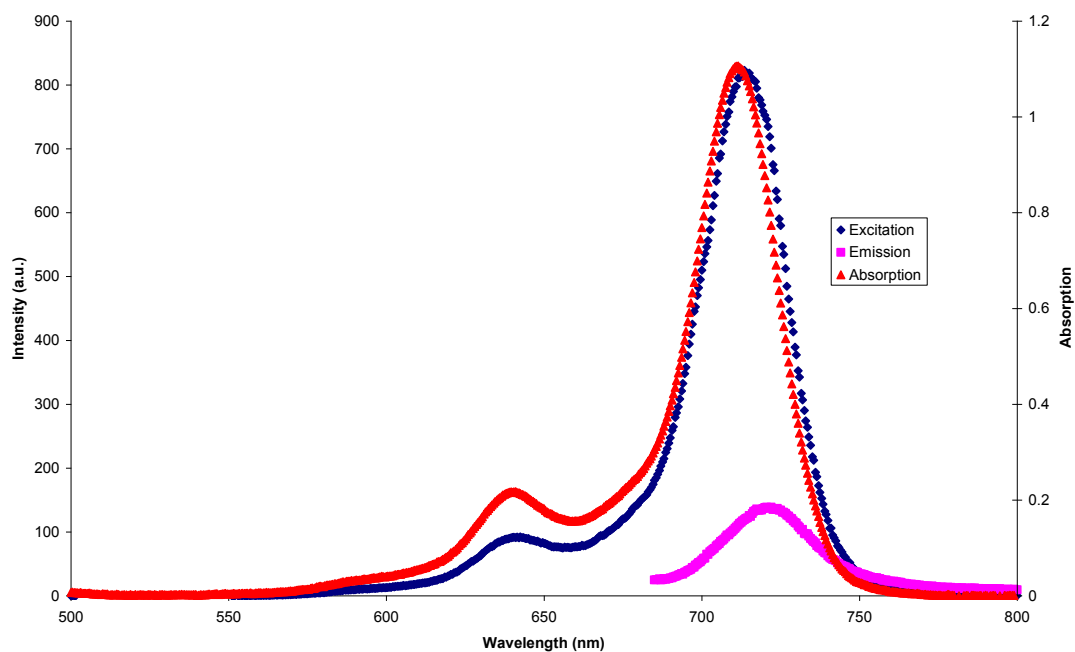

**Figure S17.** Absorption, fluorescence emission and excitation spectra for compound **7b** in DMSO. Excitation wavelengths = 675 nm.

5

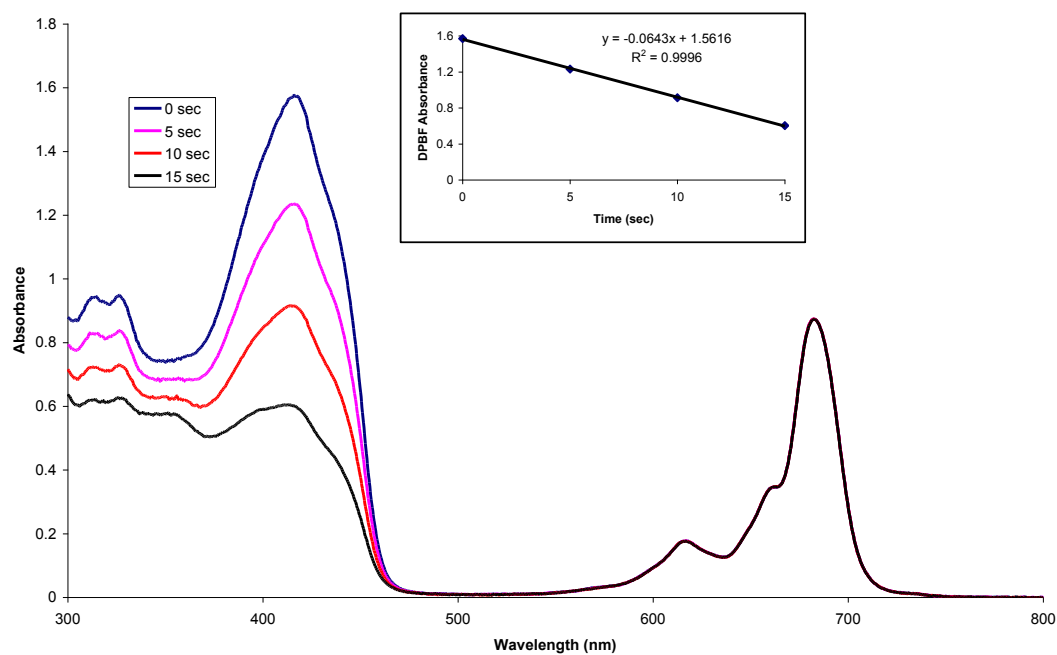

10

**Figure S18.** Absorption changes during the determination of singlet oxygen quantum yield. This determination was for compound **6a** in DMSO at a concentration of  $1 \times 10^{-5}$  M. (Inset: Plot of DPBF absorbance versus time).

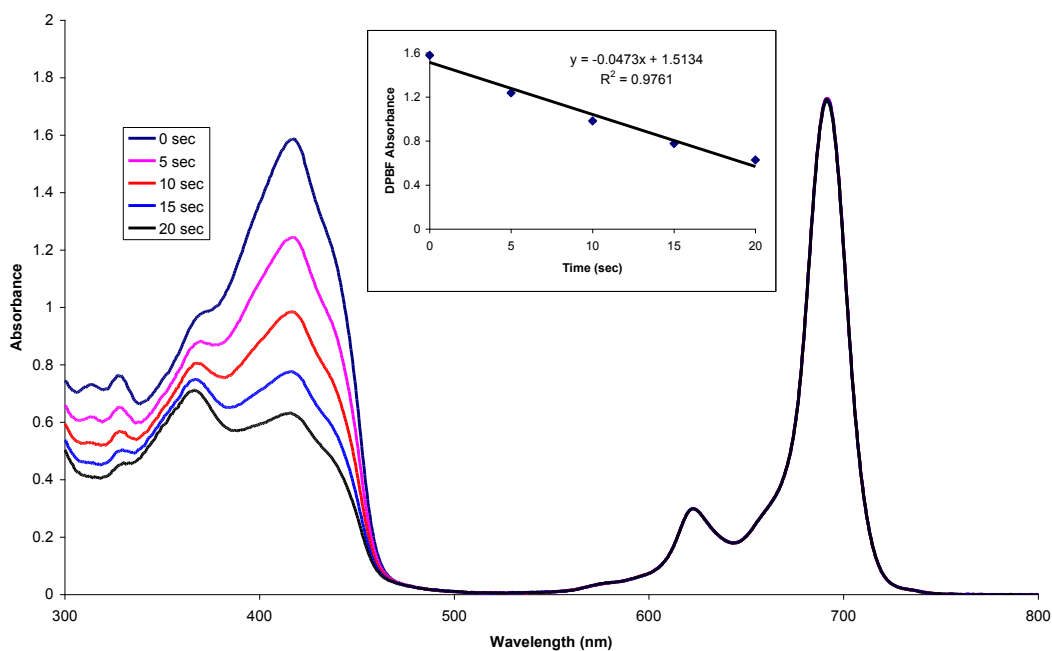

**Figure S19.** Absorption changes during the determination of singlet oxygen quantum yield. This determination was for compound **6b** in DMSO at a concentration of  $1 \times 10^{-5}$  M. (Inset: Plot of DPBF absorbance versus time).

5

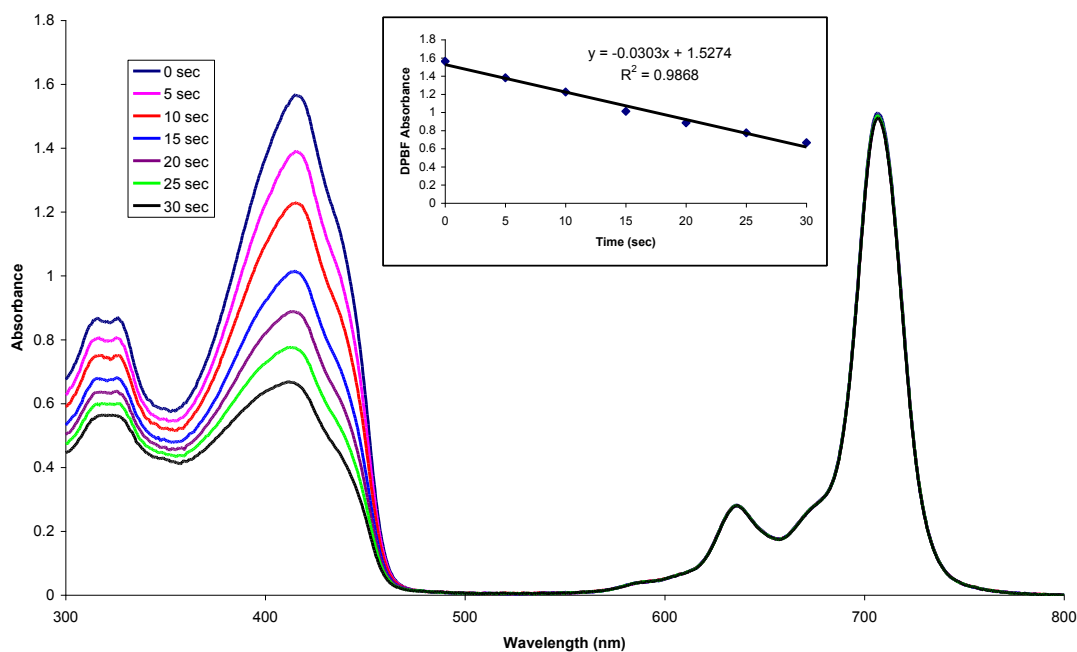

**Figure S20.** Absorption changes during the determination of singlet oxygen quantum yield. This determination was for compound **7a** in DMSO at a concentration of  $1 \times 10^{-5}$  M. (Inset: Plot of DPBF absorbance versus time).

10

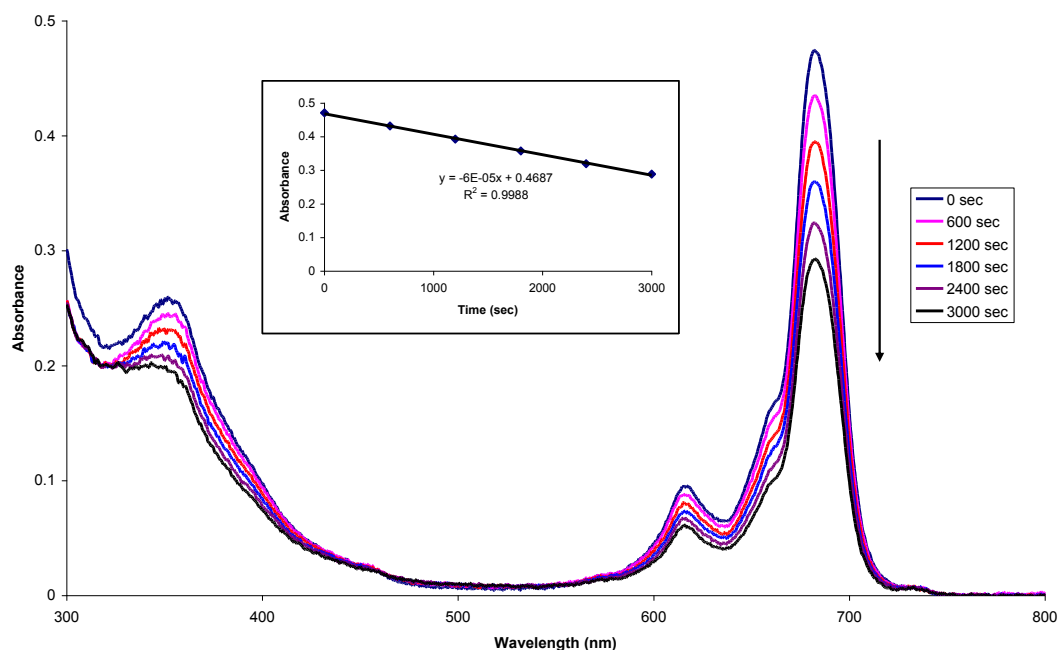

5 **Figure S21.** Absorption changes during the photodegradation studies of compound **6a** in DMSO showing the disappearance of the Q-band at 10 minutes intervals. Concentration  $\sim 5.0 \times 10^{-6}$  M. (Inset: Plot of absorbance versus time).

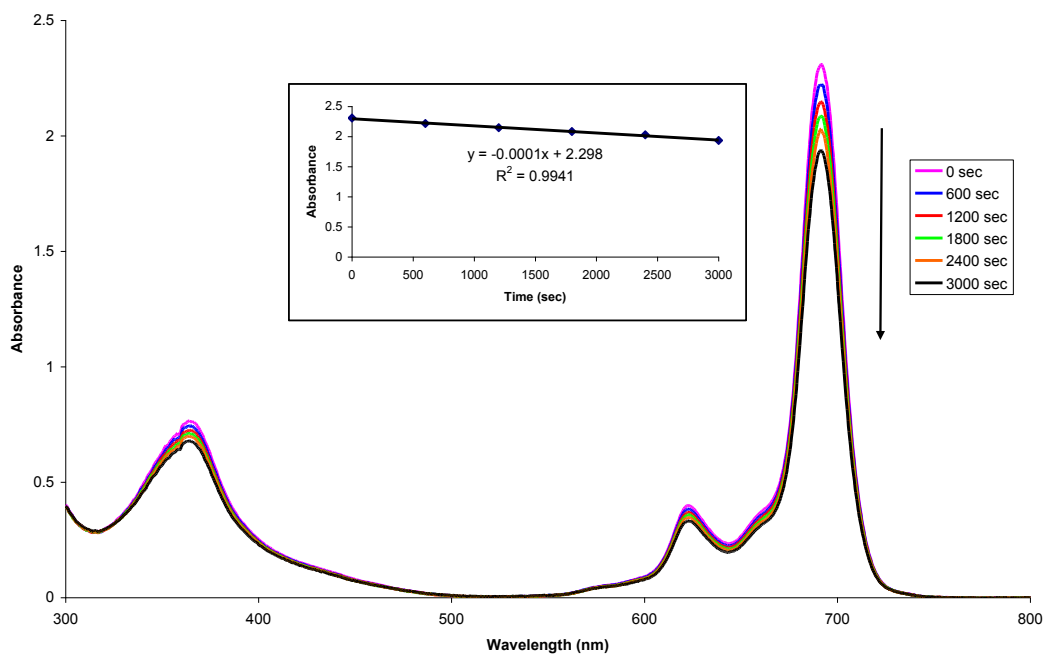

10 **Figure S22.** Absorption changes during the photodegradation studies of compound **6b** in DMSO showing the disappearance of the Q-band at 10 minutes intervals. Concentration  $\sim 5.0 \times 10^{-6}$  M. (Inset: Plot of absorbance versus time).



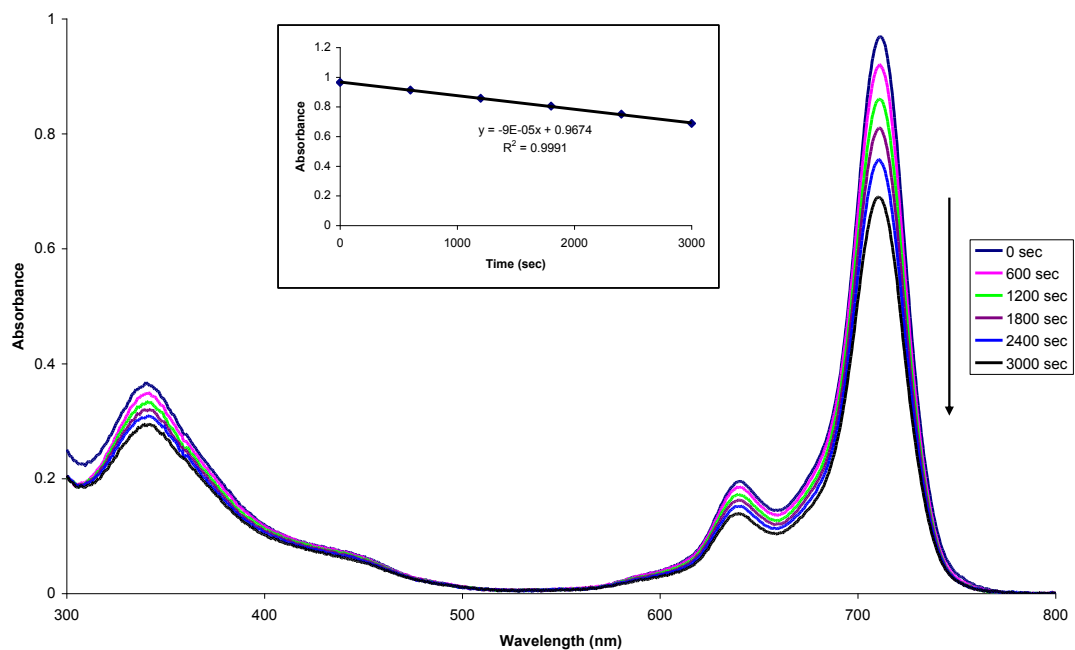

**Figure S23.** Absorption changes during the photodegradation studies of compound **7b** in DMSO showing the disappearance of the Q-band at 10 minutes intervals. Concentration  $\sim 5.0 \times 10^{-6}$  M. (Inset: Plot of absorbance versus time).

5

10

15

20

25

30

### Computational details:

The DFT<sup>[1]</sup> and semi-empirical calculations were carried out using Gaussian 09<sup>[2]</sup> and Spartan 10<sup>[3]</sup> packages, respectively. Considering the size of the structures **7a-b** and computational cost, we performed all computations on the model ZnPc structures (Figure 12) by replacing the poly(oxyethylene) and poly(thioethylene) bulky groups on benzene rings with methoxy and methylthio groups, respectively. Besides, symmetry isomers ( $C_{4h}$ ,  $D_{2h}$ ,  $C_{2v}$ , and  $C_s$ ) of these model ZnPcs were also taken into consideration, since all four possible symmetry isomers can be formed during reaction. Conformational search for each symmetry (**8a-d** and **9a-d**) was done using AM1<sup>[4]</sup> method. Taking the most stable conformations as prime input, DFT optimizations were carried out using the B3LYP level of theory<sup>[5,6]</sup> using the 6-31G(d,p)<sup>[7]</sup> basis set.

To study the aggregation process, J-dimeric arrangements of **8a-d** and **9a-d** were constructed using their optimized geometries as monomers. The optimizations of model J-dimers were done with B3LYP/6-31G(d,p) level and interaction energies were calculated.

In order to calculate the proton affinities of nitrogen atoms which have different electronic environment (Figure 11) on the model monomers (**8a-d** and **9a-d**), protonated species of **8a-d** and **9a-d** were also optimized with the same level. All stationary points were confirmed to be local minima by performing analytic computations of vibrational frequencies in the harmonic approximation. Thermal corrections to the zero point energy (ZPE), enthalpy, and entropy were calculated at 298.15 K and 1 atm. Proton affinities (PA) of model monomers were calculated using the equation  $PA = \Delta E_{\text{prot}} + 5RT/2$ .  $\Delta E_{\text{prot}} = E_{\text{tot}}(M) - E_{\text{tot}}(MH^+)$  is the difference between zero-point corrected total energies of monomer (M) and protonated monomer ( $MH^+$ ). In order to compare electronic absorption spectra of the model monomers (**8a-d** and **9a-d**), J-dimers and protonated monomers in chloroform, TD-DFT computations at the B3LYP/6-31G(d,p) level combined with the polarizable continuum model (PCM)<sup>[8]</sup> were carried out on the optimized ground state geometries, by considering the first twelve singlet excited states. Absorption spectra were simulated using SpecDis Version 1.51 program package.<sup>[9]</sup>

### References

- 1 R. G. Parr and W. Yang, Density-Functional Theory of Atoms and Molecules; Oxford University Press: New York, 1989.
- 2 M. J. Frisch, G. W. Trucks, H. B. Schlegel, G. E. Scuseria, M. A. Robb, J. R. Cheeseman, G. Scalmani, V. Barone, B. Mennucci, G. A. Petersson, H. Nakatsuji, M. Caricato, X. Li, H. P. Hratchian, A. F. Izmaylov, J. Bloino, G. Zheng, J. L. Sonnenberg, M. Hada, M. Ehara, K. Toyota, R. Fukuda, J. Hasegawa, M. Ishida, T. Nakajima, Y. Honda, O. Kitao, H. Nakai, T. Vreven, J. A. Montgomery, Jr., J. E. Peralta, F. Ogliaro, M. Bearpark, J. J. Heyd, E. Brothers, K. N. Kudin, V. N. Staroverov, R. Kobayashi, J. Normand, K. Raghavachari, A. Rendell, J. C. Burant, S. S. Iyengar, J. Tomasi, M. Cossi, N. Rega, J. M. Millam, M. Klene, J. E. Knox, J. B. Cross, V. Bakken, C. Adamo, J. Jaramillo, R. Gomperts, R. E. Stratmann, O. Yazyev, A. J. Austin, R. Cammi, C. Pomelli, J. W. Ochterski, R. L. Martin, K. Morokuma, V. G. Zakrzewski, G. A. Voth, P. Salvador, J. J. Dannenberg, S. Dapprich, A. D. Daniels, O. Farkas, J. B. Foresman, J. V. Ortiz, J. Cioslowski, and D. J. Fox, Gaussian, Inc., Wallingford CT, 2009.
- 3 Spartan 10, Wavefunction Inc.: Irvine, CA.
- 4 M. Dewar and W. Thiel. *J. Am. Chem. Soc.* 1977, **99**, 4899-4907.
- 5 A. D. Becke, *J. Chem. Phys.* 1993, **98**, 5648-5652.
- 6 C. Lee and W. Yang, R. G. Parr, *Phys. Rev. B* 1988, **37**, 785-789.
- 7 R. Ditchfield, W. J. Hehre and J. A. Pople, *J. Chem. Soc.* 1971, **54**, 724-728.
- 8 S. Miertus, E. Scrocco and J. Tomasi, *Chem. Phys.* 1981, **55**, 117-129.
- 9 T. Bruhn, A. Schaumlöffel, Y. Hemberger and G. Bringmann, SpecDis version 1.53, University of Wuerzburg, Germany, 2012.

**Table S1.** Absolute energies (au) of the model monomers calculated with B3LYP/6-31G(d,p). ZPE: Zero point energy, H: Enthalpy, G:Gibbs energy, NIF: Number of imaginary frequency.

|             | <b>ZPE</b>   | <b>H</b>     | <b>G</b>     | <b>NIF</b> |
|-------------|--------------|--------------|--------------|------------|
| <b>8a</b>   | -3903,934610 | -3903,894615 | -3904,006279 | 0          |
| <b>8b</b>   | -3903,929880 | -3903,889566 | -3904,001886 | 0          |
| <b>8c</b>   | -3903,932445 | -3903,892219 | -3904,004581 | 0          |
| <b>8d</b>   | -3903,932422 | -3903,892236 | -3904,004341 | 0          |
| <b>9a</b>   | -5195,874253 | -5195,831613 | -5195,950807 | 0          |
| <b>9b</b>   | -5195,85995  | -5195,81742  | -5195,93462  | 0          |
| <b>9c</b>   | -5195,867091 | -5195,824500 | -5195,942675 | 0          |
| <b>9d</b>   | -5195,867095 | -5195,824531 | -5195,942412 | 0          |
| <b>p-8a</b> | -3903,950456 |              |              | 0          |
| <b>p-8b</b> | -3903,950271 |              |              | 0          |
| <b>p-8c</b> | -3903,952684 |              |              | 0          |
| <b>p-8d</b> | -3903,915636 |              |              | 0          |

**Table S2.** Absolute energies (au) of the model J-dimers calculated with B3LYP/6-31G(d,p). ZPE: Zero point energy, H: Enthalpy, G:Gibbs energy, NIF: Number of imaginary frequency.

|                    | <b>ZPE</b>    | <b>H</b>      | <b>G</b>      | <b>NIF</b> |
|--------------------|---------------|---------------|---------------|------------|
| <b>Dimer of 8a</b> | -7807,882860  | -7807,802297  | -7808,000203  | 0          |
| <b>Dimer of 8b</b> | -7807,885687  | -7807,805321  | -7808,000797  | 0          |
| <b>Dimer of 8c</b> | -7807,882001  | -7807,801463  | -7807,998586  | 0          |
| <b>Dimer of 8d</b> | -7807,886359  | -7807,806075  | -7808,001304  | 0          |
| <b>Dimer of 9a</b> | -10391,762245 | -10391,676780 | -10391,887227 | 0          |
| <b>Dimer of 9b</b> | -10391,736339 | -10391,650852 | -10391,858982 | 0          |
| <b>Dimer of 9c</b> | -10391,745154 | -10391,659701 | -10391,868143 | 0          |
| <b>Dimer of 9d</b> | -10391,739219 | -10391,653676 | -10391,864056 | 0          |

**Table S3.** Absolute zero point energies (au) of the protonated monomers calculated with B3LYP/6-31G(d,p).

| Sym.            | ZnPc | N type | ZPE          | ZnPc | N type | ZPE          | ZnPc         | N type | ZPE          |
|-----------------|------|--------|--------------|------|--------|--------------|--------------|--------|--------------|
| C <sub>4h</sub> | 8a   | Na     | -3904,342675 | 9a   | Na     | -5196,272007 | <i>p</i> -8a | Na     | -3904,343035 |
| D <sub>2h</sub> | 8b   | Na     | -3904,345008 | 9b   | Na     | -5196,259478 | <i>p</i> -8b | Na     | -3904,344270 |
|                 |      | Nb     | -3904,320390 |      | Nb     | -5196,245827 |              | Nb     | -3904,344438 |
| C <sub>2v</sub> | 8c   | Na     | -3904,351149 | 9c   | Na     | -5196,269759 | <i>p</i> -8c | Na     | -3904,341868 |
|                 |      | Nb     | -3904,336805 |      | Nb     | -5196,262001 |              | Nb     | -3904,343918 |
|                 |      | Nc     | -3904,326014 |      | Nc     | -5196,255647 |              | Nc     | -3904,346074 |
| C <sub>s</sub>  | 8d   | Na     | -3904,350965 | 9d   | Na     | -5196,269567 | <i>p</i> -8d | Na     | -3904,302674 |
|                 |      | Nb     | -3904,325870 |      | Nb     | -5196,255841 |              | Nb     | -3904,304212 |
|                 |      | Nc     | -3904,336899 |      | Nc     | -5196,262051 |              | Nc     | -3904,305914 |
|                 |      | Nd     | -3904,337194 |      | Nd     | -5196,262132 |              | Nd     | -3904,305691 |

5

10

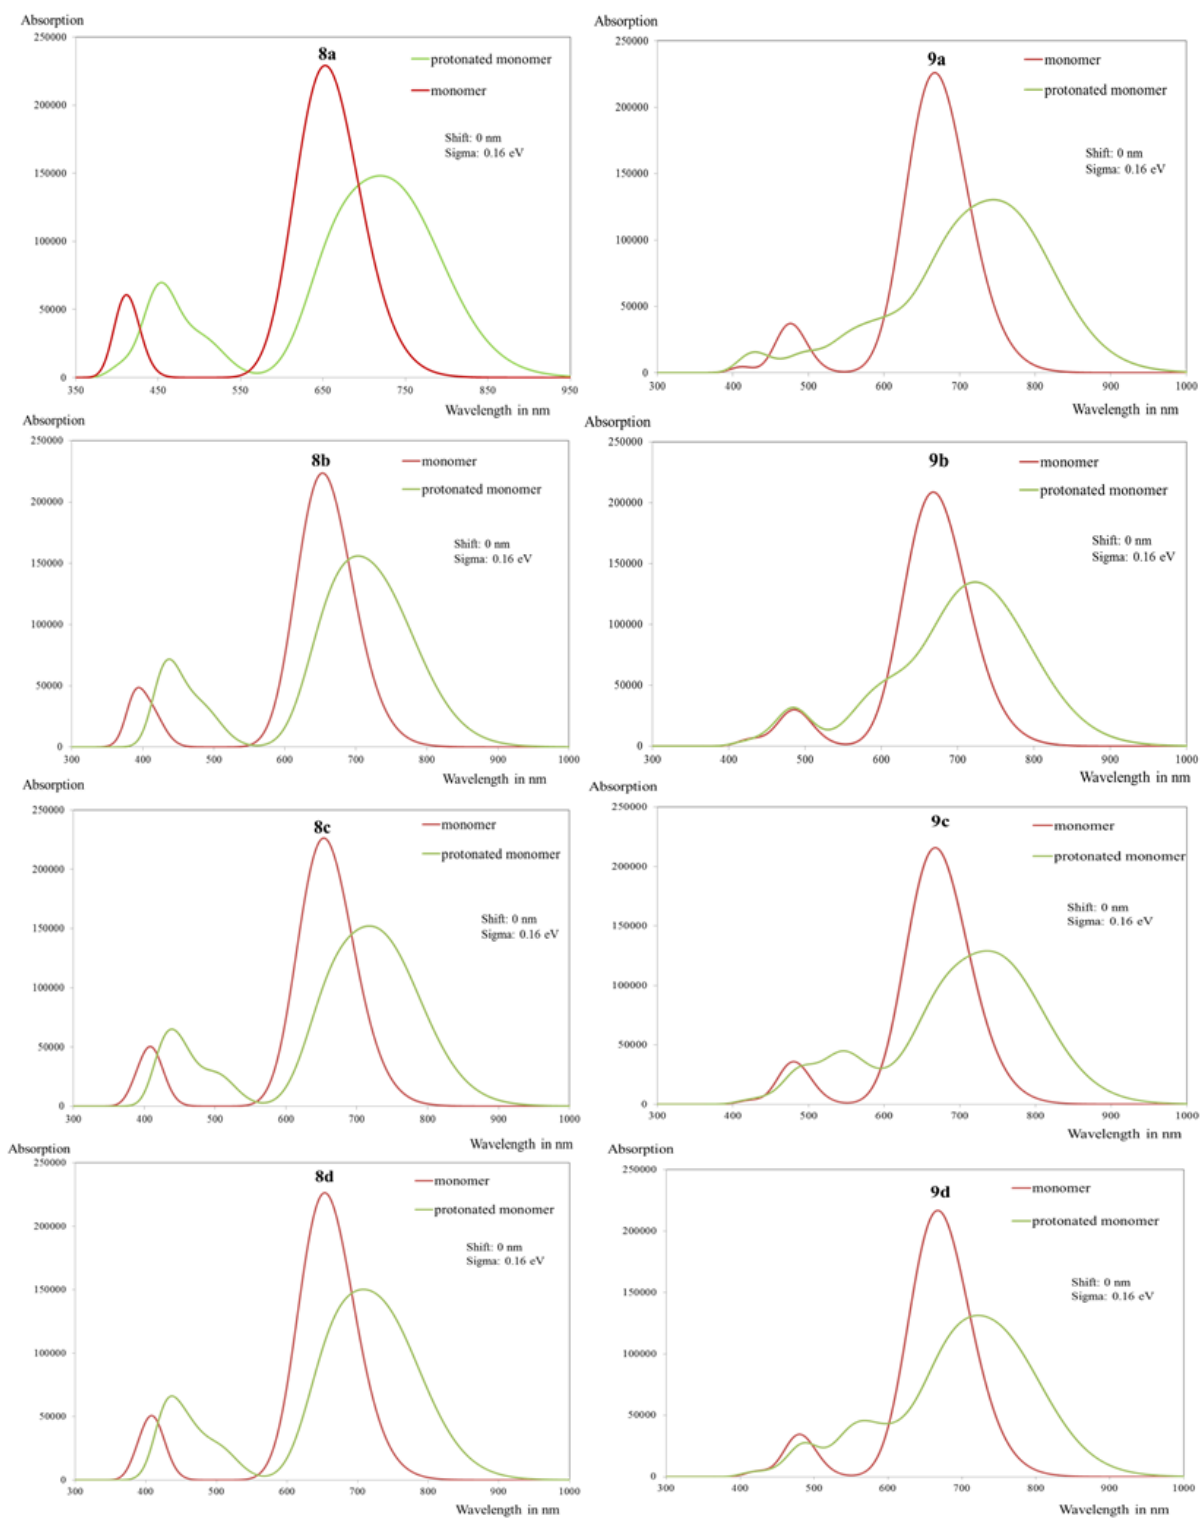

**Figure S24.** A comparison of the calculated absorption spectra (TD-B3LYP/6-31G(d,p)) of the model monomers and protonated monomers in chloroform.

## Cartesian coordinates of optimized geometries with B3LYP/6-31G(d,p).

8a

Standard orientation:

| Center<br>Number | Atomic<br>Number | Atomic<br>Type | Coordinates (Angstroms) |           |           |
|------------------|------------------|----------------|-------------------------|-----------|-----------|
|                  |                  |                | X                       | Y         | Z         |
| 1                | 6                | 0              | -0.181298               | -5.590745 | 0.000425  |
| 2                | 6                | 0              | 2.595616                | -4.901224 | 0.000453  |
| 3                | 6                | 0              | 0.817276                | -6.574678 | 0.000635  |
| 4                | 6                | 0              | 0.226842                | -4.242395 | 0.000212  |
| 5                | 6                | 0              | 1.600261                | -3.924511 | 0.000236  |
| 6                | 6                | 0              | 2.179541                | -6.228333 | 0.000637  |
| 7                | 1                | 0              | 0.547103                | -7.623586 | 0.000829  |
| 8                | 1                | 0              | 2.916248                | -7.026608 | 0.000800  |
| 9                | 1                | 0              | 3.642635                | -4.620402 | 0.000458  |
| 10               | 6                | 0              | -0.492984               | -2.971282 | -0.000007 |
| 11               | 6                | 0              | 1.691148                | -2.466877 | 0.000014  |
| 12               | 7                | 0              | 0.424752                | -1.945535 | -0.000134 |
| 13               | 7                | 0              | -1.816898               | -2.850570 | -0.000062 |
| 14               | 6                | 0              | -2.466812               | -1.691037 | -0.000195 |
| 15               | 6                | 0              | -3.924486               | -1.600248 | -0.000109 |
| 16               | 6                | 0              | -4.242413               | -0.226838 | -0.000191 |
| 17               | 6                | 0              | -4.901179               | -2.595624 | 0.000069  |
| 18               | 1                | 0              | -4.620320               | -3.642633 | 0.000150  |
| 19               | 6                | 0              | -6.228290               | -2.179581 | 0.000157  |
| 20               | 1                | 0              | -7.026555               | -2.916301 | 0.000299  |
| 21               | 6                | 0              | -6.574681               | -0.817318 | 0.000044  |
| 22               | 1                | 0              | -7.623603               | -0.547196 | 0.000064  |
| 23               | 6                | 0              | -5.590780               | 0.181276  | -0.000129 |
| 24               | 6                | 0              | -2.971339               | 0.493060  | -0.000346 |
| 25               | 7                | 0              | -1.945543               | -0.424719 | -0.000285 |
| 26               | 7                | 0              | -2.850568               | 1.816883  | -0.000283 |
| 27               | 6                | 0              | -1.690930               | 2.466781  | -0.000172 |
| 28               | 6                | 0              | -1.600230               | 3.924451  | -0.000006 |
| 29               | 6                | 0              | -0.817381               | 6.574682  | 0.000342  |
| 30               | 6                | 0              | -0.226831               | 4.242429  | 0.000094  |
| 31               | 6                | 0              | -2.595626               | 4.901111  | 0.000058  |
| 32               | 6                | 0              | -2.179626               | 6.228244  | 0.000228  |
| 33               | 6                | 0              | 0.181245                | 5.590806  | 0.000285  |
| 34               | 1                | 0              | -3.642631               | 4.620238  | -0.000024 |
| 35               | 1                | 0              | -2.916391               | 7.026465  | 0.000272  |
| 36               | 1                | 0              | -0.547288               | 7.623611  | 0.000480  |
| 37               | 6                | 0              | 0.493148                | 2.971451  | -0.000021 |
| 38               | 7                | 0              | -0.424668               | 1.945541  | -0.000168 |
| 39               | 7                | 0              | 1.816915                | 2.850577  | 0.000009  |
| 40               | 6                | 0              | 2.466873                | 1.691024  | -0.000047 |
| 41               | 7                | 0              | 1.945582                | 0.424716  | -0.000052 |
| 42               | 7                | 0              | 2.850587                | -1.816900 | 0.000007  |
| 43               | 6                | 0              | 2.971396                | -0.493034 | -0.000060 |
| 44               | 6                | 0              | 3.924504                | 1.600256  | -0.000003 |
| 45               | 6                | 0              | 6.574715                | 0.817313  | 0.000053  |
| 46               | 6                | 0              | 4.242439                | 0.226835  | -0.000009 |

|    |    |    |   |           |           |           |
|----|----|----|---|-----------|-----------|-----------|
|    | 47 | 6  | 0 | 4.901213  | 2.595620  | 0.000037  |
|    | 48 | 6  | 0 | 6.228322  | 2.179579  | 0.000060  |
|    | 49 | 6  | 0 | 5.590807  | -0.181269 | 0.000025  |
|    | 50 | 1  | 0 | 4.620387  | 3.642638  | 0.000049  |
| 5  | 51 | 1  | 0 | 7.026574  | 2.916311  | 0.000086  |
|    | 52 | 1  | 0 | 7.623632  | 0.547182  | 0.000070  |
|    | 53 | 30 | 0 | -0.000094 | -0.000018 | -0.001062 |
|    | 54 | 8  | 0 | 1.512849  | 5.848728  | 0.000400  |
|    | 55 | 8  | 0 | 5.848703  | -1.512894 | 0.000028  |
| 10 | 56 | 8  | 0 | -1.512910 | -5.848639 | 0.000453  |
|    | 57 | 8  | 0 | -5.848678 | 1.512876  | -0.000340 |
|    | 58 | 6  | 0 | 7.203440  | -1.937721 | 0.000017  |
|    | 59 | 1  | 0 | 7.736613  | -1.590792 | -0.894062 |
|    | 60 | 1  | 0 | 7.173013  | -3.027884 | 0.000012  |
| 15 | 61 | 1  | 0 | 7.736622  | -1.590808 | 0.894096  |
|    | 62 | 6  | 0 | 1.937659  | 7.203476  | 0.000585  |
|    | 63 | 1  | 0 | 1.590796  | 7.736742  | -0.893462 |
|    | 64 | 1  | 0 | 3.027822  | 7.173065  | 0.000673  |
|    | 65 | 1  | 0 | 1.590655  | 7.736542  | 0.894698  |
| 20 | 66 | 6  | 0 | -7.203413 | 1.937704  | 0.001053  |
|    | 67 | 1  | 0 | -7.737288 | 1.591454  | -0.892876 |
|    | 68 | 1  | 0 | -7.172989 | 3.027866  | 0.001828  |
|    | 69 | 1  | 0 | -7.735892 | 1.590104  | 0.895279  |
|    | 70 | 6  | 0 | -1.937742 | -7.203373 | -0.000163 |
| 25 | 71 | 1  | 0 | -1.590288 | -7.736317 | -0.894170 |
|    | 72 | 1  | 0 | -3.027905 | -7.172938 | -0.000797 |
|    | 73 | 1  | 0 | -1.591364 | -7.736787 | 0.893988  |

30 **8b**

Standard orientation:

| Center Number | Atomic Number | Atomic Type | Coordinates (Angstroms) |          |           |           |
|---------------|---------------|-------------|-------------------------|----------|-----------|-----------|
|               |               |             | X                       | Y        | Z         |           |
| 35            | 1             | 6           | 0                       | 4.815068 | 2.930025  | -0.012332 |
|               | 2             | 6           | 0                       | 2.719464 | 4.869333  | 0.065100  |
|               | 3             | 6           | 0                       | 5.080816 | 4.303413  | 0.064316  |
|               | 4             | 6           | 0                       | 3.466592 | 2.519863  | -0.024557 |
| 40            | 5             | 6           | 0                       | 2.450306 | 3.504835  | 0.003694  |
|               | 6             | 6           | 0                       | 4.056857 | 5.257582  | 0.107251  |
|               | 7             | 1           | 0                       | 6.122222 | 4.607657  | 0.082254  |
|               | 8             | 1           | 0                       | 4.316283 | 6.310698  | 0.162546  |
|               | 9             | 1           | 0                       | 1.908419 | 5.588434  | 0.090492  |
| 45            | 10            | 6           | 0                       | 2.774079 | 1.225521  | -0.011347 |
|               | 11            | 6           | 0                       | 1.175812 | 2.795657  | -0.003841 |
|               | 12            | 7           | 0                       | 1.415153 | 1.449258  | -0.009692 |
|               | 13            | 7           | 0                       | 3.384085 | 0.046256  | 0.025246  |
|               | 14            | 6           | 0                       | 2.769598 | -1.135243 | 0.054484  |
| 50            | 15            | 6           | 0                       | 3.455008 | -2.425254 | 0.111099  |
|               | 16            | 6           | 0                       | 2.449624 | -3.414337 | 0.093678  |
|               | 17            | 6           | 0                       | 4.809296 | -2.807888 | 0.189473  |
|               | 18            | 6           | 0                       | 5.101155 | -4.177787 | 0.235749  |



|    |    |    |   |           |           |           |
|----|----|----|---|-----------|-----------|-----------|
|    | 19 | 1  | 0 | 6.129600  | -4.512364 | 0.293977  |
|    | 20 | 6  | 0 | 4.078254  | -5.140848 | 0.207941  |
|    | 21 | 1  | 0 | 4.353954  | -6.190747 | 0.245121  |
|    | 22 | 6  | 0 | 2.737799  | -4.778318 | 0.138656  |
| 5  | 23 | 6  | 0 | 1.174825  | -2.708458 | 0.035939  |
|    | 24 | 7  | 0 | 1.413167  | -1.359409 | 0.022031  |
|    | 25 | 7  | 0 | 0.000045  | -3.329264 | -0.000021 |
|    | 26 | 6  | 0 | -1.174751 | -2.708490 | -0.035903 |
|    | 27 | 6  | 0 | -2.449522 | -3.414402 | -0.093867 |
| 10 | 28 | 6  | 0 | -5.101019 | -4.177916 | -0.236303 |
|    | 29 | 6  | 0 | -3.454937 | -2.425350 | -0.111195 |
|    | 30 | 6  | 0 | -2.737650 | -4.778385 | -0.139121 |
|    | 31 | 6  | 0 | -4.078086 | -5.140947 | -0.208577 |
|    | 32 | 6  | 0 | -4.809204 | -2.808018 | -0.189767 |
| 15 | 33 | 1  | 0 | -1.941054 | -5.513282 | -0.123570 |
|    | 34 | 1  | 0 | -4.353747 | -6.190849 | -0.245961 |
|    | 35 | 1  | 0 | -6.129446 | -4.512518 | -0.294685 |
|    | 36 | 6  | 0 | -2.769574 | -1.135324 | -0.054291 |
|    | 37 | 7  | 0 | -1.413142 | -1.359448 | -0.021857 |
| 20 | 38 | 7  | 0 | -3.384110 | 0.046151  | -0.024953 |
|    | 39 | 6  | 0 | -2.774176 | 1.225454  | 0.011770  |
|    | 40 | 7  | 0 | -1.415255 | 1.449215  | 0.010103  |
|    | 41 | 7  | 0 | -0.000075 | 3.416294  | -0.000026 |
|    | 42 | 6  | 0 | -1.175944 | 2.795616  | 0.003955  |
| 25 | 43 | 6  | 0 | -3.466745 | 2.519790  | 0.024684  |
|    | 44 | 6  | 0 | -4.056889 | 5.257535  | -0.108251 |
|    | 45 | 6  | 0 | -2.450445 | 3.504763  | -0.003861 |
|    | 46 | 6  | 0 | -4.815217 | 2.930036  | 0.012354  |
|    | 47 | 6  | 0 | -5.080866 | 4.303428  | -0.064933 |
| 30 | 48 | 6  | 0 | -2.719515 | 4.869243  | -0.065823 |
|    | 49 | 1  | 0 | -6.122262 | 4.607699  | -0.082935 |
|    | 50 | 1  | 0 | -4.316283 | 6.310635  | -0.164007 |
|    | 51 | 30 | 0 | -0.000013 | 0.044804  | 0.000560  |
|    | 52 | 8  | 0 | -5.743998 | -1.826248 | -0.219132 |
| 35 | 53 | 8  | 0 | 5.897505  | 2.099119  | -0.027870 |
|    | 54 | 6  | 0 | -7.107271 | -2.191681 | -0.383453 |
|    | 55 | 1  | 0 | -7.660898 | -1.253771 | -0.433202 |
|    | 56 | 1  | 0 | -7.472455 | -2.786070 | 0.463546  |
|    | 57 | 1  | 0 | -7.263100 | -2.753504 | -1.312372 |
| 40 | 58 | 6  | 0 | 6.049486  | 1.252051  | -1.175916 |
|    | 59 | 1  | 0 | 5.951323  | 1.836539  | -2.099220 |
|    | 60 | 1  | 0 | 5.330860  | 0.432009  | -1.156576 |
|    | 61 | 1  | 0 | 7.064909  | 0.854434  | -1.115375 |
|    | 62 | 1  | 0 | -1.908416 | 5.588274  | -0.091464 |
| 45 | 63 | 1  | 0 | 1.941226  | -5.513239 | 0.123042  |
|    | 64 | 8  | 0 | -5.897847 | 2.099450  | 0.028501  |
|    | 65 | 8  | 0 | 5.744070  | -1.826109 | 0.218926  |
|    | 66 | 6  | 0 | 7.107313  | -2.191555 | 0.383467  |
|    | 67 | 1  | 0 | 7.262935  | -2.753627 | 1.312268  |
| 50 | 68 | 1  | 0 | 7.660906  | -1.253646 | 0.433602  |
|    | 69 | 1  | 0 | 7.472716  | -2.785701 | -0.463609 |
|    | 70 | 6  | 0 | -6.049248 | 1.251731  | 1.176140  |
|    | 71 | 1  | 0 | -7.065077 | 0.855012  | 1.116428  |
|    | 72 | 1  | 0 | -5.949618 | 1.835522  | 2.099726  |

73                    1                    0                    -5.331280                    0.431155                    1.155506

---

5

**8c**

10 Standard orientation:

---

|    | Center<br>Number | Atomic<br>Number | Atomic<br>Type | Coordinates (Angstroms) |           |           |
|----|------------------|------------------|----------------|-------------------------|-----------|-----------|
|    |                  |                  |                | X                       | Y         | Z         |
| 15 | 1                | 6                | 0              | -4.339918               | -3.967101 | -0.011665 |
|    | 2                | 6                | 0              | -5.627435               | -1.412476 | -0.051340 |
|    | 3                | 6                | 0              | -5.726122               | -3.855367 | -0.036741 |
|    | 4                | 6                | 0              | -3.607067               | -2.780564 | -0.006382 |
|    | 5                | 6                | 0              | -4.222330               | -1.512281 | -0.025766 |
| 20 | 6                | 6                | 0              | -6.365758               | -2.604288 | -0.056304 |
|    | 7                | 1                | 0              | -6.340613               | -4.751008 | -0.041638 |
|    | 8                | 1                | 0              | -7.448231               | -2.573398 | -0.075612 |
|    | 9                | 6                | 0              | -2.166392               | -2.542394 | 0.015510  |
|    | 10               | 6                | 0              | -3.144193               | -0.527123 | -0.013812 |
| 25 | 11               | 7                | 0              | -1.939207               | -1.191452 | 0.010576  |
|    | 12               | 7                | 0              | -1.266999               | -3.520722 | 0.031780  |
|    | 13               | 6                | 0              | 0.048938                | -3.324870 | 0.037935  |
|    | 14               | 6                | 0              | 1.019363                | -4.415504 | 0.044745  |
|    | 15               | 6                | 0              | 2.295473                | -3.815764 | 0.036507  |
| 30 | 16               | 6                | 0              | 0.843423                | -5.799175 | 0.054249  |
|    | 17               | 1                | 0              | -0.150565               | -6.231475 | 0.059594  |
|    | 18               | 6                | 0              | 1.991740                | -6.583613 | 0.056532  |
|    | 19               | 1                | 0              | 1.906908                | -7.666446 | 0.064405  |
|    | 20               | 6                | 0              | 3.275971                | -6.012525 | 0.048760  |
| 35 | 21               | 1                | 0              | 4.137291                | -6.669113 | 0.050917  |
|    | 22               | 6                | 0              | 3.451136                | -4.621900 | 0.038174  |
|    | 23               | 6                | 0              | 2.076005                | -2.372373 | 0.025112  |
|    | 24               | 7                | 0              | 0.720227                | -2.131967 | 0.029695  |
|    | 25               | 7                | 0              | 3.042435                | -1.460566 | 0.002820  |
| 40 | 26               | 6                | 0              | 2.840880                | -0.147458 | -0.013562 |
|    | 27               | 6                | 0              | 3.932507                | 0.818926  | -0.064363 |
|    | 28               | 6                | 0              | 5.543237                | 3.058004  | -0.195536 |
|    | 29               | 6                | 0              | 3.338732                | 2.097875  | -0.073626 |
|    | 30               | 6                | 0              | 5.313231                | 0.629799  | -0.113568 |
| 45 | 31               | 6                | 0              | 6.105990                | 1.770262  | -0.177477 |
|    | 32               | 6                | 0              | 4.155127                | 3.244399  | -0.145519 |
|    | 33               | 1                | 0              | 5.731695                | -0.370101 | -0.105318 |
|    | 34               | 1                | 0              | 7.187472                | 1.677243  | -0.217654 |
|    | 35               | 1                | 0              | 6.204209                | 3.914310  | -0.249320 |
| 50 | 36               | 6                | 0              | 1.892825                | 1.884140  | -0.021532 |
|    | 37               | 7                | 0              | 1.650413                | 0.530715  | 0.005847  |
|    | 38               | 7                | 0              | 0.984279                | 2.857931  | -0.002325 |
|    | 39               | 6                | 0              | -0.332405               | 2.675207  | 0.018328  |

|    |    |    |   |           |           |           |
|----|----|----|---|-----------|-----------|-----------|
|    | 40 | 7  | 0 | -0.993220 | 1.468102  | 0.017805  |
|    | 41 | 7  | 0 | -3.324323 | 0.789390  | -0.028475 |
|    | 42 | 6  | 0 | -2.343670 | 1.686082  | -0.014295 |
|    | 43 | 6  | 0 | -1.324545 | 3.757924  | 0.002683  |
| 5  | 44 | 6  | 0 | -3.713715 | 5.214080  | -0.194659 |
|    | 45 | 6  | 0 | -2.589122 | 3.123357  | -0.042424 |
|    | 46 | 6  | 0 | -1.268537 | 5.166345  | -0.025473 |
|    | 47 | 6  | 0 | -2.476474 | 5.867626  | -0.134988 |
|    | 48 | 6  | 0 | -3.788088 | 3.824157  | -0.136266 |
| 10 | 49 | 1  | 0 | -2.420624 | 6.950897  | -0.164828 |
|    | 50 | 1  | 0 | -4.621126 | 5.805434  | -0.275608 |
|    | 51 | 30 | 0 | -0.141142 | -0.332806 | 0.053700  |
|    | 52 | 8  | 0 | 3.545825  | 4.456244  | -0.165114 |
|    | 53 | 8  | 0 | 4.655961  | -4.000094 | 0.030123  |
| 15 | 54 | 6  | 0 | 4.349574  | 5.617106  | -0.321578 |
|    | 55 | 1  | 0 | 5.032798  | 5.754558  | 0.526104  |
|    | 56 | 1  | 0 | 3.653688  | 6.455336  | -0.365177 |
|    | 57 | 1  | 0 | 4.930948  | 5.581083  | -1.250941 |
|    | 58 | 6  | 0 | 5.829279  | -4.800202 | 0.031214  |
| 20 | 59 | 1  | 0 | 5.890585  | -5.427511 | 0.929347  |
|    | 60 | 1  | 0 | 6.665738  | -4.100503 | 0.023629  |
|    | 61 | 1  | 0 | 5.884145  | -5.439340 | -0.858952 |
|    | 62 | 1  | 0 | -4.730564 | 3.289309  | -0.173905 |
|    | 63 | 1  | 0 | -3.839121 | -4.928321 | 0.003179  |
| 25 | 64 | 8  | 0 | -0.129536 | 5.917790  | 0.005117  |
|    | 65 | 6  | 0 | 0.709061  | 5.780779  | 1.161029  |
|    | 66 | 1  | 0 | 1.416006  | 6.611983  | 1.111298  |
|    | 67 | 1  | 0 | 1.250280  | 4.834143  | 1.143415  |
|    | 68 | 1  | 0 | 0.114858  | 5.874622  | 2.078667  |
| 30 | 69 | 8  | 0 | -6.172974 | -0.171666 | -0.069094 |
|    | 70 | 6  | 0 | -7.588278 | -0.055669 | -0.094277 |
|    | 71 | 1  | 0 | -8.016289 | -0.516684 | -0.993206 |
|    | 72 | 1  | 0 | -7.798225 | 1.014391  | -0.104311 |
|    | 73 | 1  | 0 | -8.047120 | -0.505945 | 0.794848  |

-----

## 8d

Standard orientation:

| ----- |               |               |             |                         |          |           |
|-------|---------------|---------------|-------------|-------------------------|----------|-----------|
| 40    | Center Number | Atomic Number | Atomic Type | Coordinates (Angstroms) |          |           |
|       |               |               |             | X                       | Y        | Z         |
| ----- |               |               |             |                         |          |           |
|       | 1             | 6             | 0           | 4.438131                | 3.048129 | -0.028980 |
|       | 2             | 6             | 0           | 2.199424                | 4.818892 | -0.143993 |
| 45    | 3             | 6             | 0           | 4.596966                | 4.435541 | -0.141975 |
|       | 4             | 6             | 0           | 3.125303                | 2.535012 | -0.000102 |
|       | 5             | 6             | 0           | 2.037614                | 3.439877 | -0.046852 |
|       | 6             | 6             | 0           | 3.502762                | 5.307381 | -0.204036 |
|       | 7             | 1             | 0           | 5.612070                | 4.817780 | -0.172113 |
| 50    | 8             | 1             | 0           | 3.681174                | 6.375468 | -0.287704 |
|       | 9             | 1             | 0           | 1.331724                | 5.467991 | -0.182835 |
|       | 10            | 6             | 0           | 2.529795                | 1.192528 | 0.016818  |
|       | 11            | 6             | 0           | 0.818506                | 2.640086 | -0.017818 |

|    |    |    |   |           |           |           |
|----|----|----|---|-----------|-----------|-----------|
|    | 12 | 7  | 0 | 1.158786  | 1.315568  | 0.015785  |
|    | 13 | 7  | 0 | 3.222701  | 0.058567  | -0.001922 |
|    | 14 | 6  | 0 | 2.694386  | -1.164142 | -0.021032 |
|    | 15 | 6  | 0 | 3.470160  | -2.402888 | -0.067577 |
| 5  | 16 | 6  | 0 | 2.537312  | -3.460859 | -0.058317 |
|    | 17 | 6  | 0 | 4.848597  | -2.689994 | -0.133376 |
|    | 18 | 6  | 0 | 5.236838  | -4.035764 | -0.176088 |
|    | 19 | 1  | 0 | 6.286884  | -4.296415 | -0.224848 |
|    | 20 | 6  | 0 | 4.284246  | -5.068758 | -0.157388 |
| 10 | 21 | 1  | 0 | 4.633514  | -6.096652 | -0.191600 |
|    | 22 | 6  | 0 | 2.921220  | -4.801141 | -0.100566 |
|    | 23 | 6  | 0 | 1.214873  | -2.847932 | -0.013974 |
|    | 24 | 7  | 0 | 1.356925  | -1.485482 | 0.002699  |
|    | 25 | 7  | 0 | 0.087145  | -3.552475 | 0.000592  |
| 15 | 26 | 6  | 0 | -1.129765 | -3.017942 | 0.019697  |
|    | 27 | 6  | 0 | -2.353958 | -3.813321 | 0.028866  |
|    | 28 | 6  | 0 | -4.953374 | -4.755982 | 0.044823  |
|    | 29 | 6  | 0 | -3.425892 | -2.897228 | 0.036712  |
|    | 30 | 6  | 0 | -2.551078 | -5.194208 | 0.028293  |
| 20 | 31 | 6  | 0 | -3.866155 | -5.646556 | 0.036735  |
|    | 32 | 6  | 0 | -4.753706 | -3.368531 | 0.044488  |
|    | 33 | 1  | 0 | -1.707342 | -5.874700 | 0.021349  |
|    | 34 | 1  | 0 | -4.070843 | -6.713282 | 0.037014  |
|    | 35 | 1  | 0 | -5.957913 | -5.160756 | 0.051192  |
| 25 | 36 | 6  | 0 | -2.832589 | -1.563080 | 0.031132  |
|    | 37 | 7  | 0 | -1.462334 | -1.689338 | 0.024293  |
|    | 38 | 7  | 0 | -3.525614 | -0.427950 | 0.024995  |
|    | 39 | 6  | 0 | -2.982631 | 0.783709  | 0.009966  |
|    | 40 | 7  | 0 | -1.654308 | 1.119444  | 0.005197  |
| 30 | 41 | 7  | 0 | -0.395513 | 3.181491  | -0.031956 |
|    | 42 | 6  | 0 | -1.529671 | 2.489363  | -0.017338 |
|    | 43 | 6  | 0 | -3.778663 | 2.008597  | -0.009556 |
|    | 44 | 6  | 0 | -4.727650 | 4.603645  | -0.052856 |
|    | 45 | 6  | 0 | -2.865100 | 3.081654  | -0.027362 |
| 35 | 46 | 6  | 0 | -5.159657 | 2.200232  | -0.013437 |
|    | 47 | 6  | 0 | -5.615413 | 3.514407  | -0.035296 |
|    | 48 | 6  | 0 | -3.339196 | 4.407919  | -0.049259 |
|    | 49 | 1  | 0 | -5.833925 | 1.351571  | 0.000133  |
|    | 50 | 1  | 0 | -6.682608 | 3.716908  | -0.039025 |
| 40 | 51 | 1  | 0 | -5.134899 | 5.607090  | -0.069500 |
|    | 52 | 30 | 0 | -0.151463 | -0.185648 | 0.042487  |
|    | 53 | 8  | 0 | -5.750742 | -2.449832 | 0.051593  |
|    | 54 | 8  | 0 | -2.423230 | 5.407341  | -0.064841 |
|    | 55 | 8  | 0 | 5.583250  | 2.306228  | 0.004392  |
| 45 | 56 | 6  | 0 | -2.887745 | 6.749322  | -0.084514 |
|    | 57 | 1  | 0 | -3.484482 | 6.983887  | 0.805848  |
|    | 58 | 1  | 0 | -3.482781 | 6.958387  | -0.982315 |
|    | 59 | 1  | 0 | -1.993301 | 7.373124  | -0.092563 |
|    | 60 | 6  | 0 | -7.093943 | -2.910948 | 0.057903  |
| 50 | 61 | 1  | 0 | -7.312894 | -3.507154 | 0.952594  |
|    | 62 | 1  | 0 | -7.321769 | -3.505471 | -0.835679 |
|    | 63 | 1  | 0 | -7.715549 | -2.014929 | 0.061881  |
|    | 64 | 6  | 0 | 5.792788  | 1.485053  | 1.161867  |
|    | 65 | 1  | 0 | 5.631017  | 2.065904  | 2.078559  |

|   |    |   |   |          |           |           |
|---|----|---|---|----------|-----------|-----------|
|   | 66 | 1 | 0 | 6.840227 | 1.178076  | 1.118598  |
|   | 67 | 1 | 0 | 5.148716 | 0.605310  | 1.141227  |
|   | 68 | 1 | 0 | 2.177782 | -5.589884 | -0.092318 |
|   | 69 | 8 | 0 | 5.712961 | -1.645054 | -0.154647 |
| 5 | 70 | 6 | 0 | 7.100084 | -1.914534 | -0.301978 |
|   | 71 | 1 | 0 | 7.587749 | -0.940326 | -0.344686 |
|   | 72 | 1 | 0 | 7.306646 | -2.463294 | -1.228891 |
|   | 73 | 1 | 0 | 7.495361 | -2.482681 | 0.549545  |

---

10

15

### 9a

Standard orientation:

---

| 20 | Center<br>Number | Atomic<br>Number | Atomic<br>Type | Coordinates (Angstroms) |           |           |
|----|------------------|------------------|----------------|-------------------------|-----------|-----------|
|    |                  |                  |                | X                       | Y         | Z         |
|    | 1                | 6                | 0              | -5.575644               | -0.333525 | -0.000561 |
|    | 2                | 6                | 0              | -4.634542               | -3.051640 | -0.000091 |
| 25 | 3                | 6                | 0              | -6.456540               | -1.426247 | -0.000376 |
|    | 4                | 6                | 0              | -4.198538               | -0.635380 | -0.000397 |
|    | 5                | 6                | 0              | -3.751112               | -1.974977 | -0.000203 |
|    | 6                | 6                | 0              | -5.993936               | -2.751825 | -0.000160 |
|    | 7                | 1                | 0              | -7.526686               | -1.260575 | -0.000380 |
| 30 | 8                | 1                | 0              | -6.724706               | -3.555464 | -0.000039 |
|    | 9                | 1                | 0              | -4.267155               | -4.071694 | 0.000057  |
|    | 10               | 6                | 0              | -2.998499               | 0.193759  | -0.000392 |
|    | 11               | 6                | 0              | -2.291606               | -1.928467 | -0.000156 |
|    | 12               | 7                | 0              | -1.890653               | -0.619837 | -0.000238 |
| 35 | 13               | 7                | 0              | -3.014467               | 1.523003  | -0.000341 |
|    | 14               | 6                | 0              | -1.928564               | 2.291673  | -0.000270 |
|    | 15               | 6                | 0              | -1.974982               | 3.751133  | 0.000176  |
|    | 16               | 6                | 0              | -0.635358               | 4.198519  | 0.000302  |
|    | 17               | 6                | 0              | -3.051625               | 4.634617  | 0.000539  |
| 40 | 18               | 1                | 0              | -4.071689               | 4.267262  | 0.000464  |
|    | 19               | 6                | 0              | -2.751765               | 5.993983  | 0.000975  |
|    | 20               | 1                | 0              | -3.555372               | 6.724787  | 0.001192  |
|    | 21               | 6                | 0              | -1.426158               | 6.456548  | 0.001142  |
|    | 22               | 1                | 0              | -1.260468               | 7.526691  | 0.001420  |
| 45 | 23               | 6                | 0              | -0.333457               | 5.575647  | 0.000928  |
|    | 24               | 6                | 0              | 0.193671                | 2.998459  | -0.000168 |
|    | 25               | 7                | 0              | -0.619830               | 1.890669  | -0.000492 |
|    | 26               | 7                | 0              | 1.523042                | 3.014472  | -0.000298 |
|    | 27               | 6                | 0              | 2.291676                | 1.928693  | -0.000455 |
| 50 | 28               | 6                | 0              | 3.751180                | 1.975017  | -0.000632 |
|    | 29               | 6                | 0              | 6.456570                | 1.426108  | -0.001004 |
|    | 30               | 6                | 0              | 4.198519                | 0.635388  | -0.000687 |
|    | 31               | 6                | 0              | 4.634686                | 3.051623  | -0.000742 |

|    |    |    |   |           |           |           |
|----|----|----|---|-----------|-----------|-----------|
|    | 32 | 6  | 0 | 5.994059  | 2.751715  | -0.000931 |
|    | 33 | 6  | 0 | 5.575598  | 0.333441  | -0.000885 |
|    | 34 | 1  | 0 | 4.267368  | 4.071702  | -0.000687 |
|    | 35 | 1  | 0 | 6.724889  | 3.555300  | -0.001027 |
| 5  | 36 | 1  | 0 | 7.526703  | 1.260357  | -0.001157 |
|    | 37 | 6  | 0 | 2.998361  | -0.193600 | -0.000512 |
|    | 38 | 7  | 0 | 1.890678  | 0.619852  | -0.000360 |
|    | 39 | 7  | 0 | 3.014482  | -1.523004 | -0.000369 |
|    | 40 | 6  | 0 | 1.928597  | -2.291574 | -0.000190 |
| 10 | 41 | 7  | 0 | 0.619840  | -1.890599 | -0.000402 |
|    | 42 | 7  | 0 | -1.522996 | -3.014461 | 0.000037  |
|    | 43 | 6  | 0 | -0.193708 | -2.998374 | 0.000027  |
|    | 44 | 6  | 0 | 1.974993  | -3.751108 | 0.000365  |
|    | 45 | 6  | 0 | 1.426190  | -6.456507 | 0.001508  |
| 15 | 46 | 6  | 0 | 0.635393  | -4.198487 | 0.000531  |
|    | 47 | 6  | 0 | 3.051627  | -4.634553 | 0.000761  |
|    | 48 | 6  | 0 | 2.751766  | -5.993954 | 0.001317  |
|    | 49 | 6  | 0 | 0.333490  | -5.575554 | 0.001149  |
|    | 50 | 1  | 0 | 4.071691  | -4.267199 | 0.000645  |
| 20 | 51 | 1  | 0 | 3.555386  | -6.724745 | 0.001624  |
|    | 52 | 1  | 0 | 1.260462  | -7.526644 | 0.001954  |
|    | 53 | 30 | 0 | 0.000025  | -0.000022 | -0.001148 |
|    | 54 | 6  | 0 | -1.213826 | -7.923916 | 0.002636  |
|    | 55 | 1  | 0 | -0.709090 | -8.293064 | -0.893284 |
| 25 | 56 | 1  | 0 | -2.241420 | -8.293681 | 0.003023  |
|    | 57 | 1  | 0 | -0.708847 | -8.291844 | 0.898920  |
|    | 58 | 6  | 0 | 7.923917  | -1.213914 | -0.001465 |
|    | 59 | 1  | 0 | 8.292222  | -0.708994 | -0.897627 |
|    | 60 | 1  | 0 | 8.293632  | -2.241525 | -0.001653 |
| 30 | 61 | 1  | 0 | 8.292713  | -0.709140 | 0.894577  |
|    | 62 | 6  | 0 | 1.213834  | 7.923967  | 0.004413  |
|    | 63 | 1  | 0 | 0.710256  | 8.294186  | -0.891715 |
|    | 64 | 1  | 0 | 2.241455  | 8.293642  | 0.006603  |
|    | 65 | 1  | 0 | 0.707713  | 8.290823  | 0.900489  |
| 35 | 66 | 6  | 0 | -7.924007 | 1.213784  | -0.002579 |
|    | 67 | 1  | 0 | -8.291621 | 0.708014  | -0.898544 |
|    | 68 | 1  | 0 | -8.293750 | 2.241384  | -0.004016 |
|    | 69 | 1  | 0 | -8.293448 | 0.709830  | 0.893659  |
|    | 70 | 16 | 0 | 6.105330  | -1.365053 | -0.000992 |
| 40 | 71 | 16 | 0 | 1.364919  | 6.105325  | 0.001381  |
|    | 72 | 16 | 0 | -6.105410 | 1.364948  | -0.000982 |
|    | 73 | 16 | 0 | -1.365041 | -6.105361 | 0.001451  |

45 **9b**

Standard orientation:

| Center<br>Number | Atomic<br>Number | Atomic<br>Type | Coordinates (Angstroms) |          |          |           |
|------------------|------------------|----------------|-------------------------|----------|----------|-----------|
|                  |                  |                | X                       | Y        | Z        |           |
| 50               | 1                | 6              | 0                       | 4.807459 | 2.964169 | -0.315108 |
|                  | 2                | 6              | 0                       | 2.688644 | 4.876724 | -0.123004 |
|                  | 3                | 6              | 0                       | 5.046562 | 4.346840 | -0.298828 |

|    |    |    |   |           |           |           |
|----|----|----|---|-----------|-----------|-----------|
|    | 4  | 6  | 0 | 3.468677  | 2.535148  | -0.186381 |
|    | 5  | 6  | 0 | 2.440266  | 3.506712  | -0.126834 |
|    | 6  | 6  | 0 | 4.014990  | 5.289230  | -0.189418 |
|    | 7  | 1  | 0 | 6.071782  | 4.687994  | -0.399141 |
| 5  | 8  | 1  | 0 | 4.260309  | 6.347018  | -0.185400 |
|    | 9  | 1  | 0 | 1.865439  | 5.580390  | -0.065640 |
|    | 10 | 6  | 0 | 2.786804  | 1.232479  | -0.079530 |
|    | 11 | 6  | 0 | 1.176389  | 2.791418  | -0.047312 |
|    | 12 | 7  | 0 | 1.426826  | 1.448132  | -0.025599 |
| 10 | 13 | 7  | 0 | 3.394485  | 0.050065  | 0.008400  |
|    | 14 | 6  | 0 | 2.771350  | -1.124648 | 0.101845  |
|    | 15 | 6  | 0 | 3.451303  | -2.413551 | 0.259611  |
|    | 16 | 6  | 0 | 2.438909  | -3.396974 | 0.213676  |
|    | 17 | 6  | 0 | 4.796753  | -2.792342 | 0.461855  |
| 15 | 18 | 6  | 0 | 5.058425  | -4.168607 | 0.560401  |
|    | 19 | 1  | 0 | 6.073763  | -4.514916 | 0.707476  |
|    | 20 | 6  | 0 | 4.038833  | -5.128646 | 0.484786  |
|    | 21 | 1  | 0 | 4.304425  | -6.178435 | 0.569153  |
|    | 22 | 6  | 0 | 2.707891  | -4.758800 | 0.319592  |
| 20 | 23 | 6  | 0 | 1.172717  | -2.690925 | 0.071264  |
|    | 24 | 7  | 0 | 1.415364  | -1.345477 | 0.022625  |
|    | 25 | 7  | 0 | -0.000128 | -3.311628 | 0.000012  |
|    | 26 | 6  | 0 | -1.172935 | -2.690872 | -0.071398 |
|    | 27 | 6  | 0 | -2.439211 | -3.396873 | -0.213322 |
| 25 | 28 | 6  | 0 | -5.058873 | -4.168415 | -0.559174 |
|    | 29 | 6  | 0 | -3.451536 | -2.413384 | -0.259416 |
|    | 30 | 6  | 0 | -2.708338 | -4.758719 | -0.318626 |
|    | 31 | 6  | 0 | -4.039352 | -5.128515 | -0.483374 |
|    | 32 | 6  | 0 | -4.797050 | -2.792132 | -0.461281 |
| 30 | 33 | 1  | 0 | -1.905620 | -5.486173 | -0.277402 |
|    | 34 | 1  | 0 | -4.305057 | -6.178316 | -0.567224 |
|    | 35 | 1  | 0 | -6.074280 | -4.514691 | -0.705858 |
|    | 36 | 6  | 0 | -2.771456 | -1.124488 | -0.102206 |
|    | 37 | 7  | 0 | -1.415469 | -1.345390 | -0.023174 |
| 35 | 38 | 7  | 0 | -3.394484 | 0.050278  | -0.008730 |
|    | 39 | 6  | 0 | -2.786689 | 1.232641  | 0.079096  |
|    | 40 | 7  | 0 | -1.426705 | 1.448208  | 0.024989  |
|    | 41 | 7  | 0 | 0.000125  | 3.407564  | -0.000096 |
|    | 42 | 6  | 0 | -1.176173 | 2.791475  | 0.046996  |
| 40 | 43 | 6  | 0 | -3.468449 | 2.535325  | 0.186511  |
|    | 44 | 6  | 0 | -4.014526 | 5.289465  | 0.190698  |
|    | 45 | 6  | 0 | -2.439982 | 3.506828  | 0.127030  |
|    | 46 | 6  | 0 | -4.807165 | 2.964420  | 0.315730  |
|    | 47 | 6  | 0 | -5.046148 | 4.347114  | 0.300021  |
| 45 | 48 | 6  | 0 | -2.688238 | 4.876866  | 0.123785  |
|    | 49 | 1  | 0 | -6.071319 | 4.688311  | 0.400685  |
|    | 50 | 1  | 0 | -4.259757 | 6.347276  | 0.187133  |
|    | 51 | 30 | 0 | 0.000004  | 0.055064  | -0.001854 |
|    | 52 | 6  | 0 | -7.547396 | -2.516949 | -0.973654 |
| 50 | 53 | 1  | 0 | -8.336653 | -1.775116 | -1.112943 |
|    | 54 | 1  | 0 | -7.822660 | -3.169477 | -0.141535 |
|    | 55 | 1  | 0 | -7.447303 | -3.099429 | -1.892548 |
|    | 56 | 6  | 0 | 5.849653  | 0.966599  | -1.998217 |
|    | 57 | 1  | 0 | 5.034354  | 0.268525  | -1.812944 |

|    |    |    |   |           |           |           |
|----|----|----|---|-----------|-----------|-----------|
|    | 58 | 1  | 0 | 6.754748  | 0.405491  | -2.239643 |
|    | 59 | 1  | 0 | 5.614386  | 1.644975  | -2.820712 |
|    | 60 | 1  | 0 | -1.864981 | 5.580477  | 0.066489  |
|    | 61 | 1  | 0 | 1.905117  | -5.486200 | 0.278501  |
| 5  | 62 | 6  | 0 | 7.547286  | -2.517282 | 0.973286  |
|    | 63 | 1  | 0 | 7.447820  | -3.099235 | 1.892585  |
|    | 64 | 1  | 0 | 8.336786  | -1.775515 | 1.111535  |
|    | 65 | 1  | 0 | 7.821774  | -3.170321 | 0.141313  |
|    | 66 | 6  | 0 | -5.849475 | 0.966818  | 1.998693  |
| 10 | 67 | 1  | 0 | -5.615540 | 1.645129  | 2.821618  |
|    | 68 | 1  | 0 | -5.033286 | 0.269691  | 1.813722  |
|    | 69 | 1  | 0 | -6.754058 | 0.404502  | 2.239197  |
|    | 70 | 16 | 0 | 6.241904  | 1.913672  | -0.481545 |
|    | 71 | 16 | 0 | 6.045504  | -1.542545 | 0.619730  |
| 15 | 72 | 16 | 0 | -6.045701 | -1.542275 | -0.619513 |
|    | 73 | 16 | 0 | -6.241701 | 1.913957  | 0.482045  |

20

25 **9c**

Standard orientation:

| Center Number | Atomic Number | Atomic Type | Coordinates (Angstroms) |           |           |           |
|---------------|---------------|-------------|-------------------------|-----------|-----------|-----------|
|               |               |             | X                       | Y         | Z         |           |
| 30            | 1             | 6           | 0                       | -3.950554 | -4.561443 | -0.105264 |
|               | 2             | 6           | 0                       | -5.488459 | -2.132562 | -0.176604 |
|               | 3             | 6           | 0                       | -5.341093 | -4.582443 | -0.167943 |
|               | 4             | 6           | 0                       | -3.338241 | -3.311077 | -0.078997 |
| 35            | 5             | 6           | 0                       | -4.080257 | -2.110775 | -0.112906 |
|               | 6             | 6           | 0                       | -6.094484 | -3.398486 | -0.202990 |
|               | 7             | 1           | 0                       | -5.867124 | -5.532449 | -0.190997 |
|               | 8             | 1           | 0                       | -7.172943 | -3.482433 | -0.251624 |
|               | 9             | 6           | 0                       | -1.929090 | -2.931072 | -0.018169 |
| 40            | 10            | 6           | 0                       | -3.102395 | -1.029044 | -0.069006 |
|               | 11            | 7           | 0                       | -1.838157 | -1.564863 | -0.017878 |
|               | 12            | 7           | 0                       | -0.935188 | -3.813367 | 0.027494  |
|               | 13            | 6           | 0                       | 0.350967  | -3.476973 | 0.062822  |
|               | 14            | 6           | 0                       | 1.436760  | -4.453370 | 0.108765  |
| 45            | 15            | 6           | 0                       | 2.641633  | -3.718010 | 0.114768  |
|               | 16            | 6           | 0                       | 1.418682  | -5.845351 | 0.139376  |
|               | 17            | 1           | 0                       | 0.481036  | -6.389576 | 0.132820  |
|               | 18            | 6           | 0                       | 2.650791  | -6.492329 | 0.178839  |
|               | 19            | 1           | 0                       | 2.691138  | -7.577439 | 0.204721  |
| 50            | 20            | 6           | 0                       | 3.858299  | -5.776607 | 0.186256  |
|               | 21            | 1           | 0                       | 4.783111  | -6.338996 | 0.217712  |
|               | 22            | 6           | 0                       | 3.889065  | -4.373419 | 0.154014  |
|               | 23            | 6           | 0                       | 2.257630  | -2.311242 | 0.071382  |



|    |    |    |   |           |           |           |
|----|----|----|---|-----------|-----------|-----------|
|    | 24 | 7  | 0 | 0.886969  | -2.217632 | 0.048921  |
|    | 25 | 7  | 0 | 3.125266  | -1.307541 | 0.034172  |
|    | 26 | 6  | 0 | 2.793025  | -0.019458 | -0.016996 |
|    | 27 | 6  | 0 | 3.774954  | 1.048515  | -0.141903 |
| 5  | 28 | 6  | 0 | 5.137720  | 3.417583  | -0.470671 |
|    | 29 | 6  | 0 | 3.053660  | 2.262074  | -0.197161 |
|    | 30 | 6  | 0 | 5.163576  | 0.993509  | -0.231331 |
|    | 31 | 6  | 0 | 5.833647  | 2.202608  | -0.386938 |
|    | 32 | 6  | 0 | 3.737377  | 3.482533  | -0.390936 |
| 10 | 33 | 1  | 0 | 5.683513  | 0.043325  | -0.186179 |
|    | 34 | 1  | 0 | 6.917414  | 2.217447  | -0.457980 |
|    | 35 | 1  | 0 | 5.711881  | 4.325013  | -0.610111 |
|    | 36 | 6  | 0 | 1.639896  | 1.900576  | -0.064411 |
|    | 37 | 7  | 0 | 1.540629  | 0.529635  | 0.017026  |
| 15 | 38 | 7  | 0 | 0.637951  | 2.778261  | -0.001905 |
|    | 39 | 6  | 0 | -0.656584 | 2.465991  | 0.052067  |
|    | 40 | 7  | 0 | -1.182001 | 1.192960  | -0.002977 |
|    | 41 | 7  | 0 | -3.421586 | 0.258937  | -0.068164 |
|    | 42 | 6  | 0 | -2.546499 | 1.260982  | -0.020516 |
| 20 | 43 | 6  | 0 | -1.767783 | 3.432627  | 0.114720  |
|    | 44 | 6  | 0 | -4.319981 | 4.601085  | 0.032548  |
|    | 45 | 6  | 0 | -2.949903 | 2.656838  | 0.027604  |
|    | 46 | 6  | 0 | -1.879427 | 4.835205  | 0.229966  |
|    | 47 | 6  | 0 | -3.167968 | 5.387506  | 0.170680  |
| 25 | 48 | 6  | 0 | -4.225056 | 3.214640  | -0.018762 |
|    | 49 | 1  | 0 | -3.265352 | 6.464551  | 0.260699  |
|    | 50 | 1  | 0 | -5.291409 | 5.085004  | -0.004305 |
|    | 51 | 30 | 0 | -0.149845 | -0.512690 | 0.047769  |
|    | 52 | 6  | 0 | 4.117835  | 6.221684  | -0.894520 |
| 30 | 53 | 1  | 0 | 4.803642  | 6.333836  | -0.051256 |
|    | 54 | 1  | 0 | 3.583096  | 7.162873  | -1.038980 |
|    | 55 | 1  | 0 | 4.675134  | 5.991228  | -1.805598 |
|    | 56 | 6  | 0 | 6.680109  | -4.701945 | 0.243245  |
|    | 57 | 1  | 0 | 6.604795  | -5.299631 | 1.154662  |
| 35 | 58 | 1  | 0 | 7.624243  | -4.153383 | 0.261190  |
|    | 59 | 1  | 0 | 6.668830  | -5.350416 | -0.635962 |
|    | 60 | 1  | 0 | -5.097407 | 2.574651  | -0.094746 |
|    | 61 | 1  | 0 | -3.359890 | -5.470168 | -0.078188 |
|    | 62 | 6  | 0 | 0.253114  | 5.389396  | 1.976168  |
| 40 | 63 | 1  | 0 | -0.484083 | 5.326919  | 2.779186  |
|    | 64 | 1  | 0 | 1.007532  | 6.135227  | 2.234822  |
|    | 65 | 1  | 0 | 0.741005  | 4.429858  | 1.809312  |
|    | 66 | 6  | 0 | -8.125707 | -1.165754 | -0.318588 |
|    | 67 | 1  | 0 | -8.316177 | -1.741770 | -1.227190 |
| 45 | 68 | 1  | 0 | -8.719792 | -0.250080 | -0.353549 |
|    | 69 | 1  | 0 | -8.420454 | -1.740872 | 0.562314  |
|    | 70 | 16 | 0 | 5.387487  | -3.415874 | 0.162368  |
|    | 71 | 16 | 0 | 2.814468  | 4.987739  | -0.564324 |
|    | 72 | 16 | 0 | -0.530433 | 5.988295  | 0.434244  |
| 50 | 73 | 16 | 0 | -6.392468 | -0.601952 | -0.219308 |

---

9d

Standard orientation:

| -----            |                  |                |                         |           |           |           |
|------------------|------------------|----------------|-------------------------|-----------|-----------|-----------|
| Center<br>Number | Atomic<br>Number | Atomic<br>Type | Coordinates (Angstroms) |           |           |           |
|                  |                  |                | X                       | Y         | Z         |           |
| -----            |                  |                |                         |           |           |           |
| 5                | 1                | 6              | 0                       | 4.372104  | 2.960220  | 0.208783  |
|                  | 2                | 6              | 0                       | 2.128604  | 4.716329  | -0.058558 |
|                  | 3                | 6              | 0                       | 4.517130  | 4.354003  | 0.137001  |
|                  | 4                | 6              | 0                       | 3.066203  | 2.435985  | 0.096425  |
| 10               | 5                | 6              | 0                       | 1.974524  | 3.333622  | 0.000107  |
|                  | 6                | 6              | 0                       | 3.424306  | 5.219217  | -0.010433 |
|                  | 7                | 1              | 0                       | 5.516639  | 4.767317  | 0.224922  |
|                  | 8                | 1              | 0                       | 3.597853  | 6.290161  | -0.056917 |
|                  | 9                | 1              | 0                       | 1.258508  | 5.358492  | -0.141538 |
| 15               | 10               | 6              | 0                       | 2.472980  | 1.087300  | 0.044423  |
|                  | 11               | 6              | 0                       | 0.761251  | 2.533796  | -0.042245 |
|                  | 12               | 7              | 0                       | 1.101483  | 1.210754  | -0.014017 |
|                  | 13               | 7              | 0                       | 3.155402  | -0.056894 | 0.003645  |
|                  | 14               | 6              | 0                       | 2.615021  | -1.274866 | -0.049561 |
| 20               | 15               | 6              | 0                       | 3.382163  | -2.518859 | -0.160115 |
|                  | 16               | 6              | 0                       | 2.437791  | -3.567508 | -0.098576 |
|                  | 17               | 6              | 0                       | 4.752559  | -2.811557 | -0.337807 |
|                  | 18               | 6              | 0                       | 5.107972  | -4.168827 | -0.392918 |
|                  | 19               | 1              | 0                       | 6.146273  | -4.448934 | -0.518802 |
| 25               | 20               | 6              | 0                       | 4.154662  | -5.193687 | -0.301397 |
|                  | 21               | 1              | 0                       | 4.491788  | -6.224961 | -0.352374 |
|                  | 22               | 6              | 0                       | 2.799885  | -4.910501 | -0.163396 |
|                  | 23               | 6              | 0                       | 1.124364  | -2.947018 | 0.005934  |
|                  | 24               | 7              | 0                       | 1.276091  | -1.587076 | 0.024257  |
| 30               | 25               | 7              | 0                       | -0.006034 | -3.647915 | 0.055474  |
|                  | 26               | 6              | 0                       | -1.219223 | -3.108189 | 0.081123  |
|                  | 27               | 6              | 0                       | -2.450643 | -3.893116 | 0.122859  |
|                  | 28               | 6              | 0                       | -5.057004 | -4.800504 | 0.183340  |
|                  | 29               | 6              | 0                       | -3.518433 | -2.969733 | 0.110577  |
| 35               | 30               | 6              | 0                       | -2.661570 | -5.268834 | 0.164326  |
|                  | 31               | 6              | 0                       | -3.983421 | -5.704626 | 0.195066  |
|                  | 32               | 6              | 0                       | -4.856853 | -3.411669 | 0.140041  |
|                  | 33               | 1              | 0                       | -1.825882 | -5.959501 | 0.172000  |
|                  | 34               | 1              | 0                       | -4.201529 | -6.768140 | 0.228633  |
| 40               | 35               | 1              | 0                       | -6.061907 | -5.202805 | 0.208402  |
|                  | 36               | 6              | 0                       | -2.908438 | -1.645214 | 0.061202  |
|                  | 37               | 7              | 0                       | -1.541187 | -1.777933 | 0.051786  |
|                  | 38               | 7              | 0                       | -3.602096 | -0.512332 | 0.020073  |
|                  | 39               | 6              | 0                       | -3.056401 | 0.699268  | -0.030124 |
| 45               | 40               | 7              | 0                       | -1.725611 | 1.018867  | -0.033008 |
|                  | 41               | 7              | 0                       | -0.455246 | 3.072118  | -0.092366 |
|                  | 42               | 6              | 0                       | -1.590612 | 2.385212  | -0.088088 |
|                  | 43               | 6              | 0                       | -3.839391 | 1.930248  | -0.091725 |
|                  | 44               | 6              | 0                       | -4.745096 | 4.534135  | -0.212558 |
| 50               | 45               | 6              | 0                       | -2.914582 | 2.996304  | -0.129224 |
|                  | 46               | 6              | 0                       | -5.215804 | 2.140490  | -0.113800 |
|                  | 47               | 6              | 0                       | -5.650201 | 3.461764  | -0.175203 |
|                  | 48               | 6              | 0                       | -3.355896 | 4.333644  | -0.190588 |
|                  | 49               | 1              | 0                       | -5.905799 | 1.304682  | -0.084195 |

|    |    |    |   |           |           |           |
|----|----|----|---|-----------|-----------|-----------|
|    | 50 | 1  | 0 | -6.713901 | 3.680715  | -0.194965 |
|    | 51 | 1  | 0 | -5.147002 | 5.538468  | -0.259193 |
|    | 52 | 30 | 0 | -0.221247 | -0.281288 | 0.031530  |
|    | 53 | 6  | 0 | -3.222893 | 7.140020  | -0.316895 |
| 5  | 54 | 1  | 0 | -3.855493 | 7.241128  | 0.568091  |
|    | 55 | 1  | 0 | -3.834141 | 7.157059  | -1.222281 |
|    | 56 | 1  | 0 | -2.527353 | 7.981361  | -0.348033 |
|    | 57 | 6  | 0 | -7.665423 | -3.281690 | 0.180043  |
|    | 58 | 1  | 0 | -7.709614 | -3.874959 | 1.096424  |
| 10 | 59 | 1  | 0 | -7.738478 | -3.931920 | -0.694882 |
|    | 60 | 1  | 0 | -8.508313 | -2.587366 | 0.171442  |
|    | 61 | 6  | 0 | 5.530319  | 1.104774  | 1.974866  |
|    | 62 | 1  | 0 | 4.760229  | 0.351644  | 1.812390  |
|    | 63 | 1  | 0 | 5.248436  | 1.797922  | 2.770009  |
| 15 | 64 | 1  | 0 | 6.466233  | 0.609436  | 2.241259  |
|    | 65 | 1  | 0 | 2.047151  | -5.688984 | -0.112464 |
|    | 66 | 6  | 0 | 7.484421  | -2.366219 | -0.828563 |
|    | 67 | 1  | 0 | 8.223891  | -1.577186 | -0.981121 |
|    | 68 | 1  | 0 | 7.436822  | -2.981476 | -1.730223 |
| 20 | 69 | 1  | 0 | 7.791038  | -2.973614 | 0.026485  |
|    | 70 | 16 | 0 | -2.165700 | 5.654416  | -0.234533 |
|    | 71 | 16 | 0 | 5.873181  | 2.016400  | 0.424525  |
|    | 72 | 16 | 0 | 5.915616  | -1.485273 | -0.522622 |
|    | 73 | 16 | 0 | -6.179591 | -2.222998 | 0.122259  |

-----

30

### p-8a

Standard orientation:

| ----- |                  |                  |                |                         |           |           |
|-------|------------------|------------------|----------------|-------------------------|-----------|-----------|
|       | Center<br>Number | Atomic<br>Number | Atomic<br>Type | Coordinates (Angstroms) |           |           |
|       |                  |                  |                | X                       | Y         | Z         |
| ----- |                  |                  |                |                         |           |           |
|       | 1                | 6                | 0              | -4.344849               | -3.528016 | -0.000019 |
| 40    | 2                | 6                | 0              | -5.488148               | -0.924152 | -0.000029 |
|       | 3                | 6                | 0              | -5.735806               | -3.350520 | -0.000013 |
|       | 4                | 6                | 0              | -3.547459               | -2.392067 | -0.000032 |
|       | 5                | 6                | 0              | -4.106404               | -1.095321 | -0.000035 |
|       | 6                | 6                | 0              | -6.301756               | -2.056500 | -0.000018 |
| 45    | 7                | 1                | 0              | -7.377850               | -1.932877 | -0.000013 |
|       | 8                | 1                | 0              | -5.921757               | 0.070520  | -0.000030 |
|       | 9                | 6                | 0              | -2.094402               | -2.215241 | -0.000041 |
|       | 10               | 6                | 0              | -2.990609               | -0.158605 | -0.000041 |
|       | 11               | 7                | 0              | -1.815361               | -0.870380 | -0.000046 |
| 50    | 12               | 7                | 0              | -1.230936               | -3.224517 | -0.000035 |
|       | 13               | 6                | 0              | 0.093132                | -3.079721 | -0.000020 |
|       | 14               | 6                | 0              | 1.030524                | -4.193530 | -0.000009 |
|       | 15               | 6                | 0              | 2.322253                | -3.635192 | 0.000014  |

|    |    |    |   |           |           |           |
|----|----|----|---|-----------|-----------|-----------|
|    | 16 | 6  | 0 | 0.860420  | -5.582381 | -0.000011 |
|    | 17 | 1  | 0 | -0.133186 | -6.018054 | -0.000030 |
|    | 18 | 6  | 0 | 1.992670  | -6.381424 | 0.000011  |
|    | 19 | 1  | 0 | 1.917911  | -7.463729 | 0.000014  |
| 5  | 20 | 6  | 0 | 3.290858  | -5.814617 | 0.000035  |
|    | 21 | 6  | 0 | 3.471136  | -4.428306 | 0.000036  |
|    | 22 | 6  | 0 | 2.146880  | -2.184427 | 0.000000  |
|    | 23 | 7  | 0 | 0.802469  | -1.902954 | -0.000014 |
|    | 24 | 7  | 0 | 3.157955  | -1.320855 | 0.000013  |
| 10 | 25 | 6  | 0 | 3.014052  | 0.002348  | 0.000016  |
|    | 26 | 6  | 0 | 4.127524  | 0.940345  | -0.000005 |
|    | 27 | 6  | 0 | 5.747813  | 3.202208  | -0.000038 |
|    | 28 | 6  | 0 | 3.568833  | 2.232020  | -0.000002 |
|    | 29 | 6  | 0 | 5.516580  | 0.771784  | -0.000026 |
| 15 | 30 | 6  | 0 | 6.315206  | 1.904286  | -0.000042 |
|    | 31 | 6  | 0 | 4.361661  | 3.381447  | -0.000021 |
|    | 32 | 1  | 0 | 5.953162  | -0.221447 | -0.000029 |
|    | 33 | 1  | 0 | 7.397578  | 1.830087  | -0.000059 |
|    | 34 | 6  | 0 | 2.118459  | 2.056161  | 0.000018  |
| 20 | 35 | 7  | 0 | 1.836642  | 0.713556  | 0.000028  |
|    | 36 | 7  | 0 | 1.254398  | 3.068628  | 0.000019  |
|    | 37 | 6  | 0 | -0.067712 | 2.925182  | 0.000009  |
|    | 38 | 7  | 0 | -0.781244 | 1.749110  | -0.000014 |
|    | 39 | 7  | 0 | -3.134894 | 1.164404  | -0.000033 |
| 25 | 40 | 6  | 0 | -2.124314 | 2.028326  | -0.000017 |
|    | 41 | 6  | 0 | -1.005328 | 4.040569  | 0.000004  |
|    | 42 | 6  | 0 | -3.262820 | 5.668390  | 0.000012  |
|    | 43 | 6  | 0 | -2.301838 | 3.480951  | -0.000009 |
|    | 44 | 6  | 0 | -0.836274 | 5.422602  | 0.000016  |
| 30 | 45 | 6  | 0 | -1.969246 | 6.235372  | 0.000020  |
|    | 46 | 6  | 0 | -3.438627 | 4.277529  | -0.000008 |
|    | 47 | 1  | 0 | 0.157830  | 5.857571  | 0.000027  |
|    | 48 | 1  | 0 | -1.846616 | 7.311612  | 0.000027  |
|    | 49 | 30 | 0 | 0.012601  | -0.078528 | -0.000010 |
| 35 | 50 | 8  | 0 | 6.655310  | 4.219709  | -0.000056 |
|    | 51 | 8  | 0 | -4.413041 | 6.401890  | 0.000010  |
|    | 52 | 8  | 0 | -6.470087 | -4.499822 | -0.000005 |
|    | 53 | 8  | 0 | 4.307825  | -6.722199 | 0.000048  |
|    | 54 | 6  | 0 | -4.320762 | 7.818189  | 0.000158  |
| 40 | 55 | 1  | 0 | -3.805349 | 8.191154  | 0.894244  |
|    | 56 | 1  | 0 | -5.348192 | 8.184690  | 0.000222  |
|    | 57 | 1  | 0 | -3.805400 | 8.191350  | -0.893879 |
|    | 58 | 6  | 0 | 6.167505  | 5.553383  | -0.000041 |
|    | 59 | 1  | 0 | 5.566056  | 5.762780  | -0.893566 |
| 45 | 60 | 1  | 0 | 7.048979  | 6.195886  | -0.000045 |
|    | 61 | 1  | 0 | 5.566075  | 5.762765  | 0.893501  |
|    | 62 | 6  | 0 | 5.642015  | -6.235175 | 0.000118  |
|    | 63 | 1  | 0 | 5.851662  | -5.633950 | 0.893674  |
|    | 64 | 1  | 0 | 5.851758  | -5.633953 | -0.893418 |
| 50 | 65 | 1  | 0 | 6.283807  | -7.117138 | 0.000152  |
|    | 66 | 6  | 0 | -7.886479 | -4.406637 | 0.000019  |
|    | 67 | 1  | 0 | -8.259022 | -3.890983 | 0.894091  |
|    | 68 | 1  | 0 | -8.253463 | -5.433875 | 0.000024  |
|    | 69 | 1  | 0 | -8.259056 | -3.890989 | -0.894044 |

|    |   |   |           |           |           |
|----|---|---|-----------|-----------|-----------|
| 70 | 1 | 0 | 4.449636  | -3.965454 | 0.000054  |
| 71 | 1 | 0 | -3.924825 | -4.527220 | -0.000019 |
| 72 | 1 | 0 | -4.437330 | 3.856312  | -0.000011 |
| 73 | 1 | 0 | 3.898169  | 4.359652  | -0.000018 |

**p-8b**

Standard orientation:

| Center Number | Atomic Number | Atomic Type | Coordinates (Angstroms) |           |           |
|---------------|---------------|-------------|-------------------------|-----------|-----------|
|               |               |             | X                       | Y         | Z         |
| 1             | 6             | 0           | 4.837505                | 2.785194  | 0.000077  |
| 2             | 6             | 0           | 2.835416                | 4.804942  | 0.000513  |
| 3             | 6             | 0           | 5.183361                | 4.144051  | 0.000451  |
| 4             | 6             | 0           | 3.487885                | 2.461307  | -0.000109 |
| 5             | 6             | 0           | 2.486831                | 3.457083  | 0.000075  |
| 6             | 6             | 0           | 4.187632                | 5.145656  | 0.000680  |
| 7             | 6             | 0           | 2.789612                | 1.175162  | -0.000431 |
| 8             | 6             | 0           | 1.205124                | 2.763349  | -0.000316 |
| 9             | 7             | 0           | 1.437831                | 1.407292  | -0.000381 |
| 10            | 7             | 0           | 3.412168                | 0.000006  | -0.000465 |
| 11            | 6             | 0           | 2.789618                | -1.175154 | -0.000483 |
| 12            | 6             | 0           | 3.487897                | -2.461298 | -0.000360 |
| 13            | 6             | 0           | 2.486845                | -3.457077 | -0.000305 |
| 14            | 6             | 0           | 4.837517                | -2.785175 | -0.000207 |
| 15            | 1             | 0           | 5.612206                | -2.027093 | -0.000201 |
| 16            | 6             | 0           | 5.183380                | -4.144033 | -0.000030 |
| 17            | 6             | 0           | 4.187657                | -5.145641 | -0.000028 |
| 18            | 6             | 0           | 2.835439                | -4.804936 | -0.000133 |
| 19            | 6             | 0           | 1.205136                | -2.763348 | -0.000426 |
| 20            | 7             | 0           | 1.437839                | -1.407289 | -0.000454 |
| 21            | 7             | 0           | 0.028975                | -3.382250 | -0.000358 |
| 22            | 6             | 0           | -1.148887               | -2.760819 | -0.000315 |
| 23            | 6             | 0           | -2.429555               | -3.453329 | -0.000080 |
| 24            | 6             | 0           | -5.125989               | -4.135265 | 0.000334  |
| 25            | 6             | 0           | -3.427184               | -2.460688 | -0.000022 |
| 26            | 6             | 0           | -2.779519               | -4.808020 | 0.000078  |
| 27            | 6             | 0           | -4.125432               | -5.137777 | 0.000274  |
| 28            | 6             | 0           | -4.786829               | -2.779224 | 0.000183  |
| 29            | 1             | 0           | -2.014099               | -5.576902 | 0.000037  |
| 30            | 1             | 0           | -4.451950               | -6.172358 | 0.000389  |
| 31            | 6             | 0           | -2.732267               | -1.175545 | -0.000203 |
| 32            | 7             | 0           | -1.378115               | -1.406329 | -0.000296 |
| 33            | 7             | 0           | -3.355174               | -0.000007 | -0.000129 |
| 34            | 6             | 0           | -2.732274               | 1.175534  | -0.000144 |
| 35            | 7             | 0           | -1.378122               | 1.406322  | -0.000205 |
| 36            | 7             | 0           | 0.028962                | 3.382248  | -0.000199 |
| 37            | 6             | 0           | -1.148899               | 2.760814  | -0.000182 |
| 38            | 6             | 0           | -3.427194               | 2.460674  | -0.000007 |
| 39            | 6             | 0           | -4.125453               | 5.137760  | 0.000250  |
| 40            | 6             | 0           | -2.429569               | 3.453318  | -0.000018 |
| 41            | 6             | 0           | -4.786842               | 2.779205  | 0.000135  |

|    |    |    |   |           |           |           |
|----|----|----|---|-----------|-----------|-----------|
|    | 42 | 6  | 0 | -5.126005 | 4.135246  | 0.000261  |
|    | 43 | 6  | 0 | -2.779537 | 4.808009  | 0.000119  |
|    | 44 | 1  | 0 | -4.451969 | 6.172342  | 0.000350  |
|    | 45 | 30 | 0 | 0.027891  | -0.000001 | -0.001078 |
| 5  | 46 | 1  | 0 | -2.014120 | 5.576892  | 0.000109  |
|    | 47 | 1  | 0 | 5.612195  | 2.027112  | -0.000054 |
|    | 48 | 1  | 0 | 2.069831  | -5.573830 | -0.000128 |
|    | 49 | 1  | 0 | 2.069809  | 5.573836  | 0.000657  |
|    | 50 | 1  | 0 | -5.528709 | -1.990828 | 0.000188  |
| 10 | 51 | 1  | 0 | -5.528718 | 1.990807  | 0.000147  |
|    | 52 | 8  | 0 | -6.404836 | -4.608491 | 0.000460  |
|    | 53 | 8  | 0 | -6.404855 | 4.608474  | 0.000407  |
|    | 54 | 6  | 0 | -7.467598 | -3.667216 | 0.001054  |
|    | 55 | 1  | 0 | -7.443156 | -3.030845 | -0.892534 |
| 15 | 56 | 1  | 0 | -8.387896 | -4.252745 | 0.001531  |
|    | 57 | 1  | 0 | -7.442185 | -3.030882 | 0.894636  |
|    | 58 | 6  | 0 | -7.467625 | 3.667205  | 0.000435  |
|    | 59 | 1  | 0 | -8.387918 | 4.252740  | 0.000577  |
|    | 60 | 1  | 0 | -7.442790 | 3.030925  | -0.893204 |
| 20 | 61 | 1  | 0 | -7.442613 | 3.030781  | 0.893966  |
|    | 62 | 1  | 0 | 4.468052  | 6.191865  | 0.000996  |
|    | 63 | 8  | 0 | 6.522069  | 4.404948  | 0.000639  |
|    | 64 | 6  | 0 | 6.955156  | 5.756752  | 0.000477  |
|    | 65 | 1  | 0 | 8.045360  | 5.721129  | 0.000259  |
| 25 | 66 | 1  | 0 | 6.612028  | 6.292609  | -0.893500 |
|    | 67 | 1  | 0 | 6.612418  | 6.292711  | 0.894547  |
|    | 68 | 1  | 0 | 4.468078  | -6.191850 | -0.000001 |
|    | 69 | 8  | 0 | 6.522089  | -4.404922 | -0.000066 |
|    | 70 | 6  | 0 | 6.955183  | -5.756723 | 0.002024  |
| 30 | 71 | 1  | 0 | 6.611335  | -6.291523 | 0.896354  |
|    | 72 | 1  | 0 | 6.613174  | -6.293742 | -0.891693 |
|    | 73 | 1  | 0 | 8.045386  | -5.721091 | 0.003063  |

35

40

### p-8c

Standard orientation:

| -----     |        |        |                         |           |           |          |
|-----------|--------|--------|-------------------------|-----------|-----------|----------|
| Center    | Atomic | Atomic | Coordinates (Angstroms) |           |           |          |
| 45 Number | Number | Type   | X                       | Y         | Z         |          |
| -----     |        |        |                         |           |           |          |
|           | 1      | 6      | 0                       | -2.807716 | -5.085214 | 0.000570 |
|           | 2      | 6      | 0                       | -4.813939 | -3.055000 | 0.000461 |
|           | 3      | 6      | 0                       | -4.154212 | -5.414201 | 0.000880 |
| 50        | 4      | 6      | 0                       | -2.457880 | -3.730924 | 0.000154 |
|           | 5      | 6      | 0                       | -3.454812 | -2.738813 | 0.000101 |
|           | 6      | 6      | 0                       | -5.154351 | -4.411626 | 0.000833 |
|           | 7      | 1      | 0                       | -4.481201 | -6.448634 | 0.001174 |

|    |    |    |   |           |           |           |
|----|----|----|---|-----------|-----------|-----------|
|    | 8  | 6  | 0 | -1.175872 | -3.037778 | -0.000234 |
|    | 9  | 6  | 0 | -2.759102 | -1.451692 | -0.000370 |
|    | 10 | 7  | 0 | -1.404667 | -1.683444 | -0.000326 |
|    | 11 | 7  | 0 | 0.000655  | -3.660036 | -0.000108 |
| 5  | 12 | 6  | 0 | 1.176959  | -3.037359 | -0.000086 |
|    | 13 | 6  | 0 | 2.459214  | -3.730052 | -0.000017 |
|    | 14 | 6  | 0 | 3.455794  | -2.737587 | -0.000023 |
|    | 15 | 6  | 0 | 2.809532  | -5.084216 | 0.000035  |
|    | 16 | 1  | 0 | 2.044736  | -5.853699 | 0.000039  |
| 10 | 17 | 6  | 0 | 4.156149  | -5.412721 | 0.000082  |
|    | 18 | 1  | 0 | 4.483505  | -6.447036 | 0.000132  |
|    | 19 | 6  | 0 | 5.155928  | -4.409788 | 0.000066  |
|    | 20 | 6  | 0 | 4.815034  | -3.053285 | 0.000005  |
|    | 21 | 6  | 0 | 2.759625  | -1.450713 | -0.000023 |
| 15 | 22 | 7  | 0 | 1.405274  | -1.682945 | -0.000055 |
|    | 23 | 7  | 0 | 3.382645  | -0.278305 | 0.000026  |
|    | 24 | 6  | 0 | 2.761302  | 0.901715  | -0.000049 |
|    | 25 | 6  | 0 | 3.453533  | 2.182026  | 0.000266  |
|    | 26 | 6  | 0 | 4.134631  | 4.879106  | 0.000808  |
| 20 | 27 | 6  | 0 | 2.460462  | 3.179670  | 0.000200  |
|    | 28 | 6  | 0 | 4.808228  | 2.532878  | 0.000610  |
|    | 29 | 6  | 0 | 5.137568  | 3.878643  | 0.000860  |
|    | 30 | 6  | 0 | 2.778834  | 4.539467  | 0.000490  |
|    | 31 | 1  | 0 | 5.577591  | 1.767919  | 0.000661  |
| 25 | 32 | 1  | 0 | 6.171991  | 4.205724  | 0.001098  |
|    | 33 | 6  | 0 | 1.175701  | 2.484586  | -0.000169 |
|    | 34 | 7  | 0 | 1.407574  | 1.129978  | -0.000256 |
|    | 35 | 7  | 0 | -0.000543 | 3.105815  | -0.000212 |
|    | 36 | 6  | 0 | -1.176574 | 2.484174  | -0.000334 |
| 30 | 37 | 7  | 0 | -1.407961 | 1.129491  | -0.000467 |
|    | 38 | 7  | 0 | -3.382533 | -0.279501 | -0.000372 |
|    | 39 | 6  | 0 | -2.761614 | 0.900739  | -0.000407 |
|    | 40 | 6  | 0 | -2.461582 | 3.178804  | -0.000178 |
|    | 41 | 6  | 0 | -5.138938 | 3.876823  | 0.000101  |
| 35 | 42 | 6  | 0 | -3.454298 | 2.180806  | -0.000213 |
|    | 43 | 6  | 0 | -2.780443 | 4.538485  | 0.000006  |
|    | 44 | 6  | 0 | -4.136364 | 4.877646  | 0.000133  |
|    | 45 | 6  | 0 | -4.809114 | 2.531176  | -0.000056 |
|    | 46 | 1  | 0 | -6.173481 | 4.203525  | 0.000212  |
| 40 | 47 | 30 | 0 | 0.000041  | -0.274894 | -0.001961 |
|    | 48 | 1  | 0 | -5.578206 | 1.765942  | -0.000061 |
|    | 49 | 1  | 0 | -2.042639 | -5.854420 | 0.000631  |
|    | 50 | 1  | 0 | 5.555525  | -2.263541 | -0.000018 |
|    | 51 | 1  | 0 | -5.554713 | -2.265522 | 0.000435  |
| 45 | 52 | 8  | 0 | 6.434493  | -4.880569 | 0.000086  |
|    | 53 | 8  | 0 | -6.432744 | -4.882880 | 0.001184  |
|    | 54 | 6  | 0 | -7.495522 | -3.940551 | 0.000868  |
|    | 55 | 1  | 0 | -7.469970 | -3.304709 | -0.892896 |
|    | 56 | 1  | 0 | -8.415904 | -4.525856 | 0.000965  |
| 50 | 57 | 1  | 0 | -7.470088 | -3.304238 | 0.894303  |
|    | 58 | 6  | 0 | 7.496904  | -3.937833 | 0.000576  |
|    | 59 | 1  | 0 | 8.417519  | -4.522774 | 0.000951  |
|    | 60 | 1  | 0 | 7.471555  | -3.301731 | -0.893015 |
|    | 61 | 1  | 0 | 7.470773  | -3.301791 | 0.894181  |

|    |    |   |   |           |          |           |
|----|----|---|---|-----------|----------|-----------|
|    | 62 | 1 | 0 | 1.990186  | 5.281119 | 0.000476  |
|    | 63 | 1 | 0 | -1.992059 | 5.280418 | 0.000073  |
|    | 64 | 8 | 0 | 4.607559  | 6.157770 | 0.001126  |
|    | 65 | 8 | 0 | -4.609769 | 6.156140 | 0.000304  |
| 5  | 66 | 6 | 0 | 3.666326  | 7.220605 | 0.000330  |
|    | 67 | 1 | 0 | 3.029677  | 7.196028 | 0.893741  |
|    | 68 | 1 | 0 | 4.251807  | 8.140958 | 0.000115  |
|    | 69 | 1 | 0 | 3.030261  | 7.195206 | -0.893466 |
|    | 70 | 6 | 0 | -3.668970 | 7.219358 | 0.000253  |
| 10 | 71 | 1 | 0 | -4.254821 | 8.139477 | 0.000269  |
|    | 72 | 1 | 0 | -3.032560 | 7.194641 | 0.893826  |
|    | 73 | 1 | 0 | -3.032644 | 7.194622 | -0.893380 |

15 **p-8d**

Standard orientation:

|    | Center Number | Atomic Number | Atomic Type | Coordinates (Angstroms) |           |           |
|----|---------------|---------------|-------------|-------------------------|-----------|-----------|
|    |               |               |             | X                       | Y         | Z         |
| 20 | 1             | 6             | 0           | 5.289793                | -2.207137 | 0.000269  |
|    | 2             | 6             | 0           | 3.565883                | -4.467907 | 0.000404  |
|    | 3             | 6             | 0           | 5.809395                | -3.510204 | 0.000823  |
|    | 4             | 6             | 0           | 3.910211                | -2.060063 | -0.000247 |
| 25 | 5             | 6             | 0           | 3.046246                | -3.176472 | -0.000191 |
|    | 6             | 6             | 0           | 4.951233                | -4.631640 | 0.000890  |
|    | 7             | 6             | 0           | 3.051522                | -0.873411 | -0.000782 |
|    | 8             | 6             | 0           | 1.685096                | -2.653405 | -0.000733 |
|    | 9             | 7             | 0           | 1.740708                | -1.279530 | -0.001018 |
| 30 | 10            | 7             | 0           | 3.517601                | 0.370119  | -0.000693 |
|    | 11            | 6             | 0           | 2.748484                | 1.458707  | -0.000729 |
|    | 12            | 6             | 0           | 3.270399                | 2.818098  | -0.000182 |
|    | 13            | 6             | 0           | 2.157391                | 3.678849  | -0.000029 |
|    | 14            | 6             | 0           | 4.568349                | 3.340784  | 0.000319  |
| 35 | 15            | 1             | 0           | 5.431071                | 2.681967  | 0.000242  |
|    | 16            | 6             | 0           | 4.720470                | 4.718536  | 0.000988  |
|    | 17            | 1             | 0           | 5.704891                | 5.175758  | 0.001421  |
|    | 18            | 6             | 0           | 3.596927                | 5.581234  | 0.001198  |
|    | 19            | 6             | 0           | 2.296167                | 5.067660  | 0.000676  |
| 40 | 20            | 6             | 0           | 0.971692                | 2.823697  | -0.000650 |
|    | 21            | 7             | 0           | 1.376836                | 1.509618  | -0.000999 |
|    | 22            | 7             | 0           | -0.271686               | 3.289786  | -0.000541 |
|    | 23            | 6             | 0           | -1.362002               | 2.523457  | -0.000656 |
|    | 24            | 6             | 0           | -2.720653               | 3.044670  | -0.000219 |
| 45 | 25            | 6             | 0           | -5.484943               | 3.370289  | 0.000524  |
|    | 26            | 6             | 0           | -3.581668               | 1.930816  | -0.000273 |
|    | 27            | 6             | 0           | -3.244993               | 4.342380  | 0.000256  |
|    | 28            | 6             | 0           | -4.622346               | 4.494328  | 0.000604  |
|    | 29            | 6             | 0           | -4.971443               | 2.070502  | 0.000115  |
| 50 | 30            | 1             | 0           | -2.586704               | 5.205563  | 0.000316  |
|    | 31            | 1             | 0           | -5.080063               | 5.478560  | 0.000938  |
|    | 32            | 6             | 0           | -2.726660               | 0.747298  | -0.000672 |
|    | 33            | 7             | 0           | -1.414631               | 1.150322  | -0.000860 |



|    |    |    |   |           |           |           |
|----|----|----|---|-----------|-----------|-----------|
|    | 34 | 7  | 0 | -3.192189 | -0.500573 | -0.000559 |
|    | 35 | 6  | 0 | -2.424233 | -1.584831 | -0.000627 |
|    | 36 | 7  | 0 | -1.050196 | -1.640137 | -0.001006 |
|    | 37 | 7  | 0 | 0.598946  | -3.419081 | -0.000590 |
| 5  | 38 | 6  | 0 | -0.649411 | -2.952781 | -0.000642 |
|    | 39 | 6  | 0 | -2.947475 | -2.949372 | 0.000018  |
|    | 40 | 6  | 0 | -3.295802 | -5.694049 | 0.001351  |
|    | 41 | 6  | 0 | -1.830377 | -3.804974 | 0.000019  |
|    | 42 | 6  | 0 | -4.254431 | -3.440482 | 0.000691  |
| 10 | 43 | 6  | 0 | -4.417439 | -4.828998 | 0.001353  |
|    | 44 | 6  | 0 | -2.003227 | -5.193418 | 0.000705  |
|    | 45 | 1  | 0 | -3.485463 | -6.762781 | 0.001891  |
|    | 46 | 30 | 0 | 0.162018  | -0.063836 | -0.003643 |
|    | 47 | 1  | 0 | -1.145023 | -5.858141 | 0.000740  |
| 15 | 48 | 1  | 0 | 5.960649  | -1.355042 | 0.000262  |
|    | 49 | 1  | 0 | 1.417164  | 5.700371  | 0.000761  |
|    | 50 | 1  | 0 | 2.906142  | -5.330110 | 0.000479  |
|    | 51 | 8  | 0 | 3.899953  | 6.909748  | 0.001828  |
|    | 52 | 6  | 0 | 2.830212  | 7.843392  | 0.003015  |
| 20 | 53 | 1  | 0 | 3.295635  | 8.830557  | 0.004133  |
|    | 54 | 1  | 0 | 2.203059  | 7.737222  | -0.891663 |
|    | 55 | 1  | 0 | 2.203219  | 7.735080  | 0.897541  |
|    | 56 | 1  | 0 | -5.604323 | 1.191597  | 0.000116  |
|    | 57 | 1  | 0 | -5.092021 | -2.753884 | 0.000695  |
| 25 | 58 | 8  | 0 | -6.814126 | 3.674345  | 0.000950  |
|    | 59 | 8  | 0 | -5.624679 | -5.462274 | 0.002037  |
|    | 60 | 6  | 0 | -7.747322 | 2.605131  | 0.000251  |
|    | 61 | 1  | 0 | -7.640442 | 1.977385  | 0.894626  |
|    | 62 | 1  | 0 | -8.734762 | 3.070129  | 0.000194  |
| 30 | 63 | 1  | 0 | -7.639947 | 1.978151  | -0.894596 |
|    | 64 | 6  | 0 | -6.800131 | -4.666609 | 0.002386  |
|    | 65 | 1  | 0 | -7.635967 | -5.368450 | 0.003163  |
|    | 66 | 1  | 0 | -6.856043 | -4.032399 | 0.896802  |
|    | 67 | 1  | 0 | -6.857090 | -4.033151 | -0.892499 |
| 35 | 68 | 1  | 0 | 5.363976  | -5.633679 | 0.001339  |
|    | 69 | 8  | 0 | 7.170192  | -3.595214 | 0.001301  |
|    | 70 | 6  | 0 | 7.775496  | -4.878860 | 0.001739  |
|    | 71 | 1  | 0 | 8.852065  | -4.699501 | 0.001949  |
|    | 72 | 1  | 0 | 7.504057  | -5.453755 | 0.896857  |
| 40 | 73 | 1  | 0 | 7.504470  | -5.454171 | -0.893235 |

45

### Dimer of 8a

50 Standard orientation:

| Center<br>Number | Atomic<br>Number | Atomic<br>Type | Coordinates (Angstroms) |   |   |
|------------------|------------------|----------------|-------------------------|---|---|
|                  |                  |                | X                       | Y | Z |

---

|    |    |    |   |           |           |           |
|----|----|----|---|-----------|-----------|-----------|
|    | 1  | 6  | 0 | 8.734807  | -1.191666 | -0.677405 |
|    | 2  | 6  | 0 | 7.477014  | -3.709205 | -0.164813 |
|    | 3  | 6  | 0 | 9.443544  | -2.397548 | -0.777169 |
| 5  | 4  | 6  | 0 | 7.374351  | -1.258686 | -0.320432 |
|    | 5  | 6  | 0 | 6.774091  | -2.508606 | -0.073210 |
|    | 6  | 6  | 0 | 8.818993  | -3.630632 | -0.522865 |
|    | 7  | 1  | 0 | 10.491043 | -2.391678 | -1.052804 |
|    | 8  | 1  | 0 | 9.410155  | -4.537815 | -0.610890 |
| 10 | 9  | 1  | 0 | 6.984001  | -4.652849 | 0.039496  |
|    | 10 | 6  | 0 | 6.334616  | -0.253431 | -0.099293 |
|    | 11 | 6  | 0 | 5.381382  | -2.236476 | 0.281363  |
|    | 12 | 7  | 0 | 5.163565  | -0.888274 | 0.234776  |
|    | 13 | 7  | 0 | 6.537916  | 1.059248  | -0.153595 |
| 15 | 14 | 6  | 0 | 5.618786  | 1.967011  | 0.164251  |
|    | 15 | 6  | 0 | 5.929057  | 3.392074  | 0.260046  |
|    | 16 | 6  | 0 | 4.753647  | 4.027668  | 0.705801  |
|    | 17 | 6  | 0 | 7.111195  | 4.089172  | 0.012049  |
|    | 18 | 1  | 0 | 7.999124  | 3.565232  | -0.323017 |
| 20 | 19 | 6  | 0 | 7.088946  | 5.464668  | 0.216273  |
|    | 20 | 1  | 0 | 7.982911  | 6.054164  | 0.033286  |
|    | 21 | 6  | 0 | 5.930406  | 6.125705  | 0.660496  |
|    | 22 | 1  | 0 | 5.966322  | 7.198594  | 0.804945  |
|    | 23 | 6  | 0 | 4.746357  | 5.420412  | 0.916786  |
| 25 | 24 | 6  | 0 | 3.751064  | 2.975288  | 0.863488  |
|    | 25 | 7  | 0 | 4.309284  | 1.769775  | 0.504938  |
|    | 26 | 7  | 0 | 2.516543  | 3.178025  | 1.311039  |
|    | 27 | 6  | 0 | 1.621382  | 2.213032  | 1.495553  |
|    | 28 | 6  | 0 | 0.250575  | 2.486048  | 1.920315  |
| 30 | 29 | 6  | 0 | -2.464076 | 2.428927  | 2.417062  |
|    | 30 | 6  | 0 | -0.428114 | 1.246977  | 1.897845  |
|    | 31 | 6  | 0 | -0.389480 | 3.683066  | 2.236307  |
|    | 32 | 6  | 0 | -1.752718 | 3.636409  | 2.515219  |
|    | 33 | 6  | 0 | -1.817539 | 1.241788  | 2.081770  |
| 35 | 34 | 1  | 0 | 0.168539  | 4.612856  | 2.240013  |
|    | 35 | 1  | 0 | -2.290727 | 4.545770  | 2.763943  |
|    | 36 | 1  | 0 | -3.540897 | 2.412218  | 2.549389  |
|    | 37 | 6  | 0 | 0.586977  | 0.236682  | 1.583700  |
|    | 38 | 7  | 0 | 1.772255  | 0.867359  | 1.314542  |
| 40 | 39 | 7  | 0 | 0.381164  | -1.077517 | 1.656408  |
|    | 40 | 6  | 0 | 1.331575  | -1.990435 | 1.456462  |
|    | 41 | 7  | 0 | 2.619618  | -1.784150 | 1.051247  |
|    | 42 | 7  | 0 | 4.530445  | -3.200424 | 0.617663  |
|    | 43 | 6  | 0 | 3.269311  | -2.992088 | 0.984338  |
| 45 | 44 | 6  | 0 | 1.117738  | -3.421963 | 1.669813  |
|    | 45 | 6  | 0 | 1.339309  | -6.169034 | 1.924236  |
|    | 46 | 6  | 0 | 2.345699  | -4.051425 | 1.384356  |
|    | 47 | 6  | 0 | -0.008380 | -4.139017 | 2.073589  |
|    | 48 | 6  | 0 | 0.123690  | -5.518433 | 2.192973  |
| 50 | 49 | 6  | 0 | 2.469597  | -5.447918 | 1.515269  |
|    | 50 | 1  | 0 | -0.948223 | -3.638324 | 2.273103  |
|    | 51 | 1  | 0 | -0.729020 | -6.117610 | 2.498910  |
|    | 52 | 1  | 0 | 1.390304  | -7.245278 | 2.035569  |
|    | 53 | 30 | 0 | 3.341810  | -0.009446 | 0.369427  |

|    |     |   |   |            |           |           |
|----|-----|---|---|------------|-----------|-----------|
|    | 54  | 6 | 0 | 3.821096   | -7.408889 | 1.394128  |
|    | 55  | 1 | 0 | 3.630097   | -7.722881 | 2.428133  |
|    | 56  | 1 | 0 | 4.857558   | -7.631013 | 1.137019  |
|    | 57  | 1 | 0 | 3.155404   | -7.965235 | 0.721771  |
| 5  | 58  | 6 | 0 | -2.667366  | -0.899731 | 2.799539  |
|    | 59  | 1 | 0 | -1.669409  | -1.309396 | 2.965138  |
|    | 60  | 1 | 0 | -3.333006  | -1.668550 | 2.405133  |
|    | 61  | 1 | 0 | -3.084487  | -0.484974 | 3.722783  |
|    | 62  | 6 | 0 | 3.577202   | 7.389651  | 1.581389  |
| 10 | 63  | 1 | 0 | 4.301862   | 7.682270  | 2.351742  |
|    | 64  | 1 | 0 | 2.569767   | 7.622412  | 1.928564  |
|    | 65  | 1 | 0 | 3.782300   | 7.954927  | 0.663160  |
|    | 66  | 6 | 0 | 10.643626  | 0.115683  | -1.255486 |
|    | 67  | 1 | 0 | 11.287564  | -0.291498 | -0.465741 |
| 15 | 68  | 1 | 0 | 10.856207  | 1.178144  | -1.380360 |
|    | 69  | 1 | 0 | 10.855060  | -0.407791 | -2.196656 |
|    | 70  | 6 | 0 | -2.469197  | 5.447912  | -1.514642 |
|    | 71  | 6 | 0 | 0.008696   | 4.138901  | -2.073086 |
|    | 72  | 6 | 0 | -1.338865  | 6.168992  | -1.923550 |
| 20 | 73  | 6 | 0 | -2.345391  | 4.051396  | -1.383881 |
|    | 74  | 6 | 0 | -1.117474  | 3.421876  | -1.669396 |
|    | 75  | 6 | 0 | -0.123286  | 5.518337  | -2.192340 |
|    | 76  | 1 | 0 | -1.389795  | 7.245248  | -2.034800 |
|    | 77  | 1 | 0 | 0.729465   | 6.117488  | -2.498214 |
| 25 | 78  | 1 | 0 | 0.948517   | 3.638180  | -2.272635 |
|    | 79  | 6 | 0 | -3.269080  | 2.992085  | -0.983984 |
|    | 80  | 6 | 0 | -1.331416  | 1.990342  | -1.456177 |
|    | 81  | 7 | 0 | -2.619481  | 1.784104  | -1.051008 |
|    | 82  | 7 | 0 | -4.530207  | 3.200484  | -0.617322 |
| 30 | 83  | 6 | 0 | -5.381232  | 2.236572  | -0.281158 |
|    | 84  | 6 | 0 | -6.773991  | 2.508766  | 0.073163  |
|    | 85  | 6 | 0 | -7.374390  | 1.258867  | 0.320133  |
|    | 86  | 6 | 0 | -7.476852  | 3.709406  | 0.164711  |
|    | 87  | 1 | 0 | -6.983730  | 4.653033  | -0.039410 |
| 35 | 88  | 6 | 0 | -8.818916  | 3.630892  | 0.522455  |
|    | 89  | 1 | 0 | -9.410036  | 4.538106  | 0.610436  |
|    | 90  | 6 | 0 | -9.443610  | 2.397826  | 0.776499  |
|    | 91  | 1 | 0 | -10.491170 | 2.392001  | 1.051903  |
|    | 92  | 6 | 0 | -8.734936  | 1.191904  | 0.676774  |
| 40 | 93  | 6 | 0 | -6.334674  | 0.253564  | 0.099123  |
|    | 94  | 7 | 0 | -5.163495  | 0.888351  | -0.234590 |
|    | 95  | 7 | 0 | -6.538104  | -1.059107 | 0.153227  |
|    | 96  | 6 | 0 | -5.618991  | -1.966903 | -0.164573 |
|    | 97  | 6 | 0 | -5.929326  | -3.391948 | -0.260443 |
| 45 | 98  | 6 | 0 | -5.930770  | -6.125570 | -0.660944 |
|    | 99  | 6 | 0 | -4.753898  | -4.027594 | -0.706071 |
|    | 100 | 6 | 0 | -7.111529  | -4.088987 | -0.012598 |
|    | 101 | 6 | 0 | -7.089328  | -5.464481 | -0.216847 |
|    | 102 | 6 | 0 | -4.746654  | -5.420333 | -0.917086 |
| 50 | 103 | 1 | 0 | -7.999470  | -3.565007 | 0.322372  |
|    | 104 | 1 | 0 | -7.983346  | -6.053934 | -0.033976 |
|    | 105 | 1 | 0 | -5.966722  | -7.198456 | -0.805408 |
|    | 106 | 6 | 0 | -3.751244  | -2.975260 | -0.863627 |
|    | 107 | 7 | 0 | -4.309449  | -1.769724 | -0.505131 |

|    |     |    |   |            |           |           |
|----|-----|----|---|------------|-----------|-----------|
|    | 108 | 7  | 0 | -2.516684  | -3.178052 | -1.311036 |
|    | 109 | 6  | 0 | -1.621455  | -2.213102 | -1.495467 |
|    | 110 | 7  | 0 | -1.772266  | -0.867424 | -1.314466 |
|    | 111 | 7  | 0 | -0.381059  | 1.077381  | -1.656194 |
| 5  | 112 | 6  | 0 | -0.586939  | -0.236811 | -1.583580 |
|    | 113 | 6  | 0 | -0.250651  | -2.486197 | -1.920168 |
|    | 114 | 6  | 0 | 2.464005   | -2.429273 | -2.416837 |
|    | 115 | 6  | 0 | 0.428107   | -1.247159 | -1.897725 |
|    | 116 | 6  | 0 | 0.389333   | -3.683271 | -2.236081 |
| 10 | 117 | 6  | 0 | 1.752584   | -3.636720 | -2.514934 |
|    | 118 | 6  | 0 | 1.817544   | -1.242056 | -2.081650 |
|    | 119 | 1  | 0 | -0.168747  | -4.613024 | -2.239766 |
|    | 120 | 1  | 0 | 2.290546   | -4.546130 | -2.763583 |
|    | 121 | 1  | 0 | 3.540830   | -2.412633 | -2.549150 |
| 15 | 122 | 30 | 0 | -3.341792  | 0.009363  | -0.369278 |
|    | 123 | 6  | 0 | 2.667401   | 0.899408  | -2.799555 |
|    | 124 | 1  | 0 | 3.083450   | 0.484434  | -3.723194 |
|    | 125 | 1  | 0 | 3.333932   | 1.667704  | -2.405623 |
|    | 126 | 1  | 0 | 1.669586   | 1.309755  | -2.964321 |
| 20 | 127 | 6  | 0 | -3.577442  | -7.389653 | -1.581335 |
|    | 128 | 1  | 0 | -3.782633  | -7.954789 | -0.663041 |
|    | 129 | 1  | 0 | -2.569974  | -7.622463 | -1.928377 |
|    | 130 | 1  | 0 | -4.302025  | -7.682386 | -2.351717 |
|    | 131 | 6  | 0 | -10.644010 | -0.115369 | 1.254226  |
| 25 | 132 | 1  | 0 | -10.855679 | 0.408058  | 2.195370  |
|    | 133 | 1  | 0 | -10.856695 | -1.177824 | 1.378974  |
|    | 134 | 1  | 0 | -11.287702 | 0.291903  | 0.464326  |
|    | 135 | 6  | 0 | -3.820603  | 7.408942  | -1.393492 |
|    | 136 | 1  | 0 | -3.155018  | 7.965257  | -0.721002 |
| 30 | 137 | 1  | 0 | -4.857106  | 7.631086  | -1.136564 |
|    | 138 | 1  | 0 | -3.629411  | 7.722955  | -2.427454 |
|    | 139 | 8  | 0 | 2.607059   | -0.129691 | -1.788939 |
|    | 140 | 8  | 0 | 9.270503   | 0.034022  | -0.906296 |
|    | 141 | 8  | 0 | 3.675211   | -6.006319 | 1.236831  |
| 35 | 142 | 8  | 0 | -2.606910  | 0.129320  | 1.788919  |
|    | 143 | 8  | 0 | 3.593250   | 5.989534  | 1.351018  |
|    | 144 | 8  | 0 | -3.593516  | -5.989510 | -1.351176 |
|    | 145 | 8  | 0 | -9.270777  | -0.033770 | 0.905423  |
|    | 146 | 8  | 0 | -3.674779  | 6.006360  | -1.236199 |

40 -----

### Dimer of 8b

Standard orientation:

| 45 | Center Number | Atomic Number | Atomic Type | Coordinates (Angstroms) |           |           |
|----|---------------|---------------|-------------|-------------------------|-----------|-----------|
|    |               |               |             | X                       | Y         | Z         |
|    | 1             | 6             | 0           | -1.892193               | -1.473712 | -1.947395 |
|    | 2             | 6             | 0           | -0.384418               | -3.851576 | -2.241885 |
| 50 | 3             | 6             | 0           | -2.516315               | -2.691196 | -2.212099 |
|    | 4             | 6             | 0           | -0.492959               | -1.417788 | -1.878739 |
|    | 5             | 6             | 0           | 0.229865                | -2.628121 | -1.981328 |
|    | 6             | 6             | 0           | -1.769433               | -3.868374 | -2.376461 |

|    |    |    |   |           |           |           |
|----|----|----|---|-----------|-----------|-----------|
|    | 7  | 1  | 0 | -3.600025 | -2.714285 | -2.256058 |
|    | 8  | 1  | 0 | -2.288215 | -4.801169 | -2.573823 |
|    | 9  | 1  | 0 | 0.209990  | -4.755686 | -2.313651 |
|    | 10 | 6  | 0 | 0.503894  | -0.369164 | -1.619804 |
| 5  | 11 | 6  | 0 | 1.620920  | -2.303663 | -1.683524 |
|    | 12 | 7  | 0 | 1.732091  | -0.962309 | -1.461349 |
|    | 13 | 7  | 0 | 0.240582  | 0.935434  | -1.637163 |
|    | 14 | 6  | 0 | 1.151499  | 1.885865  | -1.423045 |
|    | 15 | 6  | 0 | 0.917875  | 3.323702  | -1.602136 |
| 10 | 16 | 6  | 0 | 2.136522  | 3.959171  | -1.287600 |
|    | 17 | 6  | 0 | -0.181429 | 4.109777  | -2.002710 |
|    | 18 | 6  | 0 | -0.004322 | 5.498341  | -2.084835 |
|    | 19 | 1  | 0 | -0.827903 | 6.132303  | -2.386950 |
|    | 20 | 6  | 0 | 1.225807  | 6.097948  | -1.774925 |
| 15 | 21 | 1  | 0 | 1.313513  | 7.177421  | -1.857854 |
|    | 22 | 6  | 0 | 2.317671  | 5.339035  | -1.369941 |
|    | 23 | 6  | 0 | 3.068969  | 2.904442  | -0.909681 |
|    | 24 | 7  | 0 | 2.450286  | 1.693996  | -1.018106 |
|    | 25 | 7  | 0 | 4.322744  | 3.162198  | -0.541957 |
| 20 | 26 | 6  | 0 | 5.231384  | 2.225989  | -0.289103 |
|    | 27 | 6  | 0 | 6.623476  | 2.537320  | 0.023779  |
|    | 28 | 6  | 0 | 9.332975  | 2.503986  | 0.562093  |
|    | 29 | 6  | 0 | 7.289271  | 1.301023  | 0.143643  |
|    | 30 | 6  | 0 | 7.279276  | 3.760086  | 0.165097  |
| 25 | 31 | 6  | 0 | 8.641983  | 3.721180  | 0.439667  |
|    | 32 | 6  | 0 | 8.672341  | 1.276787  | 0.411870  |
|    | 33 | 1  | 0 | 6.739422  | 4.693852  | 0.056218  |
|    | 34 | 1  | 0 | 9.197013  | 4.646960  | 0.561166  |
|    | 35 | 1  | 0 | 10.394591 | 2.526766  | 0.775038  |
| 30 | 36 | 6  | 0 | 6.283929  | 0.265758  | -0.105268 |
|    | 37 | 7  | 0 | 5.071737  | 0.868919  | -0.331978 |
|    | 38 | 7  | 0 | 6.551587  | -1.037392 | -0.156890 |
|    | 39 | 6  | 0 | 5.679445  | -1.975773 | -0.514882 |
|    | 40 | 7  | 0 | 4.355260  | -1.790373 | -0.826364 |
| 35 | 41 | 7  | 0 | 2.576646  | -3.226407 | -1.627653 |
|    | 42 | 6  | 0 | 3.824770  | -2.976958 | -1.245198 |
|    | 43 | 6  | 0 | 6.030983  | -3.390020 | -0.714847 |
|    | 44 | 6  | 0 | 5.986498  | -6.082953 | -1.497780 |
|    | 45 | 6  | 0 | 4.858545  | -4.007411 | -1.211108 |
| 40 | 46 | 6  | 0 | 7.202583  | -4.162377 | -0.580964 |
|    | 47 | 6  | 0 | 7.154193  | -5.502466 | -0.989879 |
|    | 48 | 6  | 0 | 4.811166  | -5.341408 | -1.603872 |
|    | 49 | 1  | 0 | 8.063938  | -6.085198 | -0.888798 |
|    | 50 | 1  | 0 | 6.000845  | -7.126844 | -1.797344 |
| 45 | 51 | 30 | 0 | 3.287782  | -0.082472 | -0.493222 |
|    | 52 | 8  | 0 | 9.278752  | 0.067289  | 0.511532  |
|    | 53 | 8  | 0 | -2.709415 | -0.386860 | -1.646060 |
|    | 54 | 6  | 0 | 10.686973 | 0.027840  | 0.694686  |
|    | 55 | 1  | 0 | 10.956994 | -1.028450 | 0.689927  |
| 50 | 56 | 1  | 0 | 10.984195 | 0.475162  | 1.651709  |
|    | 57 | 1  | 0 | 11.212696 | 0.538700  | -0.121072 |
|    | 58 | 6  | 0 | -2.841908 | 0.610806  | -2.686757 |
|    | 59 | 1  | 0 | -3.126015 | 0.117941  | -3.621614 |
|    | 60 | 1  | 0 | -1.909383 | 1.166715  | -2.787395 |

|    |     |   |   |            |           |           |
|----|-----|---|---|------------|-----------|-----------|
|    | 61  | 1 | 0 | -3.647893  | 1.269119  | -2.360600 |
|    | 62  | 1 | 0 | 3.891008   | -5.768484 | -1.986704 |
|    | 63  | 1 | 0 | 3.277735   | 5.784609  | -1.134810 |
|    | 64  | 8 | 0 | 8.406354   | -3.720097 | -0.115128 |
| 5  | 65  | 8 | 0 | -1.355276  | 3.485273  | -2.283747 |
|    | 66  | 6 | 0 | -2.477014  | 4.292083  | -2.627592 |
|    | 67  | 1 | 0 | -2.734006  | 4.982304  | -1.817026 |
|    | 68  | 1 | 0 | -3.306470  | 3.602376  | -2.780570 |
|    | 69  | 1 | 0 | -2.298904  | 4.854879  | -3.552111 |
| 10 | 70  | 6 | 0 | 8.433962   | -3.145066 | 1.198449  |
|    | 71  | 1 | 0 | 9.487938   | -3.119385 | 1.485323  |
|    | 72  | 1 | 0 | 7.890878   | -3.782724 | 1.907508  |
|    | 73  | 1 | 0 | 8.023806   | -2.134692 | 1.192509  |
|    | 74  | 6 | 0 | -7.202165  | -4.162597 | 0.580865  |
| 15 | 75  | 6 | 0 | -4.810779  | -5.341298 | 1.604236  |
|    | 76  | 6 | 0 | -7.153684  | -5.502662 | 0.989857  |
|    | 77  | 6 | 0 | -6.030678  | -3.390094 | 0.714914  |
|    | 78  | 6 | 0 | -4.858250  | -4.007329 | 1.211394  |
|    | 79  | 6 | 0 | -5.986007  | -6.082985 | 1.497986  |
| 20 | 80  | 1 | 0 | -8.063339  | -6.085508 | 0.888641  |
|    | 81  | 1 | 0 | -6.000285  | -7.126864 | 1.797598  |
|    | 82  | 1 | 0 | -3.890631  | -5.768245 | 1.987238  |
|    | 83  | 6 | 0 | -5.679263  | -1.975818 | 0.514932  |
|    | 84  | 6 | 0 | -3.824594  | -2.976761 | 1.245587  |
| 25 | 85  | 7 | 0 | -4.355151  | -1.790252 | 0.826631  |
|    | 86  | 7 | 0 | -6.551447  | -1.037540 | 0.156773  |
|    | 87  | 6 | 0 | -6.283896  | 0.265625  | 0.105070  |
|    | 88  | 6 | 0 | -7.289323  | 1.300790  | -0.143911 |
|    | 89  | 6 | 0 | -6.623646  | 2.537152  | -0.024070 |
| 30 | 90  | 6 | 0 | -8.672381  | 1.276419  | -0.412187 |
|    | 91  | 6 | 0 | -9.333128  | 2.503549  | -0.562458 |
|    | 92  | 1 | 0 | -10.394747 | 2.526226  | -0.775404 |
|    | 93  | 6 | 0 | -8.642252  | 3.720812  | -0.440054 |
|    | 94  | 1 | 0 | -9.197367  | 4.646536  | -0.561586 |
| 35 | 95  | 6 | 0 | -7.279555  | 3.759853  | -0.165452 |
|    | 96  | 6 | 0 | -5.231534  | 2.225957  | 0.288858  |
|    | 97  | 7 | 0 | -5.071752  | 0.868909  | 0.331755  |
|    | 98  | 7 | 0 | -4.322996  | 3.162260  | 0.541738  |
|    | 99  | 6 | 0 | -3.069215  | 2.904623  | 0.909521  |
| 40 | 100 | 6 | 0 | -2.136897  | 3.959451  | 1.287483  |
|    | 101 | 6 | 0 | 0.003717   | 5.498867  | 2.084824  |
|    | 102 | 6 | 0 | -0.918185  | 3.324118  | 1.602040  |
|    | 103 | 6 | 0 | -2.318227  | 5.339288  | 1.369851  |
|    | 104 | 6 | 0 | -1.226477  | 6.098330  | 1.774900  |
| 45 | 105 | 6 | 0 | 0.181008   | 4.110328  | 2.002654  |
|    | 106 | 1 | 0 | -3.278343  | 5.784740  | 1.134700  |
|    | 107 | 1 | 0 | -1.314325  | 7.177789  | 1.857868  |
|    | 108 | 1 | 0 | 0.827210   | 6.132920  | 2.386986  |
|    | 109 | 6 | 0 | -1.151646  | 1.886251  | 1.422935  |
| 50 | 110 | 7 | 0 | -2.450404  | 1.694242  | 1.017956  |
|    | 111 | 7 | 0 | -0.240651  | 0.935912  | 1.637128  |
|    | 112 | 6 | 0 | -0.503898  | -0.368706 | 1.619963  |
|    | 113 | 7 | 0 | -1.732061  | -0.961935 | 1.461594  |
|    | 114 | 7 | 0 | -2.576487  | -3.226064 | 1.628198  |

|    |     |    |   |            |           |           |
|----|-----|----|---|------------|-----------|-----------|
|    | 115 | 6  | 0 | -1.620826  | -2.303253 | 1.683992  |
|    | 116 | 6  | 0 | 0.493002   | -1.417240 | 1.879079  |
|    | 117 | 6  | 0 | 1.769594   | -3.867658 | 2.377302  |
|    | 118 | 6  | 0 | -0.229764  | -2.627586 | 1.981893  |
| 5  | 119 | 6  | 0 | 1.892235   | -1.473083 | 1.947735  |
|    | 120 | 6  | 0 | 2.516420   | -2.690479 | 2.212699  |
|    | 121 | 6  | 0 | 0.384579   | -3.850959 | 2.242697  |
|    | 122 | 1  | 0 | 3.600132   | -2.713508 | 2.256665  |
|    | 123 | 1  | 0 | 2.288418   | -4.800388 | 2.574860  |
| 10 | 124 | 30 | 0 | -3.287736  | -0.082355 | 0.493206  |
|    | 125 | 8  | 0 | 1.354950   | 3.485990  | 2.283654  |
|    | 126 | 8  | 0 | -8.405896  | -3.720508 | 0.114764  |
|    | 127 | 6  | 0 | 2.476600   | 4.292951  | 2.627417  |
|    | 128 | 1  | 0 | 3.306180   | 3.603362  | 2.780262  |
| 15 | 129 | 1  | 0 | 2.298511   | 4.855671  | 3.551987  |
|    | 130 | 1  | 0 | 2.733388   | 4.983258  | 1.816860  |
|    | 131 | 6  | 0 | -8.433336  | -3.145351 | -1.198758 |
|    | 132 | 1  | 0 | -7.889523  | -3.782553 | -1.907668 |
|    | 133 | 1  | 0 | -8.023819  | -2.134719 | -1.192533 |
| 20 | 134 | 1  | 0 | -9.487207  | -3.120351 | -1.486088 |
|    | 135 | 1  | 0 | -0.209782  | -4.755086 | 2.314627  |
|    | 136 | 1  | 0 | -6.739791  | 4.693672  | -0.056584 |
|    | 137 | 8  | 0 | 2.709372   | -0.386253 | 1.646108  |
|    | 138 | 8  | 0 | -9.278679  | 0.066862  | -0.511812 |
| 25 | 139 | 6  | 0 | -10.686850 | 0.027284  | -0.695318 |
|    | 140 | 1  | 0 | -11.212820 | 0.538048  | 0.120343  |
|    | 141 | 1  | 0 | -10.956763 | -1.029034 | -0.690682 |
|    | 142 | 1  | 0 | -10.983884 | 0.474629  | -1.652387 |
|    | 143 | 6  | 0 | 2.841995   | 0.611595  | 2.686605  |
| 30 | 144 | 1  | 0 | 3.647876   | 1.269907  | 2.360192  |
|    | 145 | 1  | 0 | 3.126296   | 0.118916  | 3.621502  |
|    | 146 | 1  | 0 | 1.909453   | 1.167466  | 2.787314  |

### 35 Dimer of 8c

Standard orientation:

| Center Number | Atomic Number | Atomic Type | Coordinates (Angstroms) |           |           |          |
|---------------|---------------|-------------|-------------------------|-----------|-----------|----------|
|               |               |             | X                       | Y         | Z         |          |
| 40            | 1             | 6           | 0                       | 0.941618  | -3.650042 | 2.402298 |
|               | 2             | 6           | 0                       | 2.164150  | -1.103503 | 2.204704 |
|               | 3             | 6           | 0                       | 2.292109  | -3.484063 | 2.697068 |
|               | 4             | 6           | 0                       | 0.208753  | -2.518430 | 2.049598 |
| 45            | 5             | 6           | 0                       | 0.781875  | -1.227967 | 2.009484 |
|               | 6             | 6           | 0                       | 2.902458  | -2.224974 | 2.575384 |
|               | 7             | 1           | 0                       | 2.899299  | -4.340111 | 2.973576 |
|               | 8             | 1           | 0                       | 3.973030  | -2.117098 | 2.715120 |
|               | 9             | 6           | 0                       | -1.172031 | -2.367853 | 1.597242 |
| 50            | 10            | 6           | 0                       | -0.311066 | -0.311688 | 1.666269 |
|               | 11            | 7           | 0                       | -1.434972 | -1.043039 | 1.390940 |
|               | 12            | 7           | 0                       | -1.982816 | -3.403170 | 1.408729 |
|               | 13            | 6           | 0                       | -3.223461 | -3.294233 | 0.942009 |

|    |    |    |   |            |           |           |
|----|----|----|---|------------|-----------|-----------|
|    | 14 | 6  | 0 | -4.108371  | -4.444965 | 0.778049  |
|    | 15 | 6  | 0 | -5.337391  | -3.938132 | 0.311026  |
|    | 16 | 6  | 0 | -3.901055  | -5.804993 | 1.014473  |
|    | 17 | 1  | 0 | -2.948557  | -6.163224 | 1.388728  |
| 5  | 18 | 6  | 0 | -4.965815  | -6.662483 | 0.758428  |
|    | 19 | 1  | 0 | -4.853368  | -7.730015 | 0.925138  |
|    | 20 | 6  | 0 | -6.201034  | -6.184376 | 0.287322  |
|    | 21 | 1  | 0 | -6.998160  | -6.894290 | 0.103589  |
|    | 22 | 6  | 0 | -6.409903  | -4.816922 | 0.059984  |
| 10 | 23 | 6  | 0 | -5.176323  | -2.487746 | 0.222000  |
|    | 24 | 7  | 0 | -3.889535  | -2.157975 | 0.575563  |
|    | 25 | 7  | 0 | -6.158595  | -1.644710 | -0.081348 |
|    | 26 | 6  | 0 | -6.052960  | -0.321706 | -0.008542 |
|    | 27 | 6  | 0 | -7.199112  | 0.563247  | -0.198714 |
| 15 | 28 | 6  | 0 | -8.974409  | 2.671272  | -0.348810 |
|    | 29 | 6  | 0 | -6.735181  | 1.872769  | 0.035018  |
|    | 30 | 6  | 0 | -8.528124  | 0.278108  | -0.508375 |
|    | 31 | 6  | 0 | -9.405159  | 1.354737  | -0.584115 |
|    | 32 | 6  | 0 | -7.638074  | 2.952068  | -0.031149 |
| 20 | 33 | 1  | 0 | -8.846633  | -0.744819 | -0.673724 |
|    | 34 | 1  | 0 | -10.450948 | 1.186909  | -0.825375 |
|    | 35 | 1  | 0 | -9.696966  | 3.475457  | -0.414702 |
|    | 36 | 6  | 0 | -5.308642  | 1.752841  | 0.348690  |
|    | 37 | 7  | 0 | -4.953075  | 0.428379  | 0.301542  |
| 25 | 38 | 7  | 0 | -4.520205  | 2.782710  | 0.652093  |
|    | 39 | 6  | 0 | -3.239913  | 2.685542  | 0.997765  |
|    | 40 | 7  | 0 | -2.494869  | 1.535467  | 1.084993  |
|    | 41 | 7  | 0 | -0.216501  | 1.015203  | 1.727031  |
|    | 42 | 6  | 0 | -1.235115  | 1.846394  | 1.506486  |
| 30 | 43 | 6  | 0 | -2.404847  | 3.829796  | 1.387422  |
|    | 44 | 6  | 0 | -0.318744  | 5.434849  | 2.349739  |
|    | 45 | 6  | 0 | -1.140560  | 3.288915  | 1.720145  |
|    | 46 | 6  | 0 | -2.613317  | 5.216112  | 1.524505  |
|    | 47 | 6  | 0 | -1.558124  | 5.993887  | 2.017998  |
| 35 | 48 | 6  | 0 | -0.089583  | 4.069457  | 2.193869  |
|    | 49 | 1  | 0 | -1.733498  | 7.059159  | 2.127645  |
|    | 50 | 1  | 0 | 0.472841   | 6.079934  | 2.719455  |
|    | 51 | 30 | 0 | -3.063995  | -0.303193 | 0.419809  |
|    | 52 | 8  | 0 | -7.159924  | 4.197910  | 0.217672  |
| 40 | 53 | 8  | 0 | -7.572013  | -4.283780 | -0.392696 |
|    | 54 | 6  | 0 | -8.078818  | 5.279920  | 0.257285  |
|    | 55 | 1  | 0 | -8.545140  | 5.453410  | -0.721043 |
|    | 56 | 1  | 0 | -7.493932  | 6.155965  | 0.539004  |
|    | 57 | 1  | 0 | -8.863441  | 5.113783  | 1.005466  |
| 45 | 58 | 6  | 0 | -8.663825  | -5.156544 | -0.641871 |
|    | 59 | 1  | 0 | -8.425236  | -5.891712 | -1.420949 |
|    | 60 | 1  | 0 | -9.480165  | -4.520553 | -0.986070 |
|    | 61 | 1  | 0 | -8.975633  | -5.685055 | 0.267680  |
|    | 62 | 1  | 0 | 0.868568   | 3.623111  | 2.432571  |
| 50 | 63 | 1  | 0 | 0.467397   | -4.624905 | 2.422753  |
|    | 64 | 8  | 0 | -3.779067  | 5.874881  | 1.251809  |
|    | 65 | 6  | 0 | -4.240416  | 5.833472  | -0.104575 |
|    | 66 | 1  | 0 | -5.020964  | 6.594644  | -0.174602 |
|    | 67 | 1  | 0 | -4.656028  | 4.854695  | -0.347228 |



|    |     |   |   |           |           |           |
|----|-----|---|---|-----------|-----------|-----------|
|    | 68  | 1 | 0 | -3.427248 | 6.095364  | -0.793849 |
|    | 69  | 8 | 0 | 2.861856  | 0.059571  | 1.881352  |
|    | 70  | 6 | 0 | 2.845116  | 1.115524  | 2.865083  |
|    | 71  | 1 | 0 | 1.817425  | 1.441526  | 3.034310  |
| 5  | 72  | 1 | 0 | 3.436738  | 1.928511  | 2.442416  |
|    | 73  | 1 | 0 | 3.306930  | 0.762806  | 3.792858  |
|    | 74  | 6 | 0 | 7.058447  | 4.512658  | -0.055640 |
|    | 75  | 6 | 0 | 4.606124  | 5.647394  | -0.993952 |
|    | 76  | 6 | 0 | 6.937847  | 5.877391  | -0.295042 |
| 10 | 77  | 6 | 0 | 5.930357  | 3.725240  | -0.285697 |
|    | 78  | 6 | 0 | 4.713612  | 4.264514  | -0.747724 |
|    | 79  | 6 | 0 | 5.736168  | 6.442248  | -0.755989 |
|    | 80  | 1 | 0 | 7.787158  | 6.533372  | -0.126730 |
|    | 81  | 1 | 0 | 5.695939  | 7.510896  | -0.928104 |
| 15 | 82  | 6 | 0 | 5.718463  | 2.285412  | -0.152619 |
|    | 83  | 6 | 0 | 3.787163  | 3.141354  | -0.876789 |
|    | 84  | 7 | 0 | 4.426922  | 1.987080  | -0.486439 |
|    | 85  | 7 | 0 | 6.692431  | 1.443890  | 0.186038  |
|    | 86  | 6 | 0 | 6.560533  | 0.120661  | 0.166606  |
| 20 | 87  | 6 | 0 | 7.676269  | -0.790088 | 0.420272  |
|    | 88  | 6 | 0 | 7.175510  | -2.092802 | 0.229646  |
|    | 89  | 6 | 0 | 9.005012  | -0.542297 | 0.762773  |
|    | 90  | 1 | 0 | 9.363121  | 0.472029  | 0.897008  |
|    | 91  | 6 | 0 | 9.835678  | -1.647230 | 0.919838  |
| 25 | 92  | 1 | 0 | 10.878400 | -1.506094 | 1.189608  |
|    | 93  | 6 | 0 | 9.362529  | -2.957583 | 0.736804  |
|    | 94  | 1 | 0 | 10.050703 | -3.783264 | 0.870787  |
|    | 95  | 6 | 0 | 8.027364  | -3.203205 | 0.385840  |
|    | 96  | 6 | 0 | 5.765777  | -1.943254 | -0.131679 |
| 30 | 97  | 7 | 0 | 5.445489  | -0.607511 | -0.138200 |
|    | 98  | 7 | 0 | 4.959760  | -2.954735 | -0.433254 |
|    | 99  | 6 | 0 | 3.688863  | -2.819273 | -0.801509 |
|    | 100 | 6 | 0 | 2.856318  | -3.967241 | -1.142525 |
|    | 101 | 6 | 0 | 0.852253  | -5.730376 | -1.817922 |
| 35 | 102 | 6 | 0 | 1.578497  | -3.461150 | -1.455576 |
|    | 103 | 6 | 0 | 3.164136  | -5.325934 | -1.166665 |
|    | 104 | 6 | 0 | 2.139279  | -6.199740 | -1.510167 |
|    | 105 | 6 | 0 | 0.549495  | -4.361177 | -1.798031 |
|    | 106 | 1 | 0 | 4.163888  | -5.665195 | -0.920614 |
| 40 | 107 | 1 | 0 | 2.323131  | -7.269901 | -1.541891 |
|    | 108 | 1 | 0 | 0.085266  | -6.450753 | -2.072720 |
|    | 109 | 6 | 0 | 1.673492  | -2.003266 | -1.314133 |
|    | 110 | 7 | 0 | 2.950186  | -1.677732 | -0.921444 |
|    | 111 | 7 | 0 | 0.674950  | -1.149308 | -1.542172 |
| 45 | 112 | 6 | 0 | 0.804760  | 0.177416  | -1.512279 |
|    | 113 | 7 | 0 | 1.948204  | 0.892353  | -1.265388 |
|    | 114 | 7 | 0 | 2.542872  | 3.246245  | -1.328125 |
|    | 115 | 6 | 0 | 1.713105  | 2.219597  | -1.483402 |
|    | 116 | 6 | 0 | -0.272100 | 1.117264  | -1.852183 |
| 50 | 117 | 6 | 0 | -1.733203 | 3.413194  | -2.537219 |
|    | 118 | 6 | 0 | 0.329580  | 2.394767  | -1.910977 |
|    | 119 | 6 | 0 | -1.658850 | 1.030476  | -2.036049 |
|    | 120 | 6 | 0 | -2.371994 | 2.169642  | -2.403081 |
|    | 121 | 6 | 0 | -0.375561 | 3.544618  | -2.260447 |

|    |     |    |   |           |           |           |
|----|-----|----|---|-----------|-----------|-----------|
|    | 122 | 1  | 0 | -3.445360 | 2.083395  | -2.537017 |
|    | 123 | 1  | 0 | -2.321167 | 4.281784  | -2.817414 |
|    | 124 | 30 | 0 | 3.570969  | 0.153902  | -0.300099 |
|    | 125 | 8  | 0 | -0.680147 | -3.859492 | -2.087442 |
| 5  | 126 | 8  | 0 | 7.500834  | -4.438305 | 0.189841  |
|    | 127 | 6  | 0 | -1.730724 | -4.779803 | -2.358898 |
|    | 128 | 1  | 0 | -1.516967 | -5.383979 | -3.249289 |
|    | 129 | 1  | 0 | -2.619335 | -4.175801 | -2.540993 |
|    | 130 | 1  | 0 | -1.918825 | -5.437398 | -1.503149 |
| 10 | 131 | 6  | 0 | 8.354213  | -5.564853 | 0.323364  |
|    | 132 | 1  | 0 | 9.184891  | -5.530678 | -0.392689 |
|    | 133 | 1  | 0 | 7.732585  | -6.435576 | 0.111313  |
|    | 134 | 1  | 0 | 8.759257  | -5.649281 | 1.339820  |
|    | 135 | 1  | 0 | 0.131587  | 4.502585  | -2.292433 |
| 15 | 136 | 1  | 0 | 7.983034  | 4.067759  | 0.294051  |
|    | 137 | 8  | 0 | -2.390179 | -0.115562 | -1.730809 |
|    | 138 | 6  | 0 | -2.387057 | -1.157277 | -2.734865 |
|    | 139 | 1  | 0 | -3.141380 | -1.876536 | -2.414124 |
|    | 140 | 1  | 0 | -1.404076 | -1.627397 | -2.776509 |
| 20 | 141 | 1  | 0 | -2.675196 | -0.728570 | -3.699759 |
|    | 142 | 8  | 0 | 3.416194  | 6.120365  | -1.441831 |
|    | 143 | 6  | 0 | 3.295379  | 7.511836  | -1.695262 |
|    | 144 | 1  | 0 | 3.456071  | 8.104923  | -0.786017 |
|    | 145 | 1  | 0 | 2.273819  | 7.662571  | -2.046139 |
| 25 | 146 | 1  | 0 | 3.997120  | 7.845065  | -2.470230 |

### 30 Dimer of 8d

Standard orientation:

|    | Center Number | Atomic Number | Atomic Type | Coordinates (Angstroms) |           |           |
|----|---------------|---------------|-------------|-------------------------|-----------|-----------|
|    |               |               |             | X                       | Y         | Z         |
| 35 | 1             | 6             | 0           | -8.431081               | 1.099775  | 0.697742  |
|    | 2             | 6             | 0           | -7.033878               | 3.586958  | 0.604967  |
|    | 3             | 6             | 0           | -9.049830               | 2.307032  | 1.045871  |
|    | 4             | 6             | 0           | -7.073078               | 1.136701  | 0.325456  |
| 40 | 5             | 6             | 0           | -6.409822               | 2.384982  | 0.282129  |
|    | 6             | 6             | 0           | -8.367345               | 3.529859  | 1.004724  |
|    | 7             | 1             | 0           | -10.091967              | 2.264363  | 1.345607  |
|    | 8             | 1             | 0           | -8.894156               | 4.439745  | 1.277650  |
|    | 9             | 1             | 0           | -6.483557               | 4.519761  | 0.548593  |
| 45 | 10            | 6             | 0           | -6.062284               | 0.132678  | -0.039106 |
|    | 11            | 6             | 0           | -5.034720               | 2.115514  | -0.128500 |
|    | 12            | 7             | 0           | -4.868171               | 0.768148  | -0.276753 |
|    | 13            | 7             | 0           | -6.303636               | -1.170931 | -0.141778 |
|    | 14            | 6             | 0           | -5.413210               | -2.078492 | -0.543272 |
| 50 | 15            | 6             | 0           | -5.716714               | -3.500166 | -0.730402 |
|    | 16            | 6             | 0           | -4.537925               | -4.094317 | -1.223834 |
|    | 17            | 6             | 0           | -6.856641               | -4.297856 | -0.507690 |
|    | 18            | 6             | 0           | -6.770911               | -5.664602 | -0.807831 |

|    |    |    |   |            |           |           |
|----|----|----|---|------------|-----------|-----------|
|    | 19 | 1  | 0 | -7.627040  | -6.309425 | -0.651631 |
|    | 20 | 6  | 0 | -5.585665  | -6.225438 | -1.312250 |
|    | 21 | 1  | 0 | -5.567255  | -7.289222 | -1.531262 |
|    | 22 | 6  | 0 | -4.449614  | -5.452658 | -1.526444 |
| 5  | 23 | 6  | 0 | -3.541761  | -3.029864 | -1.303713 |
|    | 24 | 7  | 0 | -4.102292  | -1.855393 | -0.884427 |
|    | 25 | 7  | 0 | -2.294778  | -3.244306 | -1.713441 |
|    | 26 | 6  | 0 | -1.367596  | -2.294930 | -1.786639 |
|    | 27 | 6  | 0 | 0.026345   | -2.568364 | -2.128491 |
| 10 | 28 | 6  | 0 | 2.772122   | -2.516149 | -2.433123 |
|    | 29 | 6  | 0 | 0.709157   | -1.334845 | -2.028704 |
|    | 30 | 6  | 0 | 0.683914   | -3.761342 | -2.424628 |
|    | 31 | 6  | 0 | 2.064609   | -3.718483 | -2.596968 |
|    | 32 | 6  | 0 | 2.107233   | -1.329914 | -2.131857 |
| 15 | 33 | 1  | 0 | 0.127419   | -4.689520 | -2.493678 |
|    | 34 | 1  | 0 | 2.614037   | -4.627185 | -2.821850 |
|    | 35 | 1  | 0 | 3.854607   | -2.498616 | -2.503162 |
|    | 36 | 6  | 0 | -0.313194  | -0.329103 | -1.726211 |
|    | 37 | 7  | 0 | -1.515333  | -0.959128 | -1.541337 |
| 20 | 38 | 7  | 0 | -0.096929  | 0.984551  | -1.732498 |
|    | 39 | 6  | 0 | -1.030454  | 1.891799  | -1.452666 |
|    | 40 | 7  | 0 | -2.297444  | 1.676845  | -0.991158 |
|    | 41 | 7  | 0 | -4.154020  | 3.086287  | -0.353373 |
|    | 42 | 6  | 0 | -2.914890  | 2.885366  | -0.794934 |
| 25 | 43 | 6  | 0 | -0.811109  | 3.330400  | -1.604611 |
|    | 44 | 6  | 0 | -1.010699  | 6.089278  | -1.698276 |
|    | 45 | 6  | 0 | -1.998203  | 3.957646  | -1.178220 |
|    | 46 | 6  | 0 | 0.281598   | 4.054496  | -2.079885 |
|    | 47 | 6  | 0 | 0.159566   | 5.439436  | -2.122876 |
| 30 | 48 | 6  | 0 | -2.103775  | 5.360655  | -1.211400 |
|    | 49 | 1  | 0 | 1.188694   | 3.553993  | -2.397004 |
|    | 50 | 1  | 0 | 0.986333   | 6.043473  | -2.484596 |
|    | 51 | 1  | 0 | -1.052134  | 7.170608  | -1.743425 |
|    | 52 | 30 | 0 | -3.071354  | -0.138142 | -0.513384 |
| 35 | 53 | 8  | 0 | 2.879440   | -0.212186 | -1.817277 |
|    | 54 | 8  | 0 | -3.256326  | 5.920763  | -0.754804 |
|    | 55 | 8  | 0 | -9.190078  | -0.033278 | 0.789357  |
|    | 56 | 6  | 0 | -3.404158  | 7.330091  | -0.851331 |
|    | 57 | 1  | 0 | -3.330209  | 7.673313  | -1.890563 |
| 40 | 58 | 1  | 0 | -2.658762  | 7.859904  | -0.244648 |
|    | 59 | 1  | 0 | -4.401570  | 7.551539  | -0.469523 |
|    | 60 | 6  | 0 | 2.958767   | 0.810541  | -2.834516 |
|    | 61 | 1  | 0 | 1.968870   | 1.239293  | -2.999686 |
|    | 62 | 1  | 0 | 3.363679   | 0.379385  | -3.755381 |
| 45 | 63 | 1  | 0 | 3.643795   | 1.566553  | -2.449131 |
|    | 64 | 6  | 0 | -9.448446  | -0.719726 | -0.443320 |
|    | 65 | 1  | 0 | -9.841666  | -0.023070 | -1.194599 |
|    | 66 | 1  | 0 | -10.215386 | -1.462465 | -0.213477 |
|    | 67 | 1  | 0 | -8.550868  | -1.220618 | -0.808513 |
| 50 | 68 | 1  | 0 | -3.526624  | -5.875163 | -1.906769 |
|    | 69 | 8  | 0 | -7.965311  | -3.696956 | -0.005723 |
|    | 70 | 6  | 0 | -9.088556  | -4.506047 | 0.310875  |
|    | 71 | 1  | 0 | -9.826270  | -3.832047 | 0.747230  |
|    | 72 | 1  | 0 | -8.831657  | -5.282416 | 1.042016  |

|    |     |    |   |           |           |           |
|----|-----|----|---|-----------|-----------|-----------|
|    | 73  | 1  | 0 | -9.513124 | -4.980089 | -0.583204 |
|    | 74  | 6  | 0 | -1.604433 | -1.567147 | 1.849018  |
|    | 75  | 6  | 0 | -0.007379 | -3.898526 | 2.022840  |
|    | 76  | 6  | 0 | -2.178904 | -2.814294 | 2.085401  |
| 5  | 77  | 6  | 0 | -0.210210 | -1.458292 | 1.748733  |
|    | 78  | 6  | 0 | 0.556162  | -2.645049 | 1.791763  |
|    | 79  | 6  | 0 | -1.387069 | -3.969269 | 2.189446  |
|    | 80  | 1  | 0 | -3.259742 | -2.877627 | 2.155031  |
|    | 81  | 1  | 0 | -1.868884 | -4.925908 | 2.365742  |
| 10 | 82  | 1  | 0 | 0.624331  | -4.779700 | 2.047305  |
|    | 83  | 6  | 0 | 0.743441  | -0.367505 | 1.503355  |
|    | 84  | 6  | 0 | 1.928369  | -2.264000 | 1.477180  |
|    | 85  | 7  | 0 | 1.987311  | -0.911143 | 1.301773  |
|    | 86  | 7  | 0 | 0.436662  | 0.927499  | 1.565964  |
| 15 | 87  | 6  | 0 | 1.308499  | 1.915386  | 1.361303  |
|    | 88  | 6  | 0 | 1.030979  | 3.338434  | 1.590570  |
|    | 89  | 6  | 0 | 2.220328  | 4.025034  | 1.271043  |
|    | 90  | 6  | 0 | -0.087664 | 4.074238  | 2.032830  |
|    | 91  | 6  | 0 | 0.044320  | 5.465197  | 2.151412  |
| 20 | 92  | 1  | 0 | -0.794852 | 6.060631  | 2.487768  |
|    | 93  | 6  | 0 | 1.247787  | 6.115508  | 1.837235  |
|    | 94  | 1  | 0 | 1.300388  | 7.194797  | 1.948821  |
|    | 95  | 6  | 0 | 2.355753  | 5.407130  | 1.388460  |
|    | 96  | 6  | 0 | 3.179941  | 3.016416  | 0.838382  |
| 25 | 97  | 7  | 0 | 2.603862  | 1.782036  | 0.918398  |
|    | 98  | 7  | 0 | 4.415746  | 3.328631  | 0.451290  |
|    | 99  | 6  | 0 | 5.348122  | 2.432387  | 0.146536  |
|    | 100 | 6  | 0 | 6.717726  | 2.799950  | -0.210074 |
|    | 101 | 6  | 0 | 9.399163  | 2.867104  | -0.877937 |
| 30 | 102 | 6  | 0 | 7.421101  | 1.591154  | -0.380004 |
|    | 103 | 6  | 0 | 7.324726  | 4.046322  | -0.360855 |
|    | 104 | 6  | 0 | 8.673881  | 4.057391  | -0.699615 |
|    | 105 | 6  | 0 | 8.788287  | 1.615245  | -0.717498 |
|    | 106 | 1  | 0 | 6.759177  | 4.959696  | -0.215677 |
| 35 | 107 | 1  | 0 | 9.190820  | 5.003578  | -0.831901 |
|    | 108 | 1  | 0 | 10.447499 | 2.930733  | -1.142553 |
|    | 109 | 6  | 0 | 6.465760  | 0.516747  | -0.110193 |
|    | 110 | 7  | 0 | 5.238365  | 1.070256  | 0.165141  |
|    | 111 | 7  | 0 | 6.782990  | -0.773030 | -0.071128 |
| 40 | 112 | 6  | 0 | 5.939715  | -1.734286 | 0.296141  |
|    | 113 | 7  | 0 | 4.615782  | -1.628402 | 0.613739  |
|    | 114 | 7  | 0 | 2.907343  | -3.157520 | 1.372768  |
|    | 115 | 6  | 0 | 4.144587  | -2.863451 | 0.990852  |
|    | 116 | 6  | 0 | 6.364566  | -3.124057 | 0.460322  |
| 45 | 117 | 6  | 0 | 6.575869  | -5.831322 | 0.966763  |
|    | 118 | 6  | 0 | 5.233364  | -3.836329 | 0.902954  |
|    | 119 | 6  | 0 | 7.604618  | -3.730828 | 0.265336  |
|    | 120 | 6  | 0 | 7.688203  | -5.095212 | 0.523837  |
|    | 121 | 6  | 0 | 5.331698  | -5.216117 | 1.166723  |
| 50 | 122 | 1  | 0 | 8.455453  | -3.149474 | -0.071289 |
|    | 123 | 1  | 0 | 8.631442  | -5.616069 | 0.385476  |
|    | 124 | 1  | 0 | 6.695198  | -6.891357 | 1.154980  |
|    | 125 | 30 | 0 | 3.494712  | 0.048927  | 0.342258  |
|    | 126 | 8  | 0 | 9.423941  | 0.426768  | -0.871592 |

|    |     |   |   |           |           |           |
|----|-----|---|---|-----------|-----------|-----------|
|    | 127 | 8 | 0 | 4.217219  | -5.861102 | 1.595311  |
|    | 128 | 8 | 0 | -2.465818 | -0.499979 | 1.604937  |
|    | 129 | 6 | 0 | 4.308397  | -7.248300 | 1.881535  |
|    | 130 | 1 | 0 | 5.032042  | -7.450552 | 2.681239  |
| 5  | 131 | 1 | 0 | 4.584585  | -7.828985 | 0.992153  |
|    | 132 | 1 | 0 | 3.313822  | -7.549765 | 2.212476  |
|    | 133 | 6 | 0 | 10.805026 | 0.437288  | -1.199685 |
|    | 134 | 1 | 0 | 11.401491 | 0.935458  | -0.425059 |
|    | 135 | 1 | 0 | 10.989179 | 0.925843  | -2.164966 |
| 10 | 136 | 1 | 0 | 11.102977 | -0.609840 | -1.264857 |
|    | 137 | 6 | 0 | -2.604407 | 0.458187  | 2.681926  |
|    | 138 | 1 | 0 | -2.832127 | -0.076795 | 3.608851  |
|    | 139 | 1 | 0 | -3.450545 | 1.088872  | 2.407230  |
|    | 140 | 1 | 0 | -1.693908 | 1.051888  | 2.767896  |
| 15 | 141 | 1 | 0 | 3.292270  | 5.892340  | 1.138320  |
|    | 142 | 8 | 0 | -1.234717 | 3.402821  | 2.314920  |
|    | 143 | 6 | 0 | -2.381429 | 4.159783  | 2.693619  |
|    | 144 | 1 | 0 | -3.177233 | 3.433704  | 2.856167  |
|    | 145 | 1 | 0 | -2.689293 | 4.846088  | 1.897699  |
| 20 | 146 | 1 | 0 | -2.204834 | 4.716215  | 3.622339  |

## Dimer of 9a

25 Standard orientation:

|    | Center Number | Atomic Number | Atomic Type | Coordinates (Angstroms) |           |           |
|----|---------------|---------------|-------------|-------------------------|-----------|-----------|
|    |               |               |             | X                       | Y         | Z         |
| 30 | 1             | 6             | 0           | 8.619535                | 1.644716  | 0.364801  |
|    | 2             | 6             | 0           | 7.131504                | 4.054779  | -0.132778 |
|    | 3             | 6             | 0           | 9.221042                | 2.912099  | 0.405059  |
|    | 4             | 6             | 0           | 7.240621                | 1.610590  | 0.073430  |
|    | 5             | 6             | 0           | 6.523170                | 2.802154  | -0.167859 |
| 35 | 6             | 6             | 0           | 8.491869                | 4.087094  | 0.160598  |
|    | 7             | 1             | 0           | 10.276910               | 3.004793  | 0.626898  |
|    | 8             | 1             | 0           | 9.013761                | 5.038863  | 0.202666  |
|    | 9             | 1             | 0           | 6.559738                | 4.954884  | -0.329285 |
|    | 10            | 6             | 0           | 6.276871                | 0.523579  | -0.072983 |
| 40 | 11            | 6             | 0           | 5.143692                | 2.408338  | -0.445945 |
|    | 12            | 7             | 0           | 5.041213                | 1.047398  | -0.363145 |
|    | 13            | 7             | 0           | 6.597933                | -0.762653 | 0.026084  |
|    | 14            | 6             | 0           | 5.753214                | -1.764790 | -0.209281 |
|    | 15            | 6             | 0           | 6.165723                | -3.165878 | -0.220740 |
| 45 | 16            | 6             | 0           | 5.025171                | -3.916469 | -0.577510 |
|    | 17            | 6             | 0           | 7.399807                | -3.762666 | 0.026048  |
|    | 18            | 1             | 0           | 8.263671                | -3.162804 | 0.289948  |
|    | 19            | 6             | 0           | 7.463558                | -5.148598 | -0.086276 |
|    | 20            | 1             | 0           | 8.401678                | -5.663899 | 0.099250  |
| 50 | 21            | 6             | 0           | 6.338805                | -5.911576 | -0.439489 |
|    | 22            | 1             | 0           | 6.454854                | -6.985862 | -0.511322 |
|    | 23            | 6             | 0           | 5.093271                | -5.319167 | -0.698834 |
|    | 24            | 6             | 0           | 3.949512                | -2.948692 | -0.770304 |

|    |    |    |   |           |           |           |
|----|----|----|---|-----------|-----------|-----------|
|    | 25 | 7  | 0 | 4.425095  | -1.684898 | -0.522665 |
|    | 26 | 7  | 0 | 2.724448  | -3.282612 | -1.164994 |
|    | 27 | 6  | 0 | 1.751410  | -2.408719 | -1.404482 |
|    | 28 | 6  | 0 | 0.422020  | -2.800251 | -1.868364 |
| 5  | 29 | 6  | 0 | -2.223123 | -2.906974 | -2.664215 |
|    | 30 | 6  | 0 | -0.328959 | -1.610497 | -1.978299 |
|    | 31 | 6  | 0 | -0.120730 | -4.046052 | -2.174272 |
|    | 32 | 6  | 0 | -1.449728 | -4.077966 | -2.585181 |
|    | 33 | 6  | 0 | -1.683263 | -1.653544 | -2.353534 |
| 10 | 34 | 1  | 0 | 0.477059  | -4.946284 | -2.087043 |
|    | 35 | 1  | 0 | -1.918674 | -5.025446 | -2.832129 |
|    | 36 | 1  | 0 | -3.261737 | -2.999081 | -2.955775 |
|    | 37 | 6  | 0 | 0.584790  | -0.523431 | -1.634570 |
|    | 38 | 7  | 0 | 1.799278  | -1.048017 | -1.282770 |
| 15 | 39 | 7  | 0 | 0.257741  | 0.762364  | -1.726401 |
|    | 40 | 6  | 0 | 1.109269  | 1.764451  | -1.521071 |
|    | 41 | 7  | 0 | 2.413209  | 1.682159  | -1.122036 |
|    | 42 | 7  | 0 | 4.187732  | 3.282320  | -0.750788 |
|    | 43 | 6  | 0 | 2.941752  | 2.947267  | -1.070083 |
| 20 | 44 | 6  | 0 | 0.758371  | 3.166793  | -1.735380 |
|    | 45 | 6  | 0 | 0.713295  | 5.915074  | -1.975026 |
|    | 46 | 6  | 0 | 1.919567  | 3.916552  | -1.453094 |
|    | 47 | 6  | 0 | -0.431281 | 3.765732  | -2.139757 |
|    | 48 | 6  | 0 | -0.433300 | 5.153812  | -2.249658 |
| 25 | 49 | 6  | 0 | 1.919486  | 5.319964  | -1.572735 |
|    | 50 | 1  | 0 | -1.311239 | 3.169134  | -2.352064 |
|    | 51 | 1  | 0 | -1.340012 | 5.670415  | -2.549632 |
|    | 52 | 1  | 0 | 0.646888  | 6.990820  | -2.079485 |
|    | 53 | 30 | 0 | 3.305257  | 0.000421  | -0.435004 |
| 30 | 54 | 6  | 0 | 2.889358  | 7.959813  | -1.530867 |
|    | 55 | 1  | 0 | 2.592512  | 8.111722  | -2.571281 |
|    | 56 | 1  | 0 | 3.777151  | 8.562877  | -1.328477 |
|    | 57 | 1  | 0 | 2.087936  | 8.279603  | -0.860549 |
|    | 58 | 6  | 0 | -4.253655 | -0.672811 | -3.022510 |
| 35 | 59 | 1  | 0 | -4.132630 | -1.044485 | -4.041733 |
|    | 60 | 1  | 0 | -4.870462 | 0.227757  | -3.041921 |
|    | 61 | 1  | 0 | -4.742647 | -1.419315 | -2.395795 |
|    | 62 | 6  | 0 | 4.253156  | -7.954320 | -1.203498 |
|    | 63 | 1  | 0 | 5.040790  | -8.085431 | -1.949250 |
| 40 | 64 | 1  | 0 | 3.390792  | -8.557313 | -1.495956 |
|    | 65 | 1  | 0 | 4.601983  | -8.292917 | -0.224902 |
|    | 66 | 6  | 0 | 11.194047 | 0.703592  | 0.994149  |
|    | 67 | 1  | 0 | 11.626155 | 1.217445  | 0.132210  |
|    | 68 | 1  | 0 | 11.771019 | -0.203576 | 1.186130  |
| 45 | 69 | 1  | 0 | 11.243023 | 1.343964  | 1.878059  |
|    | 70 | 6  | 0 | -1.919469 | -5.319955 | 1.572745  |
|    | 71 | 6  | 0 | 0.431289  | -3.765715 | 2.139779  |
|    | 72 | 6  | 0 | -0.713279 | -5.915061 | 1.975044  |
|    | 73 | 6  | 0 | -1.919555 | -3.916544 | 1.453103  |
| 50 | 74 | 6  | 0 | -0.758363 | -3.166782 | 1.735395  |
|    | 75 | 6  | 0 | 0.433312  | -5.153795 | 2.249681  |
|    | 76 | 1  | 0 | -0.646869 | -6.990807 | 2.079505  |
|    | 77 | 1  | 0 | 1.340024  | -5.670394 | 2.549662  |
|    | 78 | 1  | 0 | 1.311243  | -3.169113 | 2.352090  |

|    |     |    |   |            |           |           |
|----|-----|----|---|------------|-----------|-----------|
|    | 79  | 6  | 0 | -2.941741  | -2.947263 | 1.070086  |
|    | 80  | 6  | 0 | -1.109266  | -1.764441 | 1.521082  |
|    | 81  | 7  | 0 | -2.413203  | -1.682154 | 1.122037  |
|    | 82  | 7  | 0 | -4.187718  | -3.282322 | 0.750785  |
| 5  | 83  | 6  | 0 | -5.143679  | -2.408345 | 0.445934  |
|    | 84  | 6  | 0 | -6.523153  | -2.802166 | 0.167836  |
|    | 85  | 6  | 0 | -7.240607  | -1.610605 | -0.073458 |
|    | 86  | 6  | 0 | -7.131481  | -4.054794 | 0.132749  |
|    | 87  | 1  | 0 | -6.559713  | -4.954896 | 0.329261  |
| 10 | 88  | 6  | 0 | -8.491844  | -4.087114 | -0.160637 |
|    | 89  | 1  | 0 | -9.013731  | -5.038886 | -0.202709 |
|    | 90  | 6  | 0 | -9.221020  | -2.912122 | -0.405103 |
|    | 91  | 1  | 0 | -10.276886 | -3.004821 | -0.626950 |
|    | 92  | 6  | 0 | -8.619519  | -1.644737 | -0.364840 |
| 15 | 93  | 6  | 0 | -6.276864  | -0.523590 | 0.072965  |
|    | 94  | 7  | 0 | -5.041204  | -1.047405 | 0.363133  |
|    | 95  | 7  | 0 | -6.597931  | 0.762640  | -0.026100 |
|    | 96  | 6  | 0 | -5.753218  | 1.764782  | 0.209275  |
|    | 97  | 6  | 0 | -6.165734  | 3.165867  | 0.220738  |
| 20 | 98  | 6  | 0 | -6.338831  | 5.911563  | 0.439494  |
|    | 99  | 6  | 0 | -5.025188  | 3.916463  | 0.577515  |
|    | 100 | 6  | 0 | -7.399820  | 3.762650  | -0.026055 |
|    | 101 | 6  | 0 | -7.463578  | 5.148581  | 0.086273  |
|    | 102 | 6  | 0 | -5.093294  | 5.319160  | 0.698843  |
| 25 | 103 | 1  | 0 | -8.263680  | 3.162785  | -0.289961 |
|    | 104 | 1  | 0 | -8.401699  | 5.663879  | -0.099256 |
|    | 105 | 1  | 0 | -6.454884  | 6.985848  | 0.511329  |
|    | 106 | 6  | 0 | -3.949525  | 2.948690  | 0.770313  |
|    | 107 | 7  | 0 | -4.425101  | 1.684895  | 0.522666  |
| 30 | 108 | 7  | 0 | -2.724464  | 3.282614  | 1.165007  |
|    | 109 | 6  | 0 | -1.751421  | 2.408726  | 1.404494  |
|    | 110 | 7  | 0 | -1.799283  | 1.048023  | 1.282779  |
|    | 111 | 7  | 0 | -0.257740  | -0.762351 | 1.726413  |
|    | 112 | 6  | 0 | -0.584793  | 0.523443  | 1.634581  |
| 35 | 113 | 6  | 0 | -0.422034  | 2.800263  | 1.868381  |
|    | 114 | 6  | 0 | 2.223106   | 2.906995  | 2.664241  |
|    | 115 | 6  | 0 | 0.328951   | 1.610512  | 1.978312  |
|    | 116 | 6  | 0 | 0.120708   | 4.046065  | 2.174296  |
|    | 117 | 6  | 0 | 1.449705   | 4.077984  | 2.585210  |
| 40 | 118 | 6  | 0 | 1.683254   | 1.653564  | 2.353551  |
|    | 119 | 1  | 0 | -0.477085  | 4.946295  | 2.087069  |
|    | 120 | 1  | 0 | 1.918645   | 5.025465  | 2.832166  |
|    | 121 | 1  | 0 | 3.261717   | 2.999107  | 2.955807  |
|    | 122 | 30 | 0 | -3.305255  | -0.000417 | 0.435001  |
| 45 | 123 | 6  | 0 | 4.253647   | 0.672830  | 3.022537  |
|    | 124 | 1  | 0 | 4.742636   | 1.419352  | 2.395841  |
|    | 125 | 1  | 0 | 4.870462   | -0.227734 | 3.041928  |
|    | 126 | 1  | 0 | 4.132618   | 1.044481  | 4.041767  |
|    | 127 | 6  | 0 | -4.253195  | 7.954315  | 1.203525  |
| 50 | 128 | 1  | 0 | -4.602020  | 8.292916  | 0.224929  |
|    | 129 | 1  | 0 | -3.390835  | 8.557310  | 1.495991  |
|    | 130 | 1  | 0 | -5.040833  | 8.085416  | 1.949274  |
|    | 131 | 6  | 0 | -11.194028 | -0.703624 | -0.994212 |
|    | 132 | 1  | 0 | -11.242992 | -1.343995 | -1.878123 |

|    |     |    |   |            |           |           |
|----|-----|----|---|------------|-----------|-----------|
|    | 133 | 1  | 0 | -11.771002 | 0.203542  | -1.186199 |
|    | 134 | 1  | 0 | -11.626144 | -1.217478 | -0.132277 |
|    | 135 | 6  | 0 | -2.889331  | -7.959809 | 1.530872  |
|    | 136 | 1  | 0 | -2.087904  | -8.279594 | 0.860559  |
| 5  | 137 | 1  | 0 | -3.777120  | -8.562876 | 1.328476  |
|    | 138 | 1  | 0 | -2.592492  | -8.111717 | 2.571288  |
|    | 139 | 16 | 0 | -9.495524  | -0.123941 | -0.661318 |
|    | 140 | 16 | 0 | -3.638313  | 6.236155  | 1.158203  |
|    | 141 | 16 | 0 | -2.645141  | -0.139569 | -2.341482 |
| 10 | 142 | 16 | 0 | 3.402659   | 6.237180  | -1.213397 |
|    | 143 | 16 | 0 | 2.645138   | 0.139592  | 2.341495  |
|    | 144 | 16 | 0 | 9.495536   | 0.123916  | 0.661274  |
|    | 145 | 16 | 0 | 3.638283   | -6.236157 | -1.158185 |
|    | 146 | 16 | 0 | -3.402637  | -6.237177 | 1.213399  |

15

### Dimer of 9b

Standard orientation:

| Center Number | Atomic Number | Atomic Type | Coordinates (Angstroms) |           |           |           |
|---------------|---------------|-------------|-------------------------|-----------|-----------|-----------|
|               |               |             | X                       | Y         | Z         |           |
|               | 1             | 6           | 0                       | 0.440683  | 3.907337  | -2.337160 |
|               | 2             | 6           | 0                       | -1.902659 | 5.314840  | -1.502725 |
| 25            | 3             | 6           | 0                       | 0.364436  | 5.308286  | -2.356688 |
|               | 4             | 6           | 0                       | -0.677380 | 3.201567  | -1.845733 |
|               | 5             | 6           | 0                       | -1.830687 | 3.925735  | -1.466394 |
|               | 6             | 6           | 0                       | -0.776315 | 6.005613  | -1.937425 |
|               | 7             | 1           | 0                       | 1.220122  | 5.860029  | -2.731892 |
| 30            | 8             | 1           | 0                       | -0.781034 | 7.090728  | -1.978732 |
|               | 9             | 1           | 0                       | -2.811338 | 5.821723  | -1.196969 |
|               | 10            | 6           | 0                       | -1.013697 | 1.783234  | -1.611599 |
|               | 11            | 6           | 0                       | -2.834629 | 2.950504  | -1.063937 |
|               | 12            | 7           | 0                       | -2.310764 | 1.696057  | -1.164724 |
| 35            | 13            | 7           | 0                       | -0.180169 | 0.761576  | -1.801301 |
|               | 14            | 6           | 0                       | -0.525915 | -0.522058 | -1.696140 |
|               | 15            | 6           | 0                       | 0.392089  | -1.639254 | -1.947985 |
|               | 16            | 6           | 0                       | -0.398359 | -2.807753 | -1.902709 |
|               | 17            | 6           | 0                       | 1.776758  | -1.741735 | -2.183060 |
| 40            | 18            | 6           | 0                       | 2.303426  | -3.018323 | -2.411725 |
|               | 19            | 1           | 0                       | 3.363326  | -3.146528 | -2.591172 |
|               | 20            | 6           | 0                       | 1.490556  | -4.163556 | -2.397119 |
|               | 21            | 1           | 0                       | 1.949937  | -5.130358 | -2.579110 |
|               | 22            | 6           | 0                       | 0.128617  | -4.076191 | -2.133150 |
| 45            | 23            | 6           | 0                       | -1.753010 | -2.381398 | -1.575672 |
|               | 24            | 7           | 0                       | -1.775514 | -1.022351 | -1.438609 |
|               | 25            | 7           | 0                       | -2.771017 | -3.228642 | -1.475964 |
|               | 26            | 6           | 0                       | -4.015328 | -2.864197 | -1.184139 |
|               | 27            | 6           | 0                       | -5.134465 | -3.796589 | -1.221490 |
| 50            | 28            | 6           | 0                       | -7.587419 | -5.046202 | -1.230321 |
|               | 29            | 6           | 0                       | -6.293017 | -3.051252 | -0.915203 |
|               | 30            | 6           | 0                       | -5.172107 | -5.155878 | -1.521739 |
|               | 31            | 6           | 0                       | -6.419514 | -5.771197 | -1.510049 |



|    |    |    |   |            |           |           |
|----|----|----|---|------------|-----------|-----------|
|    | 32 | 6  | 0 | -7.561194  | -3.672710 | -0.939888 |
|    | 33 | 1  | 0 | -4.261640  | -5.695496 | -1.756759 |
|    | 34 | 1  | 0 | -6.504915  | -6.831270 | -1.731224 |
|    | 35 | 1  | 0 | -8.532103  | -5.574864 | -1.252346 |
| 5  | 36 | 6  | 0 | -5.834480  | -1.680580 | -0.664490 |
|    | 37 | 7  | 0 | -4.473872  | -1.620980 | -0.844486 |
|    | 38 | 7  | 0 | -6.642673  | -0.678157 | -0.308574 |
|    | 39 | 6  | 0 | -6.267087  | 0.595813  | -0.208822 |
|    | 40 | 7  | 0 | -5.009446  | 1.088389  | -0.474393 |
| 10 | 41 | 7  | 0 | -4.061128  | 3.305713  | -0.696259 |
|    | 42 | 6  | 0 | -5.041208  | 2.450698  | -0.427077 |
|    | 43 | 6  | 0 | -7.167654  | 1.722754  | 0.108213  |
|    | 44 | 6  | 0 | -8.241122  | 4.303757  | 0.381183  |
|    | 45 | 6  | 0 | -6.384437  | 2.887405  | -0.072771 |
| 15 | 46 | 6  | 0 | -8.517103  | 1.862576  | 0.497721  |
|    | 47 | 6  | 0 | -9.024490  | 3.166214  | 0.615615  |
|    | 48 | 6  | 0 | -6.896453  | 4.175659  | 0.048893  |
|    | 49 | 1  | 0 | -10.058683 | 3.285063  | 0.922145  |
|    | 50 | 1  | 0 | -8.687695  | 5.287682  | 0.489068  |
| 20 | 51 | 30 | 0 | -3.288431  | 0.016347  | -0.580163 |
|    | 52 | 6  | 0 | -10.360713 | -3.922319 | -0.870840 |
|    | 53 | 1  | 0 | -11.282141 | -3.354102 | -0.726678 |
|    | 54 | 1  | 0 | -10.321761 | -4.722019 | -0.127071 |
|    | 55 | 1  | 0 | -10.363900 | -4.345045 | -1.878316 |
| 25 | 56 | 6  | 0 | 1.374950   | 2.199988  | -4.353732 |
|    | 57 | 1  | 0 | 0.807982   | 2.829818  | -5.042100 |
|    | 58 | 1  | 0 | 0.779681   | 1.353471  | -4.012250 |
|    | 59 | 1  | 0 | 2.271213   | 1.832486  | -4.858305 |
|    | 60 | 1  | 0 | -6.255125  | 5.034667  | -0.114731 |
| 30 | 61 | 1  | 0 | -0.509844  | -4.951792 | -2.097989 |
|    | 62 | 6  | 0 | 4.416889   | -0.867157 | -2.678880 |
|    | 63 | 1  | 0 | 4.846335   | -1.591598 | -1.985868 |
|    | 64 | 1  | 0 | 5.055761   | 0.017220  | -2.708144 |
|    | 65 | 1  | 0 | 4.347350   | -1.289785 | -3.682958 |
| 35 | 66 | 6  | 0 | -8.806159  | -0.388240 | 2.166054  |
|    | 67 | 1  | 0 | -9.526496  | -1.124484 | 2.528920  |
|    | 68 | 1  | 0 | -8.532304  | 0.280877  | 2.984713  |
|    | 69 | 1  | 0 | -7.935586  | -0.906166 | 1.764824  |
|    | 70 | 6  | 0 | 8.517045   | 1.861521  | -0.499937 |
| 40 | 71 | 6  | 0 | 6.897162   | 4.175152  | -0.051062 |
|    | 72 | 6  | 0 | 9.024780   | 3.165001  | -0.618108 |
|    | 73 | 6  | 0 | 7.167658   | 1.722157  | -0.109977 |
|    | 74 | 6  | 0 | 6.384809   | 2.887072  | 0.070955  |
|    | 75 | 6  | 0 | 8.241803   | 4.302798  | -0.383643 |
| 45 | 76 | 1  | 0 | 10.058915  | 3.283525  | -0.924968 |
|    | 77 | 1  | 0 | 8.688646   | 5.286574  | -0.491770 |
|    | 78 | 1  | 0 | 6.256116   | 5.034375  | 0.112538  |
|    | 79 | 6  | 0 | 6.266931   | 0.595568  | 0.207802  |
|    | 80 | 6  | 0 | 5.041575   | 2.450814  | 0.425796  |
| 50 | 81 | 7  | 0 | 5.009473   | 1.088538  | 0.473557  |
|    | 82 | 7  | 0 | 6.642285   | -0.678424 | 0.308141  |
|    | 83 | 6  | 0 | 5.833991   | -1.680509 | 0.664723  |
|    | 84 | 6  | 0 | 6.292333   | -3.051144 | 0.915976  |
|    | 85 | 6  | 0 | 5.133701   | -3.796155 | 1.222751  |

|    |     |    |   |           |           |           |
|----|-----|----|---|-----------|-----------|-----------|
|    | 86  | 6  | 0 | 7.560416  | -3.672776 | 0.940742  |
|    | 87  | 6  | 0 | 7.586477  | -5.046139 | 1.231818  |
|    | 88  | 1  | 0 | 8.531084  | -5.574933 | 1.253964  |
|    | 89  | 6  | 0 | 6.418497  | -5.770821 | 1.512033  |
| 5  | 90  | 1  | 0 | 6.503760  | -6.830805 | 1.733688  |
|    | 91  | 6  | 0 | 5.171180  | -5.155312 | 1.523597  |
|    | 92  | 6  | 0 | 4.014715  | -2.863581 | 1.185119  |
|    | 93  | 7  | 0 | 4.473416  | -1.620600 | 0.844889  |
|    | 94  | 7  | 0 | 2.770358  | -3.227684 | 1.477194  |
| 10 | 95  | 6  | 0 | 1.752529  | -2.380186 | 1.576632  |
|    | 96  | 6  | 0 | 0.397832  | -2.806149 | 1.903977  |
|    | 97  | 6  | 0 | -2.303957 | -3.016131 | 2.413139  |
|    | 98  | 6  | 0 | -0.392413 | -1.637492 | 1.948853  |
|    | 99  | 6  | 0 | -0.129324 | -4.074419 | 2.134924  |
| 15 | 100 | 6  | 0 | -1.491263 | -4.161490 | 2.398987  |
|    | 101 | 6  | 0 | -1.777104 | -1.739715 | 2.183966  |
|    | 102 | 1  | 0 | 0.509015  | -4.950120 | 2.100057  |
|    | 103 | 1  | 0 | -1.950778 | -5.128151 | 2.581378  |
|    | 104 | 1  | 0 | -3.363875 | -3.144081 | 2.592680  |
| 20 | 105 | 6  | 0 | 0.525829  | -0.520549 | 1.696613  |
|    | 106 | 7  | 0 | 1.775280  | -1.021208 | 1.439036  |
|    | 107 | 7  | 0 | 0.180458  | 0.763197  | 1.801592  |
|    | 108 | 6  | 0 | 1.014220  | 1.784605  | 1.611580  |
|    | 109 | 7  | 0 | 2.311117  | 1.697017  | 1.164241  |
| 25 | 110 | 7  | 0 | 4.061809  | 3.306141  | 0.695131  |
|    | 111 | 6  | 0 | 2.835335  | 2.951290  | 1.063255  |
|    | 112 | 6  | 0 | 0.678449  | 3.203057  | 1.845852  |
|    | 113 | 6  | 0 | 0.778530  | 6.007107  | 1.937639  |
|    | 114 | 6  | 0 | 1.831858  | 3.926834  | 1.466085  |
| 30 | 115 | 6  | 0 | -0.439145 | 3.909265  | 2.337769  |
|    | 116 | 6  | 0 | -0.362307 | 5.310184  | 2.357340  |
|    | 117 | 6  | 0 | 1.904415  | 5.315910  | 1.502447  |
|    | 118 | 1  | 0 | -1.217611 | 5.862248  | 2.732946  |
|    | 119 | 1  | 0 | 0.783682  | 7.092217  | 1.979031  |
| 35 | 120 | 30 | 0 | 3.288269  | 0.016925  | 0.580002  |
|    | 121 | 6  | 0 | -4.417110 | -0.864585 | 2.679511  |
|    | 122 | 1  | 0 | -5.055935 | 0.019848  | 2.708065  |
|    | 123 | 1  | 0 | -4.347578 | -1.286428 | 3.683919  |
|    | 124 | 1  | 0 | -4.846610 | -1.589543 | 1.987068  |
| 40 | 125 | 6  | 0 | 8.804318  | -0.390227 | -2.167464 |
|    | 126 | 1  | 0 | 8.529401  | 0.278605  | -2.986001 |
|    | 127 | 1  | 0 | 7.934307  | -0.908217 | -1.765110 |
|    | 128 | 1  | 0 | 9.524454  | -1.126368 | -2.530937 |
|    | 129 | 1  | 0 | 2.813191  | 5.822410  | 1.196346  |
| 45 | 130 | 1  | 0 | 4.260666  | -5.694699 | 1.758967  |
|    | 131 | 6  | 0 | 10.359835 | -3.922918 | 0.871106  |
|    | 132 | 1  | 0 | 10.363267 | -4.345156 | 1.878787  |
|    | 133 | 1  | 0 | 11.281337 | -3.354967 | 0.726368  |
|    | 134 | 1  | 0 | 10.320477 | -4.722971 | 0.127739  |
| 50 | 135 | 6  | 0 | -1.373648 | 2.201749  | 4.354226  |
|    | 136 | 1  | 0 | -2.269965 | 1.834511  | 4.858895  |
|    | 137 | 1  | 0 | -0.806128 | 2.830947  | 5.042720  |
|    | 138 | 1  | 0 | -0.778948 | 1.355071  | 4.012163  |
|    | 139 | 16 | 0 | 9.018788  | -2.705082 | 0.649096  |

|       |    |   |           |           |           |
|-------|----|---|-----------|-----------|-----------|
| 140   | 16 | 0 | 9.664609  | 0.537559  | -0.845681 |
| 141   | 16 | 0 | 1.966284  | 3.183469  | -2.927110 |
| 142   | 16 | 0 | 2.784126  | -0.263729 | -2.128795 |
| 143   | 16 | 0 | -2.784338 | -0.261656 | 2.128904  |
| 5 144 | 16 | 0 | -1.964893 | 3.186209  | 2.928246  |
| 145   | 16 | 0 | -9.665173 | 0.538907  | 0.843016  |
| 146   | 16 | 0 | -9.019465 | -2.704643 | -0.649006 |

---

10

### Dimer of 9c

Standard orientation:

| Center<br>15 Number | Atomic<br>Number | Atomic<br>Type | Coordinates (Angstroms) |           |           |
|---------------------|------------------|----------------|-------------------------|-----------|-----------|
|                     |                  |                | X                       | Y         | Z         |
| 1                   | 6                | 0              | 0.444804                | 4.443466  | -2.314272 |
| 2                   | 6                | 0              | 2.051794                | 2.093072  | -2.449585 |
| 3                   | 6                | 0              | 1.783927                | 4.520448  | -2.677559 |
| 20 4                | 6                | 0              | -0.078719               | 3.185186  | -2.024838 |
| 5                   | 6                | 0              | 0.690871                | 2.001278  | -2.092380 |
| 6                   | 6                | 0              | 2.571477                | 3.360632  | -2.741268 |
| 7                   | 1                | 0              | 2.235807                | 5.480345  | -2.906400 |
| 8                   | 1                | 0              | 3.618504                | 3.440172  | -3.013961 |
| 25 9                | 6                | 0              | -1.410917               | 2.801832  | -1.577635 |
| 10                  | 6                | 0              | -0.227114               | 0.915709  | -1.713554 |
| 11                  | 7                | 0              | -1.452167               | 1.447762  | -1.402678 |
| 12                  | 7                | 0              | -2.384493               | 3.688677  | -1.395259 |
| 13                  | 6                | 0              | -3.613361               | 3.363421  | -1.011986 |
| 30 14               | 6                | 0              | -4.688836               | 4.342544  | -0.869458 |
| 15                  | 6                | 0              | -5.844459               | 3.618239  | -0.509761 |
| 16                  | 6                | 0              | -4.705163               | 5.724928  | -1.039430 |
| 17                  | 1                | 0              | -3.806264               | 6.260679  | -1.323214 |
| 18                  | 6                | 0              | -5.918849               | 6.373324  | -0.828968 |
| 35 19               | 1                | 0              | -5.983517               | 7.451410  | -0.945349 |
| 20                  | 6                | 0              | -7.077952               | 5.667791  | -0.467366 |
| 21                  | 1                | 0              | -7.991171               | 6.230492  | -0.318257 |
| 22                  | 6                | 0              | -7.074891               | 4.274081  | -0.301826 |
| 23                  | 6                | 0              | -5.438070               | 2.216980  | -0.454460 |
| 40 24               | 7                | 0              | -4.099014               | 2.115668  | -0.731739 |
| 25                  | 7                | 0              | -6.285754               | 1.218355  | -0.231825 |
| 26                  | 6                | 0              | -5.957117               | -0.069136 | -0.299225 |
| 27                  | 6                | 0              | -6.953727               | -1.130843 | -0.246338 |
| 28                  | 6                | 0              | -8.373032               | -3.483098 | -0.360047 |
| 45 29               | 6                | 0              | -6.263729               | -2.343691 | -0.455002 |
| 30                  | 6                | 0              | -8.334276               | -1.065028 | -0.079611 |
| 31                  | 6                | 0              | -9.031793               | -2.267951 | -0.125649 |
| 32                  | 6                | 0              | -6.982719               | -3.555670 | -0.547626 |
| 33                  | 1                | 0              | -8.828572               | -0.112137 | 0.071716  |
| 50 34               | 1                | 0              | -10.109872              | -2.276783 | 0.007158  |
| 35                  | 1                | 0              | -8.970049               | -4.385071 | -0.405549 |
| 36                  | 6                | 0              | -4.845405               | -1.983820 | -0.579917 |
| 37                  | 7                | 0              | -4.719821               | -0.617632 | -0.487079 |

|    |    |    |   |            |           |           |
|----|----|----|---|------------|-----------|-----------|
|    | 38 | 7  | 0 | -3.863570  | -2.868299 | -0.750574 |
|    | 39 | 6  | 0 | -2.586158  | -2.559412 | -0.975421 |
|    | 40 | 7  | 0 | -2.072871  | -1.291031 | -1.107473 |
|    | 41 | 7  | 0 | 0.090787   | -0.375999 | -1.719721 |
| 5  | 42 | 6  | 0 | -0.755106  | -1.370213 | -1.449955 |
|    | 43 | 6  | 0 | -1.509831  | -3.541157 | -1.206019 |
|    | 44 | 6  | 0 | 0.932820   | -4.736337 | -1.900127 |
|    | 45 | 6  | 0 | -0.365928  | -2.773057 | -1.531014 |
|    | 46 | 6  | 0 | -1.406818  | -4.948348 | -1.179063 |
| 10 | 47 | 6  | 0 | -0.175475  | -5.513952 | -1.545077 |
|    | 48 | 6  | 0 | 0.853709   | -3.347662 | -1.878929 |
|    | 49 | 1  | 0 | -0.083322  | -6.594757 | -1.519610 |
|    | 50 | 1  | 0 | 1.867176   | -5.225359 | -2.158116 |
|    | 51 | 30 | 0 | -2.980124  | 0.423610  | -0.534231 |
| 15 | 52 | 6  | 0 | -7.479035  | -6.281795 | -1.026301 |
|    | 53 | 1  | 0 | -7.987132  | -6.411130 | -0.067493 |
|    | 54 | 1  | 0 | -6.989222  | -7.221006 | -1.292310 |
|    | 55 | 1  | 0 | -8.203048  | -6.031530 | -1.805467 |
|    | 56 | 6  | 0 | -9.790469  | 4.616374  | 0.343239  |
| 20 | 57 | 1  | 0 | -9.536699  | 5.331617  | 1.129219  |
|    | 58 | 1  | 0 | -10.693849 | 4.077969  | 0.637654  |
|    | 59 | 1  | 0 | -9.985978  | 5.140931  | -0.594995 |
|    | 60 | 1  | 0 | 1.709416   | -2.726586 | -2.114383 |
|    | 61 | 1  | 0 | -0.184755  | 5.323617  | -2.242145 |
| 25 | 62 | 6  | 0 | -3.127021  | -5.573536 | 0.961221  |
|    | 63 | 1  | 0 | -3.814353  | -6.331798 | 1.342207  |
|    | 64 | 1  | 0 | -3.628539  | -4.606806 | 0.948397  |
|    | 65 | 1  | 0 | -2.231343  | -5.546573 | 1.583450  |
|    | 66 | 6  | 0 | 2.618779   | -0.408781 | -3.704647 |
| 30 | 67 | 1  | 0 | 1.617891   | -0.748347 | -3.444686 |
|    | 68 | 1  | 0 | 3.317093   | -1.248887 | -3.715306 |
|    | 69 | 1  | 0 | 2.634543   | 0.084409  | -4.678029 |
|    | 70 | 6  | 0 | 8.715286   | -1.545020 | -1.044525 |
|    | 71 | 6  | 0 | 7.258536   | -3.966773 | -0.521343 |
| 35 | 72 | 6  | 0 | 9.299397   | -2.797042 | -1.219223 |
|    | 73 | 6  | 0 | 7.392065   | -1.519653 | -0.612849 |
|    | 74 | 6  | 0 | 6.665425   | -2.700123 | -0.352059 |
|    | 75 | 6  | 0 | 8.590658   | -3.981478 | -0.964740 |
|    | 76 | 1  | 0 | 10.328410  | -2.871174 | -1.559095 |
| 40 | 77 | 1  | 0 | 9.101346   | -4.923961 | -1.117966 |
|    | 78 | 6  | 0 | 6.492858   | -0.403651 | -0.319277 |
|    | 79 | 6  | 0 | 5.342953   | -2.267477 | 0.093443  |
|    | 80 | 7  | 0 | 5.280789   | -0.897643 | 0.073372  |
|    | 81 | 7  | 0 | 6.871364   | 0.869014  | -0.388502 |
| 45 | 82 | 6  | 0 | 6.085444   | 1.888034  | -0.049309 |
|    | 83 | 6  | 0 | 6.548038   | 3.275449  | -0.033356 |
|    | 84 | 6  | 0 | 5.459118   | 4.055734  | 0.407357  |
|    | 85 | 6  | 0 | 7.781468   | 3.837012  | -0.351756 |
|    | 86 | 1  | 0 | 8.605113   | 3.216158  | -0.685932 |
| 50 | 87 | 6  | 0 | 7.899848   | 5.218192  | -0.220060 |
|    | 88 | 1  | 0 | 8.840839   | 5.705847  | -0.458074 |
|    | 89 | 6  | 0 | 6.826684   | 6.009817  | 0.217944  |
|    | 90 | 1  | 0 | 6.982588   | 7.078242  | 0.300517  |
|    | 91 | 6  | 0 | 5.580238   | 5.452651  | 0.545674  |

|    |     |    |   |           |           |           |
|----|-----|----|---|-----------|-----------|-----------|
|    | 92  | 6  | 0 | 4.362737  | 3.118997  | 0.641985  |
|    | 93  | 7  | 0 | 4.781668  | 1.843956  | 0.354573  |
|    | 94  | 7  | 0 | 3.161391  | 3.488400  | 1.067911  |
|    | 95  | 6  | 0 | 2.162806  | 2.642713  | 1.313497  |
| 5  | 96  | 6  | 0 | 0.840607  | 3.085161  | 1.737453  |
|    | 97  | 6  | 0 | -1.819483 | 3.328574  | 2.422569  |
|    | 98  | 6  | 0 | 0.050806  | 1.922585  | 1.878178  |
|    | 99  | 6  | 0 | 0.337484  | 4.363731  | 1.967931  |
|    | 100 | 6  | 0 | -1.001060 | 4.466522  | 2.328395  |
| 10 | 101 | 6  | 0 | -1.318144 | 2.043020  | 2.188220  |
|    | 102 | 1  | 0 | 0.975793  | 5.233387  | 1.858806  |
|    | 103 | 1  | 0 | -1.441021 | 5.440769  | 2.518526  |
|    | 104 | 1  | 0 | -2.865491 | 3.469899  | 2.664000  |
|    | 105 | 6  | 0 | 0.948269  | 0.793053  | 1.610431  |
| 15 | 106 | 7  | 0 | 2.173973  | 1.280106  | 1.231224  |
|    | 107 | 7  | 0 | 0.628660  | -0.481755 | 1.829581  |
|    | 108 | 6  | 0 | 1.450037  | -1.513642 | 1.640126  |
|    | 109 | 7  | 0 | 2.680492  | -1.465111 | 1.026731  |
|    | 110 | 7  | 0 | 4.399405  | -3.100546 | 0.512548  |
| 20 | 111 | 6  | 0 | 3.215756  | -2.718774 | 0.991960  |
|    | 112 | 6  | 0 | 1.181209  | -2.897911 | 2.067650  |
|    | 113 | 6  | 0 | 1.380531  | -5.664355 | 2.501581  |
|    | 114 | 6  | 0 | 2.295375  | -3.650415 | 1.626416  |
|    | 115 | 6  | 0 | 0.160204  | -3.548336 | 2.792337  |
| 25 | 116 | 6  | 0 | 0.286844  | -4.932476 | 2.985865  |
|    | 117 | 6  | 0 | 2.413362  | -5.023361 | 1.826539  |
|    | 118 | 1  | 0 | -0.485532 | -5.440967 | 3.553919  |
|    | 119 | 1  | 0 | 1.425557  | -6.733920 | 2.683585  |
|    | 120 | 30 | 0 | 3.590493  | 0.188070  | 0.293650  |
| 30 | 121 | 6  | 0 | -3.948457 | 1.198692  | 2.806855  |
|    | 122 | 1  | 0 | -3.830164 | 1.608500  | 3.811677  |
|    | 123 | 1  | 0 | -4.597461 | 0.322312  | 2.853226  |
|    | 124 | 1  | 0 | -4.399420 | 1.936945  | 2.142709  |
|    | 125 | 6  | 0 | 4.861591  | 8.102768  | 1.153220  |
| 35 | 126 | 1  | 0 | 5.696653  | 8.191697  | 1.852091  |
|    | 127 | 1  | 0 | 4.038884  | 8.726179  | 1.509939  |
|    | 128 | 1  | 0 | 5.161269  | 8.451998  | 0.162204  |
|    | 129 | 1  | 0 | 3.289001  | -5.553539 | 1.467998  |
|    | 130 | 1  | 0 | 9.255991  | -0.624493 | -1.233668 |
| 40 | 131 | 6  | 0 | -0.606861 | -1.581016 | 4.657547  |
|    | 132 | 1  | 0 | -1.458338 | -1.176413 | 5.209383  |
|    | 133 | 1  | 0 | -0.098001 | -0.774397 | 4.130870  |
|    | 134 | 1  | 0 | 0.066051  | -2.084068 | 5.354751  |
|    | 135 | 6  | 0 | 7.498810  | -6.768833 | -0.566179 |
| 45 | 136 | 1  | 0 | 7.802663  | -6.754866 | -1.615567 |
|    | 137 | 1  | 0 | 6.956594  | -7.696373 | -0.370430 |
|    | 138 | 1  | 0 | 8.377848  | -6.733894 | 0.081627  |
|    | 139 | 16 | 0 | -8.511798 | 3.327884  | 0.152652  |
|    | 140 | 16 | 0 | -6.126581 | -5.060186 | -0.933069 |
| 50 | 141 | 16 | 0 | -2.698649 | -6.099962 | -0.738778 |
|    | 142 | 16 | 0 | -1.308782 | -2.780233 | 3.465590  |
|    | 143 | 16 | 0 | -2.349570 | 0.578801  | 2.179774  |
|    | 144 | 16 | 0 | 3.238503  | 0.748333  | -2.430399 |
|    | 145 | 16 | 0 | 6.313834  | -5.435564 | -0.178637 |

146                      16                      0                      4.187746                      6.406822                      1.109636

-----

### Dimer of 9d

Standard orientation:

|    | Center Number | Atomic Number | Atomic Type | Coordinates (Angstroms) |           |           |
|----|---------------|---------------|-------------|-------------------------|-----------|-----------|
|    |               |               |             | X                       | Y         | Z         |
| 10 | 1             | 6             | 0           | 0.444804                | 4.443466  | -2.314272 |
|    | 2             | 6             | 0           | 2.051794                | 2.093072  | -2.449585 |
|    | 3             | 6             | 0           | 1.783927                | 4.520448  | -2.677559 |
|    | 4             | 6             | 0           | -0.078719               | 3.185186  | -2.024838 |
|    | 5             | 6             | 0           | 0.690871                | 2.001278  | -2.092380 |
| 15 | 6             | 6             | 0           | 2.571477                | 3.360632  | -2.741268 |
|    | 7             | 1             | 0           | 2.235807                | 5.480345  | -2.906400 |
|    | 8             | 1             | 0           | 3.618504                | 3.440172  | -3.013961 |
|    | 9             | 6             | 0           | -1.410917               | 2.801832  | -1.577635 |
|    | 10            | 6             | 0           | -0.227114               | 0.915709  | -1.713554 |
| 20 | 11            | 7             | 0           | -1.452167               | 1.447762  | -1.402678 |
|    | 12            | 7             | 0           | -2.384493               | 3.688677  | -1.395259 |
|    | 13            | 6             | 0           | -3.613361               | 3.363421  | -1.011986 |
|    | 14            | 6             | 0           | -4.688836               | 4.342544  | -0.869458 |
|    | 15            | 6             | 0           | -5.844459               | 3.618239  | -0.509761 |
| 25 | 16            | 6             | 0           | -4.705163               | 5.724928  | -1.039430 |
|    | 17            | 1             | 0           | -3.806264               | 6.260679  | -1.323214 |
|    | 18            | 6             | 0           | -5.918849               | 6.373324  | -0.828968 |
|    | 19            | 1             | 0           | -5.983517               | 7.451410  | -0.945349 |
|    | 20            | 6             | 0           | -7.077952               | 5.667791  | -0.467366 |
| 30 | 21            | 1             | 0           | -7.991171               | 6.230492  | -0.318257 |
|    | 22            | 6             | 0           | -7.074891               | 4.274081  | -0.301826 |
|    | 23            | 6             | 0           | -5.438070               | 2.216980  | -0.454460 |
|    | 24            | 7             | 0           | -4.099014               | 2.115668  | -0.731739 |
|    | 25            | 7             | 0           | -6.285754               | 1.218355  | -0.231825 |
| 35 | 26            | 6             | 0           | -5.957117               | -0.069136 | -0.299225 |
|    | 27            | 6             | 0           | -6.953727               | -1.130843 | -0.246338 |
|    | 28            | 6             | 0           | -8.373032               | -3.483098 | -0.360047 |
|    | 29            | 6             | 0           | -6.263729               | -2.343691 | -0.455002 |
|    | 30            | 6             | 0           | -8.334276               | -1.065028 | -0.079611 |
| 40 | 31            | 6             | 0           | -9.031793               | -2.267951 | -0.125649 |
|    | 32            | 6             | 0           | -6.982719               | -3.555670 | -0.547626 |
|    | 33            | 1             | 0           | -8.828572               | -0.112137 | 0.071716  |
|    | 34            | 1             | 0           | -10.109872              | -2.276783 | 0.007158  |
|    | 35            | 1             | 0           | -8.970049               | -4.385071 | -0.405549 |
| 45 | 36            | 6             | 0           | -4.845405               | -1.983820 | -0.579917 |
|    | 37            | 7             | 0           | -4.719821               | -0.617632 | -0.487079 |
|    | 38            | 7             | 0           | -3.863570               | -2.868299 | -0.750574 |
|    | 39            | 6             | 0           | -2.586158               | -2.559412 | -0.975421 |
|    | 40            | 7             | 0           | -2.072871               | -1.291031 | -1.107473 |
| 50 | 41            | 7             | 0           | 0.090787                | -0.375999 | -1.719721 |
|    | 42            | 6             | 0           | -0.755106               | -1.370213 | -1.449955 |
|    | 43            | 6             | 0           | -1.509831               | -3.541157 | -1.206019 |
|    | 44            | 6             | 0           | 0.932820                | -4.736337 | -1.900127 |

|    |    |    |   |            |           |           |
|----|----|----|---|------------|-----------|-----------|
|    | 45 | 6  | 0 | -0.365928  | -2.773057 | -1.531014 |
|    | 46 | 6  | 0 | -1.406818  | -4.948348 | -1.179063 |
|    | 47 | 6  | 0 | -0.175475  | -5.513952 | -1.545077 |
|    | 48 | 6  | 0 | 0.853709   | -3.347662 | -1.878929 |
| 5  | 49 | 1  | 0 | -0.083322  | -6.594757 | -1.519610 |
|    | 50 | 1  | 0 | 1.867176   | -5.225359 | -2.158116 |
|    | 51 | 30 | 0 | -2.980124  | 0.423610  | -0.534231 |
|    | 52 | 6  | 0 | -7.479035  | -6.281795 | -1.026301 |
|    | 53 | 1  | 0 | -7.987132  | -6.411130 | -0.067493 |
| 10 | 54 | 1  | 0 | -6.989222  | -7.221006 | -1.292310 |
|    | 55 | 1  | 0 | -8.203048  | -6.031530 | -1.805467 |
|    | 56 | 6  | 0 | -9.790469  | 4.616374  | 0.343239  |
|    | 57 | 1  | 0 | -9.536699  | 5.331617  | 1.129219  |
|    | 58 | 1  | 0 | -10.693849 | 4.077969  | 0.637654  |
| 15 | 59 | 1  | 0 | -9.985978  | 5.140931  | -0.594995 |
|    | 60 | 1  | 0 | 1.709416   | -2.726586 | -2.114383 |
|    | 61 | 1  | 0 | -0.184755  | 5.323617  | -2.242145 |
|    | 62 | 6  | 0 | -3.127021  | -5.573536 | 0.961221  |
|    | 63 | 1  | 0 | -3.814353  | -6.331798 | 1.342207  |
| 20 | 64 | 1  | 0 | -3.628539  | -4.606806 | 0.948397  |
|    | 65 | 1  | 0 | -2.231343  | -5.546573 | 1.583450  |
|    | 66 | 6  | 0 | 2.618779   | -0.408781 | -3.704647 |
|    | 67 | 1  | 0 | 1.617891   | -0.748347 | -3.444686 |
|    | 68 | 1  | 0 | 3.317093   | -1.248887 | -3.715306 |
| 25 | 69 | 1  | 0 | 2.634543   | 0.084409  | -4.678029 |
|    | 70 | 6  | 0 | 8.715286   | -1.545020 | -1.044525 |
|    | 71 | 6  | 0 | 7.258536   | -3.966773 | -0.521343 |
|    | 72 | 6  | 0 | 9.299397   | -2.797042 | -1.219223 |
|    | 73 | 6  | 0 | 7.392065   | -1.519653 | -0.612849 |
| 30 | 74 | 6  | 0 | 6.665425   | -2.700123 | -0.352059 |
|    | 75 | 6  | 0 | 8.590658   | -3.981478 | -0.964740 |
|    | 76 | 1  | 0 | 10.328410  | -2.871174 | -1.559095 |
|    | 77 | 1  | 0 | 9.101346   | -4.923961 | -1.117966 |
|    | 78 | 6  | 0 | 6.492858   | -0.403651 | -0.319277 |
| 35 | 79 | 6  | 0 | 5.342953   | -2.267477 | 0.093443  |
|    | 80 | 7  | 0 | 5.280789   | -0.897643 | 0.073372  |
|    | 81 | 7  | 0 | 6.871364   | 0.869014  | -0.388502 |
|    | 82 | 6  | 0 | 6.085444   | 1.888034  | -0.049309 |
|    | 83 | 6  | 0 | 6.548038   | 3.275449  | -0.033356 |
| 40 | 84 | 6  | 0 | 5.459118   | 4.055734  | 0.407357  |
|    | 85 | 6  | 0 | 7.781468   | 3.837012  | -0.351756 |
|    | 86 | 1  | 0 | 8.605113   | 3.216158  | -0.685932 |
|    | 87 | 6  | 0 | 7.899848   | 5.218192  | -0.220060 |
|    | 88 | 1  | 0 | 8.840839   | 5.705847  | -0.458074 |
| 45 | 89 | 6  | 0 | 6.826684   | 6.009817  | 0.217944  |
|    | 90 | 1  | 0 | 6.982588   | 7.078242  | 0.300517  |
|    | 91 | 6  | 0 | 5.580238   | 5.452651  | 0.545674  |
|    | 92 | 6  | 0 | 4.362737   | 3.118997  | 0.641985  |
|    | 93 | 7  | 0 | 4.781668   | 1.843956  | 0.354573  |
| 50 | 94 | 7  | 0 | 3.161391   | 3.488400  | 1.067911  |
|    | 95 | 6  | 0 | 2.162806   | 2.642713  | 1.313497  |
|    | 96 | 6  | 0 | 0.840607   | 3.085161  | 1.737453  |
|    | 97 | 6  | 0 | -1.819483  | 3.328574  | 2.422569  |
|    | 98 | 6  | 0 | 0.050806   | 1.922585  | 1.878178  |

|    |     |    |   |           |           |           |
|----|-----|----|---|-----------|-----------|-----------|
|    | 99  | 6  | 0 | 0.337484  | 4.363731  | 1.967931  |
|    | 100 | 6  | 0 | -1.001060 | 4.466522  | 2.328395  |
|    | 101 | 6  | 0 | -1.318144 | 2.043020  | 2.188220  |
|    | 102 | 1  | 0 | 0.975793  | 5.233387  | 1.858806  |
| 5  | 103 | 1  | 0 | -1.441021 | 5.440769  | 2.518526  |
|    | 104 | 1  | 0 | -2.865491 | 3.469899  | 2.664000  |
|    | 105 | 6  | 0 | 0.948269  | 0.793053  | 1.610431  |
|    | 106 | 7  | 0 | 2.173973  | 1.280106  | 1.231224  |
|    | 107 | 7  | 0 | 0.628660  | -0.481755 | 1.829581  |
| 10 | 108 | 6  | 0 | 1.450037  | -1.513642 | 1.640126  |
|    | 109 | 7  | 0 | 2.680492  | -1.465111 | 1.026731  |
|    | 110 | 7  | 0 | 4.399405  | -3.100546 | 0.512548  |
|    | 111 | 6  | 0 | 3.215756  | -2.718774 | 0.991960  |
|    | 112 | 6  | 0 | 1.181209  | -2.897911 | 2.067650  |
| 15 | 113 | 6  | 0 | 1.380531  | -5.664355 | 2.501581  |
|    | 114 | 6  | 0 | 2.295375  | -3.650415 | 1.626416  |
|    | 115 | 6  | 0 | 0.160204  | -3.548336 | 2.792337  |
|    | 116 | 6  | 0 | 0.286844  | -4.932476 | 2.985865  |
|    | 117 | 6  | 0 | 2.413362  | -5.023361 | 1.826539  |
| 20 | 118 | 1  | 0 | -0.485532 | -5.440967 | 3.553919  |
|    | 119 | 1  | 0 | 1.425557  | -6.733920 | 2.683585  |
|    | 120 | 30 | 0 | 3.590493  | 0.188070  | 0.293650  |
|    | 121 | 6  | 0 | -3.948457 | 1.198692  | 2.806855  |
|    | 122 | 1  | 0 | -3.830164 | 1.608500  | 3.811677  |
| 25 | 123 | 1  | 0 | -4.597461 | 0.322312  | 2.853226  |
|    | 124 | 1  | 0 | -4.399420 | 1.936945  | 2.142709  |
|    | 125 | 6  | 0 | 4.861591  | 8.102768  | 1.153220  |
|    | 126 | 1  | 0 | 5.696653  | 8.191697  | 1.852091  |
|    | 127 | 1  | 0 | 4.038884  | 8.726179  | 1.509939  |
| 30 | 128 | 1  | 0 | 5.161269  | 8.451998  | 0.162204  |
|    | 129 | 1  | 0 | 3.289001  | -5.553539 | 1.467998  |
|    | 130 | 1  | 0 | 9.255991  | -0.624493 | -1.233668 |
|    | 131 | 6  | 0 | -0.606861 | -1.581016 | 4.657547  |
|    | 132 | 1  | 0 | -1.458338 | -1.176413 | 5.209383  |
| 35 | 133 | 1  | 0 | -0.098001 | -0.774397 | 4.130870  |
|    | 134 | 1  | 0 | 0.066051  | -2.084068 | 5.354751  |
|    | 135 | 6  | 0 | 7.498810  | -6.768833 | -0.566179 |
|    | 136 | 1  | 0 | 7.802663  | -6.754866 | -1.615567 |
|    | 137 | 1  | 0 | 6.956594  | -7.696373 | -0.370430 |
| 40 | 138 | 1  | 0 | 8.377848  | -6.733894 | 0.081627  |
|    | 139 | 16 | 0 | -8.511798 | 3.327884  | 0.152652  |
|    | 140 | 16 | 0 | -6.126581 | -5.060186 | -0.933069 |
|    | 141 | 16 | 0 | -2.698649 | -6.099962 | -0.738778 |
|    | 142 | 16 | 0 | -1.308782 | -2.780233 | 3.465590  |
| 45 | 143 | 16 | 0 | -2.349570 | 0.578801  | 2.179774  |
|    | 144 | 16 | 0 | 3.238503  | 0.748333  | -2.430399 |
|    | 145 | 16 | 0 | 6.313834  | -5.435564 | -0.178637 |
|    | 146 | 16 | 0 | 4.187746  | 6.406822  | 1.109636  |

50

### Na-Protonated 8a

Standard orientation:



| Center<br>Number | Atomic<br>Number | Atomic<br>Type | Coordinates (Angstroms) |           |           |           |
|------------------|------------------|----------------|-------------------------|-----------|-----------|-----------|
|                  |                  |                | X                       | Y         | Z         |           |
|                  | 1                | 6              | 0                       | -1.638313 | -5.323699 | 0.000139  |
| 5                | 2                | 6              | 0                       | 1.218388  | -5.446373 | 0.000110  |
|                  | 3                | 6              | 0                       | -0.974676 | -6.551882 | 0.000259  |
|                  | 4                | 6              | 0                       | -0.855916 | -4.159077 | -0.000002 |
|                  | 5                | 6              | 0                       | 0.554384  | -4.220226 | -0.000017 |
|                  | 6                | 6              | 0                       | 0.433176  | -6.598116 | 0.000242  |
| 10               | 7                | 1              | 0                       | -1.531385 | -7.480844 | 0.000369  |
|                  | 8                | 1              | 0                       | 0.913010  | -7.571624 | 0.000338  |
|                  | 9                | 1              | 0                       | 2.301146  | -5.490742 | 0.000103  |
|                  | 10               | 6              | 0                       | -1.183465 | -2.761291 | -0.000133 |
|                  | 11               | 6              | 0                       | 1.027726  | -2.839409 | -0.000159 |
| 15               | 12               | 7              | 0                       | -0.070080 | -1.996891 | -0.000215 |
|                  | 13               | 7              | 0                       | -2.445567 | -2.256835 | -0.000092 |
|                  | 14               | 6              | 0                       | -2.853586 | -0.960930 | -0.000098 |
|                  | 15               | 6              | 0                       | -4.230769 | -0.516878 | 0.000051  |
|                  | 16               | 6              | 0                       | -4.155344 | 0.896864  | 0.000060  |
| 20               | 17               | 6              | 0                       | -5.449336 | -1.199843 | 0.000185  |
|                  | 18               | 1              | 0                       | -5.510288 | -2.283737 | 0.000182  |
|                  | 19               | 6              | 0                       | -6.607326 | -0.427106 | 0.000320  |
|                  | 20               | 1              | 0                       | -7.576939 | -0.914625 | 0.000420  |
|                  | 21               | 6              | 0                       | -6.561888 | 0.974301  | 0.000328  |
| 25               | 22               | 1              | 0                       | -7.494387 | 1.524228  | 0.000431  |
|                  | 23               | 6              | 0                       | -5.339049 | 1.665163  | 0.000204  |
|                  | 24               | 6              | 0                       | -2.744415 | 1.248970  | -0.000073 |
|                  | 25               | 7              | 0                       | -1.997582 | 0.079916  | -0.000163 |
|                  | 26               | 7              | 0                       | -2.269706 | 2.488146  | -0.000032 |
| 30               | 27               | 6              | 0                       | -0.984650 | 2.815738  | -0.000056 |
|                  | 28               | 6              | 0                       | -0.514578 | 4.199653  | 0.000127  |
|                  | 29               | 6              | 0                       | 0.940702  | 6.546323  | 0.000452  |
|                  | 30               | 6              | 0                       | 0.894328  | 4.143079  | 0.000110  |
|                  | 31               | 6              | 0                       | -1.217006 | 5.399316  | 0.000309  |
| 35               | 32               | 6              | 0                       | -0.459625 | 6.571753  | 0.000467  |
|                  | 33               | 6              | 0                       | 1.650175  | 5.331168  | 0.000278  |
|                  | 34               | 1              | 0                       | -2.300562 | 5.410440  | 0.000324  |
|                  | 35               | 1              | 0                       | -0.959389 | 7.535507  | 0.000605  |
|                  | 36               | 1              | 0                       | 1.478538  | 7.486095  | 0.000578  |
| 40               | 37               | 6              | 0                       | 1.253269  | 2.728987  | -0.000078 |
|                  | 38               | 7              | 0                       | 0.099293  | 1.976181  | -0.000166 |
|                  | 39               | 7              | 0                       | 2.499535  | 2.267554  | -0.000080 |
|                  | 40               | 6              | 0                       | 2.831897  | 0.980607  | -0.000130 |
|                  | 41               | 7              | 0                       | 2.004050  | -0.107249 | -0.000208 |
| 45               | 42               | 7              | 0                       | 2.309585  | -2.502853 | -0.000157 |
|                  | 43               | 6              | 0                       | 2.768939  | -1.256704 | -0.000174 |
|                  | 44               | 6              | 0                       | 4.221450  | 0.521983  | -0.000024 |
|                  | 45               | 6              | 0                       | 6.581938  | -0.910721 | 0.000161  |
|                  | 46               | 6              | 0                       | 4.178335  | -0.887653 | -0.000058 |
| 50               | 47               | 6              | 0                       | 5.413655  | 1.235882  | 0.000107  |
|                  | 48               | 6              | 0                       | 6.593784  | 0.489925  | 0.000194  |
|                  | 49               | 6              | 0                       | 5.374064  | -1.631550 | 0.000039  |
|                  | 50               | 1              | 0                       | 5.413196  | 2.319500  | 0.000137  |
|                  | 51               | 1              | 0                       | 7.552575  | 0.999086  | 0.000291  |

|    |    |    |   |           |           |           |
|----|----|----|---|-----------|-----------|-----------|
|    | 52 | 1  | 0 | 7.527002  | -1.439255 | 0.000232  |
|    | 53 | 30 | 0 | 0.022749  | 0.005047  | -0.001011 |
|    | 54 | 8  | 0 | 2.993380  | 5.228633  | 0.000255  |
|    | 55 | 8  | 0 | 5.283344  | -2.976521 | 0.000002  |
| 5  | 56 | 8  | 0 | -2.990107 | -5.136213 | 0.000149  |
|    | 57 | 8  | 0 | -5.216104 | 3.004063  | 0.000201  |
|    | 58 | 6  | 0 | 6.486110  | -3.745081 | 0.000089  |
|    | 59 | 1  | 0 | 7.085762  | -3.547541 | -0.895486 |
|    | 60 | 1  | 0 | 6.168413  | -4.787456 | 0.000036  |
| 10 | 61 | 1  | 0 | 7.085605  | -3.547584 | 0.895780  |
|    | 62 | 6  | 0 | 3.773976  | 6.423835  | 0.000414  |
|    | 63 | 1  | 0 | 3.582375  | 7.025246  | -0.895247 |
|    | 64 | 1  | 0 | 4.812906  | 6.095322  | 0.000360  |
|    | 65 | 1  | 0 | 3.582391  | 7.024999  | 0.896245  |
| 15 | 66 | 6  | 0 | -6.399036 | 3.805296  | 0.000399  |
|    | 67 | 1  | 0 | -7.002409 | 3.623077  | -0.895675 |
|    | 68 | 1  | 0 | -6.052254 | 4.838021  | 0.000417  |
|    | 69 | 1  | 0 | -7.002183 | 3.622969  | 0.896604  |
|    | 70 | 6  | 0 | -3.837340 | -6.292658 | 0.000216  |
| 20 | 71 | 1  | 0 | -3.669633 | -6.897909 | -0.896186 |
|    | 72 | 1  | 0 | -4.859538 | -5.915629 | 0.000144  |
|    | 73 | 1  | 0 | -3.669702 | -6.897754 | 0.896735  |
|    | 74 | 1  | 0 | -3.167367 | -2.974554 | -0.000015 |

25

### Na-Protonated 8b

Standard orientation:

| Center<br>Number | Atomic<br>Number | Atomic<br>Type | Coordinates (Angstroms) |          |           |           |
|------------------|------------------|----------------|-------------------------|----------|-----------|-----------|
|                  |                  |                | X                       | Y        | Z         |           |
|                  | 1                | 6              | 0                       | 4.855170 | 2.720986  | -0.057257 |
|                  | 2                | 6              | 0                       | 2.864264 | 4.771819  | -0.106058 |
|                  | 3                | 6              | 0                       | 5.213193 | 4.071270  | -0.098712 |
| 35               | 4                | 6              | 0                       | 3.486654 | 2.407036  | -0.038619 |
|                  | 5                | 6              | 0                       | 2.508298 | 3.425201  | -0.063693 |
|                  | 6                | 6              | 0                       | 4.225094 | 5.072132  | -0.122216 |
|                  | 7                | 1              | 0                       | 6.255584 | 4.364069  | -0.113354 |
|                  | 8                | 1              | 0                       | 4.544400 | 6.108870  | -0.154396 |
| 40               | 9                | 1              | 0                       | 2.107782 | 5.547340  | -0.125412 |
|                  | 10               | 6              | 0                       | 2.756209 | 1.167269  | 0.000664  |
|                  | 11               | 6              | 0                       | 1.213983 | 2.754658  | -0.037172 |
|                  | 12               | 7              | 0                       | 1.420401 | 1.389083  | 0.001132  |
|                  | 13               | 7              | 0                       | 3.307855 | -0.074146 | 0.026490  |
| 45               | 14               | 6              | 0                       | 2.686195 | -1.283853 | 0.042463  |
|                  | 15               | 6              | 0                       | 3.344655 | -2.563101 | 0.051271  |
|                  | 16               | 6              | 0                       | 2.309660 | -3.524624 | 0.044137  |
|                  | 17               | 6              | 0                       | 4.693206 | -2.954881 | 0.062185  |
|                  | 18               | 6              | 0                       | 4.974326 | -4.323421 | 0.064942  |
| 50               | 19               | 1              | 0                       | 5.998395 | -4.675249 | 0.073418  |
|                  | 20               | 6              | 0                       | 3.930812 | -5.267255 | 0.056406  |
|                  | 21               | 1              | 0                       | 4.191055 | -6.320874 | 0.058461  |
|                  | 22               | 6              | 0                       | 2.589640 | -4.890377 | 0.045739  |

|    |    |    |   |           |           |           |
|----|----|----|---|-----------|-----------|-----------|
|    | 23 | 6  | 0 | 1.056738  | -2.781217 | 0.032953  |
|    | 24 | 7  | 0 | 1.340467  | -1.428888 | 0.035983  |
|    | 25 | 7  | 0 | -0.138979 | -3.354956 | 0.008662  |
|    | 26 | 6  | 0 | -1.293629 | -2.701175 | -0.008380 |
| 5  | 27 | 6  | 0 | -2.590957 | -3.366462 | -0.073682 |
|    | 28 | 6  | 0 | -5.263248 | -4.038791 | -0.235157 |
|    | 29 | 6  | 0 | -3.562536 | -2.343598 | -0.084643 |
|    | 30 | 6  | 0 | -2.919594 | -4.716258 | -0.134330 |
|    | 31 | 6  | 0 | -4.276352 | -5.031958 | -0.212328 |
| 10 | 32 | 6  | 0 | -4.929001 | -2.674005 | -0.174422 |
|    | 33 | 1  | 0 | -2.151387 | -5.480355 | -0.124107 |
|    | 34 | 1  | 0 | -4.585723 | -6.071345 | -0.260491 |
|    | 35 | 1  | 0 | -6.301611 | -4.338332 | -0.301354 |
|    | 36 | 6  | 0 | -2.835201 | -1.078653 | -0.014195 |
| 15 | 37 | 7  | 0 | -1.484994 | -1.343655 | 0.020075  |
|    | 38 | 7  | 0 | -3.412084 | 0.120958  | 0.016034  |
|    | 39 | 6  | 0 | -2.772969 | 1.285483  | 0.041712  |
|    | 40 | 7  | 0 | -1.407980 | 1.470747  | 0.028841  |
|    | 41 | 7  | 0 | 0.054516  | 3.396524  | -0.053365 |
| 20 | 42 | 6  | 0 | -1.138171 | 2.812006  | -0.023042 |
|    | 43 | 6  | 0 | -3.433698 | 2.595437  | 0.024451  |
|    | 44 | 6  | 0 | -3.953526 | 5.336123  | -0.247858 |
|    | 45 | 6  | 0 | -2.392499 | 3.553389  | -0.054103 |
|    | 46 | 6  | 0 | -4.771793 | 3.036345  | 0.005777  |
| 25 | 47 | 6  | 0 | -4.998331 | 4.415699  | -0.151721 |
|    | 48 | 6  | 0 | -2.622132 | 4.916743  | -0.183853 |
|    | 49 | 1  | 0 | -6.031101 | 4.746185  | -0.179161 |
|    | 50 | 1  | 0 | -4.185352 | 6.390700  | -0.358133 |
|    | 51 | 30 | 0 | -0.054604 | 0.022899  | 0.087741  |
| 30 | 52 | 8  | 0 | -5.825333 | -1.668014 | -0.200056 |
|    | 53 | 8  | 0 | 5.717219  | 1.667990  | -0.032754 |
|    | 54 | 6  | 0 | -7.209164 | -1.979062 | -0.369378 |
|    | 55 | 1  | 0 | -7.720887 | -1.018255 | -0.412367 |
|    | 56 | 1  | 0 | -7.593453 | -2.562318 | 0.474956  |
| 35 | 57 | 1  | 0 | -7.380990 | -2.524461 | -1.303608 |
|    | 58 | 6  | 0 | 7.121211  | 1.944967  | -0.060161 |
|    | 59 | 1  | 0 | 7.423295  | 2.526535  | 0.816780  |
|    | 60 | 1  | 0 | 7.397645  | 2.478448  | -0.975279 |
|    | 61 | 1  | 0 | 7.617761  | 0.975868  | -0.041685 |
| 40 | 62 | 1  | 0 | -1.795441 | 5.614912  | -0.246894 |
|    | 63 | 1  | 0 | 1.790720  | -5.622374 | 0.039065  |
|    | 64 | 8  | 0 | -5.876357 | 2.255964  | 0.093942  |
|    | 65 | 8  | 0 | 5.613540  | -1.951765 | 0.070586  |
|    | 66 | 6  | 0 | 6.999177  | -2.308854 | 0.094416  |
| 45 | 67 | 1  | 0 | 7.239381  | -2.886719 | 0.992661  |
|    | 68 | 1  | 0 | 7.550324  | -1.369649 | 0.109870  |
|    | 69 | 1  | 0 | 7.272846  | -2.878213 | -0.799733 |
|    | 70 | 6  | 0 | -6.014289 | 1.401349  | 1.243110  |
|    | 71 | 1  | 0 | -7.072025 | 1.134973  | 1.280374  |
| 50 | 72 | 1  | 0 | -5.752511 | 1.946986  | 2.156608  |
|    | 73 | 1  | 0 | -5.404723 | 0.504243  | 1.138760  |
|    | 74 | 1  | 0 | 4.328799  | -0.103190 | 0.026612  |

---

### Na-Protonated 8c

Standard orientation:

| Center<br>Number | Atomic<br>Number | Atomic<br>Type | Coordinates (Angstroms) |           |           |
|------------------|------------------|----------------|-------------------------|-----------|-----------|
|                  |                  |                | X                       | Y         | Z         |
| 1                | 6                | 0              | 2.739356                | -5.221217 | 0.000772  |
| 2                | 6                | 0              | 4.818155                | -3.246285 | 0.000436  |
| 3                | 6                | 0              | 4.087800                | -5.581555 | 0.001090  |
| 4                | 6                | 0              | 2.453149                | -3.860841 | 0.000251  |
| 5                | 6                | 0              | 3.460094                | -2.872930 | 0.000081  |
| 6                | 6                | 0              | 5.108504                | -4.622355 | 0.000927  |
| 7                | 1                | 0              | 4.364010                | -6.631376 | 0.001475  |
| 8                | 1                | 0              | 6.137749                | -4.958754 | 0.001198  |
| 9                | 6                | 0              | 1.175217                | -3.149317 | -0.000170 |
| 10               | 6                | 0              | 2.776771                | -1.586595 | -0.000394 |
| 11               | 7                | 0              | 1.413367                | -1.802479 | -0.000548 |
| 12               | 7                | 0              | -0.001217               | -3.768632 | 0.000005  |
| 13               | 6                | 0              | -1.177237               | -3.148531 | -0.000020 |
| 14               | 6                | 0              | -2.455616               | -3.859250 | 0.000285  |
| 15               | 6                | 0              | -3.461943               | -2.870717 | 0.000258  |
| 16               | 6                | 0              | -2.742635               | -5.219450 | 0.000584  |
| 17               | 1                | 0              | -1.950612               | -5.958902 | 0.000611  |
| 18               | 6                | 0              | -4.091301               | -5.578969 | 0.000842  |
| 19               | 1                | 0              | -4.368160               | -6.628619 | 0.001064  |
| 20               | 6                | 0              | -5.111412               | -4.619142 | 0.000823  |
| 21               | 1                | 0              | -6.140865               | -4.954909 | 0.001031  |
| 22               | 6                | 0              | -4.820231               | -3.243246 | 0.000546  |
| 23               | 6                | 0              | -2.777796               | -1.584815 | -0.000047 |
| 24               | 7                | 0              | -1.414541               | -1.801521 | -0.000123 |
| 25               | 7                | 0              | -3.383504               | -0.403160 | -0.000032 |
| 26               | 6                | 0              | -2.768693               | 0.770393  | -0.000183 |
| 27               | 6                | 0              | -3.475913               | 2.045300  | 0.000134  |
| 28               | 6                | 0              | -4.203757               | 4.729019  | 0.000629  |
| 29               | 6                | 0              | -2.487187               | 3.053687  | 0.000016  |
| 30               | 6                | 0              | -4.833593               | 2.359890  | 0.000525  |
| 31               | 6                | 0              | -5.174974               | 3.710762  | 0.000757  |
| 32               | 6                | 0              | -2.842900               | 4.412019  | 0.000265  |
| 33               | 1                | 0              | -5.582692               | 1.576907  | 0.000632  |
| 34               | 1                | 0              | -6.221225               | 3.999453  | 0.001045  |
| 35               | 1                | 0              | -4.528303               | 5.762133  | 0.000824  |
| 36               | 6                | 0              | -1.225885               | 2.359769  | -0.000368 |
| 37               | 7                | 0              | -1.408488               | 1.019401  | -0.000455 |
| 38               | 7                | 0              | 0.000915                | 2.947006  | -0.000366 |
| 39               | 6                | 0              | 1.227369                | 2.359036  | -0.000418 |
| 40               | 7                | 0              | 1.409133                | 1.018565  | -0.000682 |
| 41               | 7                | 0              | 3.383206                | -0.405306 | -0.000387 |
| 42               | 6                | 0              | 2.769171                | 0.768670  | -0.000432 |
| 43               | 6                | 0              | 2.489112                | 3.052142  | 0.000051  |
| 44               | 6                | 0              | 5.177316                | 3.707525  | 0.001012  |
| 45               | 6                | 0              | 3.477205                | 2.043123  | 0.000046  |
| 46               | 6                | 0              | 2.845692                | 4.410245  | 0.000548  |
| 47               | 6                | 0              | 4.206741                | 4.726399  | 0.001025  |
| 48               | 6                | 0              | 4.835087                | 2.356874  | 0.000540  |

|    |    |    |   |           |           |           |
|----|----|----|---|-----------|-----------|-----------|
|    | 49 | 1  | 0 | 4.531945  | 5.759307  | 0.001418  |
|    | 50 | 1  | 0 | 6.223750  | 3.995551  | 0.001394  |
|    | 51 | 30 | 0 | -0.000064 | -0.414715 | -0.003040 |
|    | 52 | 8  | 0 | -1.815582 | 5.305762  | 0.000114  |
| 5  | 53 | 8  | 0 | -5.745950 | -2.263360 | 0.000517  |
|    | 54 | 6  | 0 | -2.135307 | 6.700317  | 0.000201  |
|    | 55 | 1  | 0 | -2.702095 | 6.972940  | -0.895956 |
|    | 56 | 1  | 0 | -1.181501 | 7.226201  | -0.000083 |
|    | 57 | 1  | 0 | -2.701579 | 6.972952  | 0.896682  |
| 10 | 58 | 6  | 0 | -7.126755 | -2.624770 | 0.000813  |
|    | 59 | 1  | 0 | -7.388861 | -3.199333 | -0.894669 |
|    | 60 | 1  | 0 | -7.676577 | -1.683938 | 0.000739  |
|    | 61 | 1  | 0 | -7.388558 | -3.199016 | 0.896587  |
|    | 62 | 1  | 0 | 5.583702  | 1.573427  | 0.000554  |
| 15 | 63 | 1  | 0 | 1.946892  | -5.960198 | 0.000909  |
|    | 64 | 8  | 0 | 1.818936  | 5.304642  | 0.000515  |
|    | 65 | 6  | 0 | 2.139558  | 6.698986  | 0.000982  |
|    | 66 | 1  | 0 | 1.186093  | 7.225486  | 0.000830  |
|    | 67 | 1  | 0 | 2.706543  | 6.971488  | -0.895088 |
| 20 | 68 | 1  | 0 | 2.705992  | 6.971016  | 0.897544  |
|    | 69 | 8  | 0 | 5.744464  | -2.266950 | 0.000277  |
|    | 70 | 6  | 0 | 7.125051  | -2.629196 | 0.000525  |
|    | 71 | 1  | 0 | 7.386580  | -3.203442 | 0.896380  |
|    | 72 | 1  | 0 | 7.675441  | -1.688698 | 0.000231  |
| 25 | 73 | 1  | 0 | 7.386731  | -3.204089 | -0.894870 |
|    | 74 | 1  | 0 | 0.001212  | 3.968119  | -0.000151 |

### Na-Protonated 8d

Standard orientation:

| Center Number | Atomic Number | Atomic Type | Coordinates (Angstroms) |           |           |           |
|---------------|---------------|-------------|-------------------------|-----------|-----------|-----------|
|               |               |             | X                       | Y         | Z         |           |
| 35            | 1             | 6           | 0                       | -4.571286 | 2.709748  | 0.001712  |
|               | 2             | 6           | 0                       | -2.490811 | 4.670682  | 0.001415  |
|               | 3             | 6           | 0                       | -4.868655 | 4.075207  | 0.003105  |
|               | 4             | 6           | 0                       | -3.218317 | 2.334500  | 0.000006  |
|               | 5             | 6           | 0                       | -2.196029 | 3.308700  | -0.000114 |
| 40            | 6             | 6           | 0                       | -3.836702 | 5.031601  | 0.002943  |
|               | 7             | 1           | 0                       | -5.896991 | 4.414561  | 0.004344  |
|               | 8             | 1           | 0                       | -4.110244 | 6.081914  | 0.004075  |
|               | 9             | 1           | 0                       | -1.697009 | 5.408315  | 0.001394  |
|               | 10            | 6           | 0                       | -2.542052 | 1.063378  | -0.001575 |
| 45            | 11            | 6           | 0                       | -0.930878 | 2.583517  | -0.001752 |
|               | 12            | 7           | 0                       | -1.198849 | 1.227366  | -0.002482 |
|               | 13            | 7           | 0                       | -3.145192 | -0.154790 | -0.001256 |
|               | 14            | 6           | 0                       | -2.575063 | -1.390114 | -0.001354 |
|               | 15            | 6           | 0                       | -3.287297 | -2.640495 | 0.000568  |
| 50            | 16            | 6           | 0                       | -2.294185 | -3.645305 | 0.000856  |
|               | 17            | 6           | 0                       | -4.651372 | -2.974538 | 0.002115  |
|               | 18            | 6           | 0                       | -4.990715 | -4.329665 | 0.003908  |
|               | 19            | 1           | 0                       | -6.028936 | -4.637386 | 0.005083  |

|    |    |    |   |           |           |           |
|----|----|----|---|-----------|-----------|-----------|
|    | 20 | 6  | 0 | -3.988288 | -5.317274 | 0.004222  |
|    | 21 | 1  | 0 | -4.293299 | -6.358831 | 0.005647  |
|    | 22 | 6  | 0 | -2.632317 | -4.997841 | 0.002766  |
|    | 23 | 6  | 0 | -1.010112 | -2.956572 | -0.000953 |
| 5  | 24 | 7  | 0 | -1.236924 | -1.593207 | -0.002177 |
|    | 25 | 7  | 0 | 0.160210  | -3.581593 | -0.000542 |
|    | 26 | 6  | 0 | 1.342374  | -2.977575 | -0.000964 |
|    | 27 | 6  | 0 | 2.614103  | -3.696832 | 0.000813  |
|    | 28 | 6  | 0 | 5.265718  | -4.471667 | 0.003987  |
| 10 | 29 | 6  | 0 | 3.625987  | -2.714036 | 0.000595  |
|    | 30 | 6  | 0 | 2.893888  | -5.059063 | 0.002668  |
|    | 31 | 6  | 0 | 4.240395  | -5.425696 | 0.004185  |
|    | 32 | 6  | 0 | 4.982167  | -3.093645 | 0.002258  |
|    | 33 | 1  | 0 | 2.098458  | -5.794908 | 0.002875  |
| 15 | 34 | 1  | 0 | 4.511512  | -6.476876 | 0.005562  |
|    | 35 | 1  | 0 | 6.293328  | -4.812942 | 0.005207  |
|    | 36 | 6  | 0 | 2.950195  | -1.421496 | -0.001268 |
|    | 37 | 7  | 0 | 1.588611  | -1.629218 | -0.002062 |
|    | 38 | 7  | 0 | 3.571375  | -0.245969 | -0.001139 |
| 20 | 39 | 6  | 0 | 2.961924  | 0.933862  | -0.001509 |
|    | 40 | 7  | 0 | 1.618491  | 1.194133  | -0.002794 |
|    | 41 | 7  | 0 | 0.250735  | 3.183187  | -0.001571 |
|    | 42 | 6  | 0 | 1.423543  | 2.559797  | -0.001776 |
|    | 43 | 6  | 0 | 3.691739  | 2.202019  | 0.000496  |
| 25 | 44 | 6  | 0 | 4.496320  | 4.843386  | 0.004073  |
|    | 45 | 6  | 0 | 2.720091  | 3.224144  | 0.000267  |
|    | 46 | 6  | 0 | 5.056436  | 2.464524  | 0.002550  |
|    | 47 | 6  | 0 | 5.438778  | 3.807105  | 0.004263  |
|    | 48 | 6  | 0 | 3.115413  | 4.575785  | 0.002156  |
| 30 | 49 | 1  | 0 | 5.778441  | 1.656490  | 0.002769  |
|    | 50 | 1  | 0 | 6.492867  | 4.066771  | 0.005795  |
|    | 51 | 1  | 0 | 4.849397  | 5.867032  | 0.005446  |
|    | 52 | 30 | 0 | 0.215757  | -0.201435 | -0.012894 |
|    | 53 | 8  | 0 | 5.913326  | -2.120167 | 0.001993  |
| 35 | 54 | 8  | 0 | 2.151423  | 5.518184  | 0.001914  |
|    | 55 | 8  | 0 | -5.479998 | 1.695819  | 0.001799  |
|    | 56 | 6  | 0 | 2.536417  | 6.892530  | 0.003793  |
|    | 57 | 1  | 0 | 3.116381  | 7.145517  | -0.890844 |
|    | 58 | 1  | 0 | 3.114228  | 7.143667  | 0.900340  |
| 40 | 59 | 1  | 0 | 1.605192  | 7.458470  | 0.003253  |
|    | 60 | 6  | 0 | 7.292424  | -2.488517 | 0.003668  |
|    | 61 | 1  | 0 | 7.552167  | -3.065121 | -0.891181 |
|    | 62 | 1  | 0 | 7.550516  | -3.063136 | 0.900268  |
|    | 63 | 1  | 0 | 7.846471  | -1.550260 | 0.003133  |
| 45 | 64 | 6  | 0 | -6.869655 | 2.036370  | 0.003672  |
|    | 65 | 1  | 0 | -7.132672 | 2.606186  | 0.900768  |
|    | 66 | 1  | 0 | -7.409864 | 1.090641  | 0.003507  |
|    | 67 | 1  | 0 | -7.134726 | 2.607682  | -0.891865 |
|    | 68 | 1  | 0 | -1.865114 | -5.763040 | 0.003058  |
| 50 | 69 | 8  | 0 | -5.528125 | -1.932614 | 0.001623  |
|    | 70 | 6  | 0 | -6.927774 | -2.229610 | 0.002932  |
|    | 71 | 1  | 0 | -7.438002 | -1.267373 | 0.002014  |
|    | 72 | 1  | 0 | -7.208977 | -2.790438 | 0.900173  |
|    | 73 | 1  | 0 | -7.210149 | -2.792736 | -0.892498 |

74 1 0 -4.166303 -0.141747 -0.000333

---

### 5 Na-Protonated 9a

Standard orientation:

---

| Center Number | Atomic Number | Atomic Type | Coordinates (Angstroms) |           |           |           |
|---------------|---------------|-------------|-------------------------|-----------|-----------|-----------|
|               |               |             | X                       | Y         | Z         |           |
| 10            | 1             | 6           | 0                       | -5.576878 | -0.394618 | -0.078785 |
|               | 2             | 6           | 0                       | -4.634533 | -3.118973 | -0.137009 |
|               | 3             | 6           | 0                       | -6.455311 | -1.493266 | -0.108364 |
|               | 4             | 6           | 0                       | -4.197849 | -0.697706 | -0.078891 |
| 15            | 5             | 6           | 0                       | -3.749222 | -2.042225 | -0.106642 |
|               | 6             | 6           | 0                       | -5.994728 | -2.815476 | -0.137339 |
|               | 7             | 1           | 0                       | -7.524991 | -1.328641 | -0.110673 |
|               | 8             | 1           | 0                       | -6.723334 | -3.619456 | -0.162056 |
|               | 9             | 1           | 0                       | -4.297046 | -4.150398 | -0.163949 |
| 20            | 10            | 6           | 0                       | -3.008072 | 0.136757  | -0.056916 |
|               | 11            | 6           | 0                       | -2.303037 | -1.956813 | -0.097565 |
|               | 12            | 7           | 0                       | -1.886483 | -0.673621 | -0.068581 |
|               | 13            | 7           | 0                       | -3.030591 | 1.463669  | -0.025357 |
|               | 14            | 6           | 0                       | -1.957603 | 2.245528  | -0.005175 |
| 25            | 15            | 6           | 0                       | -2.023022 | 3.704907  | 0.043238  |
|               | 16            | 6           | 0                       | -0.688631 | 4.167008  | 0.056784  |
|               | 17            | 6           | 0                       | -3.109376 | 4.569061  | 0.074871  |
|               | 18            | 1           | 0                       | -4.125909 | 4.193277  | 0.064084  |
|               | 19            | 6           | 0                       | -2.822570 | 5.935596  | 0.120630  |
| 30            | 20            | 1           | 0                       | -3.634755 | 6.655452  | 0.146191  |
|               | 21            | 6           | 0                       | -1.507235 | 6.411462  | 0.134793  |
|               | 22            | 1           | 0                       | -1.353687 | 7.482397  | 0.170943  |
|               | 23            | 6           | 0                       | -0.396265 | 5.544376  | 0.103720  |
|               | 24            | 6           | 0                       | 0.152989  | 2.977129  | 0.016052  |
| 35            | 25            | 7           | 0                       | -0.645241 | 1.855817  | -0.019802 |
|               | 26            | 7           | 0                       | 1.479935  | 3.010003  | 0.019905  |
|               | 27            | 6           | 0                       | 2.266784  | 1.935550  | -0.005316 |
|               | 28            | 6           | 0                       | 3.726799  | 2.012666  | 0.006618  |
|               | 29            | 6           | 0                       | 6.439960  | 1.522996  | 0.014122  |
| 40            | 30            | 6           | 0                       | 4.202170  | 0.682637  | -0.022290 |
|               | 31            | 6           | 0                       | 4.580951  | 3.107069  | 0.039951  |
|               | 32            | 6           | 0                       | 5.950563  | 2.833993  | 0.042662  |
|               | 33            | 6           | 0                       | 5.583941  | 0.405189  | -0.018712 |
|               | 34            | 1           | 0                       | 4.194018  | 4.119213  | 0.062408  |
| 45            | 35            | 1           | 0                       | 6.662836  | 3.652835  | 0.067417  |
|               | 36            | 1           | 0                       | 7.513043  | 1.380099  | 0.017852  |
|               | 37            | 6           | 0                       | 3.020227  | -0.166447 | -0.050075 |
|               | 38            | 7           | 0                       | 1.888695  | 0.624199  | -0.038819 |
|               | 39            | 7           | 0                       | 3.053650  | -1.491497 | -0.074446 |
| 50            | 40            | 6           | 0                       | 1.988823  | -2.285251 | -0.091401 |
|               | 41            | 7           | 0                       | 0.660737  | -1.911194 | -0.094644 |
|               | 42            | 7           | 0                       | -1.454001 | -3.012735 | -0.109510 |
|               | 43            | 6           | 0                       | -0.094666 | -3.031574 | -0.103992 |

|    |    |    |   |           |           |           |
|----|----|----|---|-----------|-----------|-----------|
|    | 44 | 6  | 0 | 2.062084  | -3.738332 | -0.100281 |
|    | 45 | 6  | 0 | 1.562999  | -6.467080 | -0.114231 |
|    | 46 | 6  | 0 | 0.729168  | -4.221427 | -0.105952 |
|    | 47 | 6  | 0 | 3.148232  | -4.612633 | -0.090476 |
| 5  | 48 | 6  | 0 | 2.881951  | -5.980021 | -0.096434 |
|    | 49 | 6  | 0 | 0.466175  | -5.602198 | -0.107121 |
|    | 50 | 1  | 0 | 4.162050  | -4.227953 | -0.082403 |
|    | 51 | 1  | 0 | 3.703093  | -6.689457 | -0.098602 |
|    | 52 | 1  | 0 | 1.391084  | -7.538380 | -0.142220 |
| 10 | 53 | 30 | 0 | 0.012967  | -0.006889 | -0.118164 |
|    | 54 | 6  | 0 | -1.384083 | -6.972039 | 1.516668  |
|    | 55 | 1  | 0 | -0.667979 | -7.784667 | 1.642498  |
|    | 56 | 1  | 0 | -2.396739 | -7.376803 | 1.570223  |
|    | 57 | 1  | 0 | -1.245508 | -6.220012 | 2.294263  |
| 15 | 58 | 6  | 0 | 7.969295  | -1.090647 | -0.041429 |
|    | 59 | 1  | 0 | 8.331491  | -0.561044 | -0.924928 |
|    | 60 | 1  | 0 | 8.352491  | -2.112704 | -0.064419 |
|    | 61 | 1  | 0 | 8.322651  | -0.604667 | 0.870279  |
|    | 62 | 6  | 0 | 1.118740  | 7.914757  | 0.179551  |
| 20 | 63 | 1  | 0 | 0.611970  | 8.306185  | -0.704883 |
|    | 64 | 1  | 0 | 2.144632  | 8.288172  | 0.188778  |
|    | 65 | 1  | 0 | 0.616932  | 8.248275  | 1.090194  |
|    | 66 | 6  | 0 | -7.930304 | 1.143506  | -0.061785 |
|    | 67 | 1  | 0 | -8.290979 | 0.663137  | -0.973622 |
| 25 | 68 | 1  | 0 | -8.292498 | 2.173251  | -0.042610 |
|    | 69 | 1  | 0 | -8.305581 | 0.624482  | 0.822576  |
|    | 70 | 16 | 0 | 6.152817  | -1.271142 | -0.054989 |
|    | 71 | 16 | 0 | 1.284430  | 6.097596  | 0.120160  |
|    | 72 | 16 | 0 | -6.110700 | 1.290571  | -0.044319 |
| 30 | 73 | 16 | 0 | -1.217019 | -6.232404 | -0.158205 |
|    | 74 | 1  | 0 | -1.866463 | -3.953123 | -0.116881 |

### Na-Protonated 9b

Standard orientation:

| Center Number | Atomic Number | Atomic Type | Coordinates (Angstroms) |           |           |           |
|---------------|---------------|-------------|-------------------------|-----------|-----------|-----------|
|               |               |             | X                       | Y         | Z         |           |
| 40            | 1             | 6           | 0                       | -4.762658 | 2.977157  | 0.238395  |
|               | 2             | 6           | 0                       | -2.651400 | 4.895820  | 0.227396  |
|               | 3             | 6           | 0                       | -5.018351 | 4.348250  | 0.327350  |
|               | 4             | 6           | 0                       | -3.422547 | 2.565492  | 0.120121  |
|               | 5             | 6           | 0                       | -2.386506 | 3.531404  | 0.122565  |
| 45            | 6             | 6           | 0                       | -3.980923 | 5.295179  | 0.327035  |
|               | 7             | 1           | 0                       | -6.048336 | 4.683889  | 0.393172  |
|               | 8             | 1           | 0                       | -4.226953 | 6.349445  | 0.400850  |
|               | 9             | 1           | 0                       | -1.837267 | 5.611910  | 0.228413  |
|               | 10            | 6           | 0                       | -2.737923 | 1.286167  | 0.002384  |
| 50            | 11            | 6           | 0                       | -1.130406 | 2.812748  | 0.025703  |
|               | 12            | 7           | 0                       | -1.394535 | 1.460903  | -0.040588 |
|               | 13            | 7           | 0                       | -3.335715 | 0.062168  | -0.070456 |
|               | 14            | 6           | 0                       | -2.771193 | -1.176829 | -0.126160 |



|    |    |    |   |           |           |           |
|----|----|----|---|-----------|-----------|-----------|
|    | 15 | 6  | 0 | -3.454894 | -2.460868 | -0.221171 |
|    | 16 | 6  | 0 | -2.411679 | -3.420579 | -0.179682 |
|    | 17 | 6  | 0 | -4.793708 | -2.899483 | -0.359302 |
|    | 18 | 6  | 0 | -5.012492 | -4.283031 | -0.432906 |
| 5  | 19 | 1  | 0 | -6.023499 | -4.658450 | -0.530814 |
|    | 20 | 6  | 0 | -3.963036 | -5.208935 | -0.381571 |
|    | 21 | 1  | 0 | -4.194889 | -6.267318 | -0.443175 |
|    | 22 | 6  | 0 | -2.642074 | -4.789736 | -0.255346 |
|    | 23 | 6  | 0 | -1.159221 | -2.695386 | -0.080741 |
| 10 | 24 | 7  | 0 | -1.423064 | -1.346230 | -0.060009 |
|    | 25 | 7  | 0 | 0.017786  | -3.303603 | -0.005245 |
|    | 26 | 6  | 0 | 1.190406  | -2.689759 | 0.052434  |
|    | 27 | 6  | 0 | 2.452712  | -3.394738 | 0.234594  |
|    | 28 | 6  | 0 | 5.060899  | -4.155992 | 0.655531  |
| 15 | 29 | 6  | 0 | 3.464137  | -2.409917 | 0.273815  |
|    | 30 | 6  | 0 | 2.713693  | -4.749938 | 0.384730  |
|    | 31 | 6  | 0 | 4.045786  | -5.114420 | 0.588086  |
|    | 32 | 6  | 0 | 4.806456  | -2.776498 | 0.511454  |
|    | 33 | 1  | 0 | 1.914561  | -5.481113 | 0.349091  |
| 20 | 34 | 1  | 0 | 4.308024  | -6.161035 | 0.707241  |
|    | 35 | 1  | 0 | 6.072796  | -4.498109 | 0.830827  |
|    | 36 | 6  | 0 | 2.787376  | -1.127088 | 0.072676  |
|    | 37 | 7  | 0 | 1.430701  | -1.344628 | -0.030362 |
|    | 38 | 7  | 0 | 3.414999  | 0.043923  | -0.022060 |
| 25 | 39 | 6  | 0 | 2.814259  | 1.229655  | -0.109723 |
|    | 40 | 7  | 0 | 1.456702  | 1.449610  | -0.052052 |
|    | 41 | 7  | 0 | 0.051091  | 3.415246  | 0.007397  |
|    | 42 | 6  | 0 | 1.222598  | 2.798748  | -0.048975 |
|    | 43 | 6  | 0 | 3.509860  | 2.526188  | -0.196551 |
| 30 | 44 | 6  | 0 | 4.089067  | 5.266551  | -0.095638 |
|    | 45 | 6  | 0 | 2.492190  | 3.506417  | -0.107801 |
|    | 46 | 6  | 0 | 4.853830  | 2.935972  | -0.310042 |
|    | 47 | 6  | 0 | 5.107595  | 4.318548  | -0.233092 |
|    | 48 | 6  | 0 | 2.753089  | 4.870276  | -0.055054 |
| 35 | 49 | 1  | 0 | 6.136666  | 4.652303  | -0.315298 |
|    | 50 | 1  | 0 | 4.347348  | 6.319723  | -0.050817 |
|    | 51 | 30 | 0 | 0.036541  | 0.055088  | -0.120772 |
|    | 52 | 6  | 0 | 7.554514  | -2.495793 | 1.045069  |
|    | 53 | 1  | 0 | 8.338875  | -1.745885 | 1.165269  |
| 40 | 54 | 1  | 0 | 7.835677  | -3.170253 | 0.233533  |
|    | 55 | 1  | 0 | 7.448816  | -3.045277 | 1.982749  |
|    | 56 | 6  | 0 | -6.602334 | 1.814384  | 2.008052  |
|    | 57 | 1  | 0 | -5.767050 | 1.538823  | 2.653178  |
|    | 58 | 1  | 0 | -7.398741 | 1.074101  | 2.106790  |
| 45 | 59 | 1  | 0 | -6.987342 | 2.796848  | 2.284034  |
|    | 60 | 1  | 0 | 1.941645  | 5.585118  | 0.021998  |
|    | 61 | 1  | 0 | -1.814085 | -5.488096 | -0.221887 |
|    | 62 | 6  | 0 | -7.537463 | -2.665560 | -1.058286 |
|    | 63 | 1  | 0 | -7.290481 | -3.162907 | -1.997532 |
| 50 | 64 | 1  | 0 | -8.314067 | -1.920458 | -1.239697 |
|    | 65 | 1  | 0 | -7.899286 | -3.382249 | -0.319445 |
|    | 66 | 6  | 0 | 5.846693  | 0.941003  | -2.037937 |
|    | 67 | 1  | 0 | 5.557193  | 1.618713  | -2.842956 |
|    | 68 | 1  | 0 | 5.065736  | 0.210938  | -1.831098 |

|   |    |    |   |           |           |           |
|---|----|----|---|-----------|-----------|-----------|
|   | 69 | 1  | 0 | 6.762198  | 0.418341  | -2.321991 |
|   | 70 | 16 | 0 | -6.104783 | 1.792726  | 0.238205  |
|   | 71 | 16 | 0 | -6.109702 | -1.718395 | -0.430736 |
|   | 72 | 16 | 0 | 6.053458  | -1.535047 | 0.650100  |
| 5 | 73 | 16 | 0 | 6.276898  | 1.889176  | -0.532488 |
|   | 74 | 1  | 0 | -4.361557 | 0.118827  | -0.071419 |

---

10

### Na-Protonated 9c

15 Standard orientation:

| -----            |                  |                |                         |           |           |           |
|------------------|------------------|----------------|-------------------------|-----------|-----------|-----------|
| Center<br>Number | Atomic<br>Number | Atomic<br>Type | Coordinates (Angstroms) |           |           |           |
|                  |                  |                | X                       | Y         | Z         |           |
| -----            |                  |                |                         |           |           |           |
| 20               | 1                | 6              | 0                       | -3.772536 | -4.728698 | -0.073338 |
|                  | 2                | 6              | 0                       | -5.415188 | -2.361436 | -0.133628 |
|                  | 3                | 6              | 0                       | -5.166443 | -4.806008 | -0.113212 |
|                  | 4                | 6              | 0                       | -3.217801 | -3.455911 | -0.064640 |
|                  | 5                | 6              | 0                       | -4.008489 | -2.286643 | -0.093129 |
| 25               | 6                | 6              | 0                       | -5.965967 | -3.657855 | -0.142716 |
|                  | 7                | 1              | 0                       | -5.652040 | -5.776827 | -0.122091 |
|                  | 8                | 1              | 0                       | -7.040325 | -3.787003 | -0.173433 |
|                  | 9                | 6              | 0                       | -1.822942 | -3.017027 | -0.028256 |
|                  | 10               | 6              | 0                       | -3.073392 | -1.170731 | -0.071136 |
| 30               | 11               | 7              | 0                       | -1.782042 | -1.651276 | -0.033765 |
|                  | 12               | 7              | 0                       | -0.795511 | -3.860783 | 0.008717  |
|                  | 13               | 6              | 0                       | 0.475759  | -3.476544 | 0.033333  |
|                  | 14               | 6              | 0                       | 1.595065  | -4.417240 | 0.091985  |
|                  | 15               | 6              | 0                       | 2.774779  | -3.642236 | 0.102693  |
| 35               | 16               | 6              | 0                       | 1.616838  | -5.804489 | 0.134510  |
|                  | 17               | 1              | 0                       | 0.699026  | -6.380773 | 0.125400  |
|                  | 18               | 6              | 0                       | 2.873809  | -6.411497 | 0.189604  |
|                  | 19               | 1              | 0                       | 2.947979  | -7.493943 | 0.224240  |
|                  | 20               | 6              | 0                       | 4.053647  | -5.659481 | 0.202266  |
| 40               | 21               | 1              | 0                       | 4.995368  | -6.191650 | 0.246820  |
|                  | 22               | 6              | 0                       | 4.044314  | -4.251233 | 0.159767  |
|                  | 23               | 6              | 0                       | 2.341478  | -2.252978 | 0.048745  |
|                  | 24               | 7              | 0                       | 0.965644  | -2.199502 | 0.010478  |
|                  | 25               | 7              | 0                       | 3.166217  | -1.217628 | 0.032437  |
| 45               | 26               | 6              | 0                       | 2.803108  | 0.060120  | -0.002801 |
|                  | 27               | 6              | 0                       | 3.764371  | 1.143722  | -0.068291 |
|                  | 28               | 6              | 0                       | 5.128771  | 3.526597  | -0.269559 |
|                  | 29               | 6              | 0                       | 3.032487  | 2.358314  | -0.100071 |
|                  | 30               | 6              | 0                       | 5.153055  | 1.099920  | -0.138944 |
| 50               | 31               | 6              | 0                       | 5.827878  | 2.313011  | -0.243796 |
|                  | 32               | 6              | 0                       | 3.729865  | 3.582607  | -0.201613 |
|                  | 33               | 1              | 0                       | 5.672014  | 0.148511  | -0.119466 |
|                  | 34               | 1              | 0                       | 6.911510  | 2.329745  | -0.300373 |

|    |    |    |   |           |           |           |
|----|----|----|---|-----------|-----------|-----------|
|    | 35 | 1  | 0 | 5.693357  | 4.449316  | -0.336513 |
|    | 36 | 6  | 0 | 1.634769  | 1.945283  | -0.047938 |
|    | 37 | 7  | 0 | 1.533586  | 0.590085  | 0.006628  |
|    | 38 | 7  | 0 | 0.533433  | 2.749379  | -0.043299 |
| 5  | 39 | 6  | 0 | -0.789573 | 2.415486  | -0.026901 |
|    | 40 | 7  | 0 | -1.226812 | 1.132179  | -0.065000 |
|    | 41 | 7  | 0 | -3.434421 | 0.102947  | -0.075007 |
|    | 42 | 6  | 0 | -2.605229 | 1.140412  | -0.056138 |
|    | 43 | 6  | 0 | -1.913627 | 3.341624  | 0.022403  |
| 10 | 44 | 6  | 0 | -4.491831 | 4.421432  | 0.109794  |
|    | 45 | 6  | 0 | -3.064087 | 2.514707  | -0.008522 |
|    | 46 | 6  | 0 | -2.063236 | 4.737866  | 0.111416  |
|    | 47 | 6  | 0 | -3.362165 | 5.254450  | 0.141307  |
|    | 48 | 6  | 0 | -4.354824 | 3.038281  | 0.036442  |
| 15 | 49 | 1  | 0 | -3.493695 | 6.330910  | 0.184204  |
|    | 50 | 1  | 0 | -5.480026 | 4.868896  | 0.137665  |
|    | 51 | 30 | 0 | -0.129139 | -0.549554 | -0.049980 |
|    | 52 | 6  | 0 | 3.882037  | 6.218170  | -1.231671 |
|    | 53 | 1  | 0 | 4.775268  | 6.543149  | -0.696532 |
| 20 | 54 | 1  | 0 | 3.260534  | 7.090119  | -1.443672 |
|    | 55 | 1  | 0 | 4.147719  | 5.726234  | -2.168249 |
|    | 56 | 6  | 0 | 6.846979  | -4.492517 | 0.270611  |
|    | 57 | 1  | 0 | 6.788610  | -5.084207 | 1.186377  |
|    | 58 | 1  | 0 | 7.768153  | -3.906857 | 0.290197  |
| 25 | 59 | 1  | 0 | 6.863379  | -5.141646 | -0.607216 |
|    | 60 | 1  | 0 | -5.212610 | 2.375223  | 0.014363  |
|    | 61 | 1  | 0 | -3.147187 | -5.613586 | -0.050591 |
|    | 62 | 6  | 0 | -0.693628 | 6.425878  | 1.884423  |
|    | 63 | 1  | 0 | -1.605196 | 6.995646  | 2.069173  |
| 30 | 64 | 1  | 0 | 0.170978  | 7.082211  | 2.001647  |
|    | 65 | 1  | 0 | -0.617031 | 5.593884  | 2.585626  |
|    | 66 | 6  | 0 | -8.096541 | -1.506835 | -0.229386 |
|    | 67 | 1  | 0 | -8.283990 | -2.092281 | -1.131808 |
|    | 68 | 1  | 0 | -8.721653 | -0.612155 | -0.256394 |
| 35 | 69 | 1  | 0 | -8.348503 | -2.083297 | 0.663053  |
|    | 70 | 16 | 0 | 5.508012  | -3.255734 | 0.177085  |
|    | 71 | 16 | 0 | 2.843724  | 5.118886  | -0.202210 |
|    | 72 | 16 | 0 | -0.646480 | 5.829329  | 0.146507  |
|    | 73 | 16 | 0 | -6.383293 | -0.879673 | -0.171831 |
| 40 | 74 | 1  | 0 | 0.701425  | 3.763123  | -0.065857 |

### Na-Protonated 9d

Standard orientation:

| Center Number | Atomic Number | Atomic Type | Coordinates (Angstroms) |          |          |           |
|---------------|---------------|-------------|-------------------------|----------|----------|-----------|
|               |               |             | X                       | Y        | Z        |           |
| 45            | 1             | 6           | 0                       | 4.364730 | 2.930168 | 0.052257  |
|               | 2             | 6           | 0                       | 2.137555 | 4.712280 | -0.035404 |
| 50            | 3             | 6           | 0                       | 4.534346 | 4.317858 | 0.054959  |
|               | 4             | 6           | 0                       | 3.051938 | 2.428727 | -0.017476 |
|               | 5             | 6           | 0                       | 1.959244 | 3.330230 | -0.054693 |

|    |    |    |   |           |           |           |
|----|----|----|---|-----------|-----------|-----------|
|    | 6  | 6  | 0 | 3.440829  | 5.197852  | 0.017060  |
|    | 7  | 1  | 0 | 5.542322  | 4.719207  | 0.081821  |
|    | 8  | 1  | 0 | 3.622242  | 6.267700  | 0.023762  |
|    | 9  | 1  | 0 | 1.277641  | 5.372460  | -0.061679 |
| 5  | 10 | 6  | 0 | 2.442242  | 1.105443  | -0.042539 |
|    | 11 | 6  | 0 | 0.746818  | 2.536242  | -0.081841 |
|    | 12 | 7  | 0 | 1.089795  | 1.201166  | -0.074276 |
|    | 13 | 7  | 0 | 3.102941  | -0.088686 | -0.043220 |
|    | 14 | 6  | 0 | 2.607615  | -1.359370 | -0.033406 |
| 10 | 15 | 6  | 0 | 3.364731  | -2.605901 | -0.057789 |
|    | 16 | 6  | 0 | 2.376927  | -3.622972 | -0.022481 |
|    | 17 | 6  | 0 | 4.728404  | -2.970436 | -0.132945 |
|    | 18 | 6  | 0 | 5.031069  | -4.338633 | -0.171698 |
|    | 19 | 1  | 0 | 6.067329  | -4.651990 | -0.218573 |
| 15 | 20 | 6  | 0 | 4.035431  | -5.323425 | -0.141823 |
|    | 21 | 1  | 0 | 4.328408  | -6.367835 | -0.174714 |
|    | 22 | 6  | 0 | 2.689557  | -4.977733 | -0.063401 |
|    | 23 | 6  | 0 | 1.082654  | -2.970166 | 0.018271  |
|    | 24 | 7  | 0 | 1.270585  | -1.607024 | 0.010320  |
| 20 | 25 | 7  | 0 | -0.060074 | -3.647723 | 0.049951  |
|    | 26 | 6  | 0 | -1.267254 | -3.102997 | 0.056142  |
|    | 27 | 6  | 0 | -2.505526 | -3.878186 | 0.101618  |
|    | 28 | 6  | 0 | -5.116558 | -4.758946 | 0.173615  |
|    | 29 | 6  | 0 | -3.563516 | -2.943757 | 0.088841  |
| 25 | 30 | 6  | 0 | -2.724679 | -5.248454 | 0.150105  |
|    | 31 | 6  | 0 | -4.055615 | -5.670626 | 0.185757  |
|    | 32 | 6  | 0 | -4.907473 | -3.365912 | 0.125079  |
|    | 33 | 1  | 0 | -1.898659 | -5.950068 | 0.159646  |
|    | 34 | 1  | 0 | -4.283231 | -6.731363 | 0.224013  |
| 30 | 35 | 1  | 0 | -6.124909 | -5.151333 | 0.202855  |
|    | 36 | 6  | 0 | -2.939925 | -1.626771 | 0.035896  |
|    | 37 | 7  | 0 | -1.571213 | -1.768481 | 0.018701  |
|    | 38 | 7  | 0 | -3.624149 | -0.489470 | 0.010230  |
|    | 39 | 6  | 0 | -3.070916 | 0.719536  | -0.028952 |
| 35 | 40 | 7  | 0 | -1.741087 | 1.029376  | -0.042924 |
|    | 41 | 7  | 0 | -0.467542 | 3.074341  | -0.097472 |
|    | 42 | 6  | 0 | -1.607190 | 2.400887  | -0.082155 |
|    | 43 | 6  | 0 | -3.852952 | 1.954601  | -0.059817 |
|    | 44 | 6  | 0 | -4.754236 | 4.558072  | -0.125426 |
| 40 | 45 | 6  | 0 | -2.925518 | 3.018812  | -0.093957 |
|    | 46 | 6  | 0 | -5.225715 | 2.162745  | -0.057537 |
|    | 47 | 6  | 0 | -5.658291 | 3.490370  | -0.091410 |
|    | 48 | 6  | 0 | -3.359775 | 4.358911  | -0.127678 |
|    | 49 | 1  | 0 | -5.918467 | 1.329548  | -0.030625 |
| 45 | 50 | 1  | 0 | -6.721242 | 3.710726  | -0.091509 |
|    | 51 | 1  | 0 | -5.154642 | 5.563456  | -0.150442 |
|    | 52 | 30 | 0 | -0.255889 | -0.289111 | -0.053093 |
|    | 53 | 6  | 0 | -3.225706 | 7.170486  | -0.207254 |
|    | 54 | 1  | 0 | -3.839058 | 7.258634  | 0.691779  |
| 50 | 55 | 1  | 0 | -3.848374 | 7.207052  | -1.103461 |
|    | 56 | 1  | 0 | -2.522698 | 8.005317  | -0.234978 |
|    | 57 | 6  | 0 | -7.717182 | -3.214902 | 0.168762  |
|    | 58 | 1  | 0 | -7.768909 | -3.802046 | 1.087959  |
|    | 59 | 1  | 0 | -7.798879 | -3.861970 | -0.706979 |

|    |    |    |   |           |           |           |
|----|----|----|---|-----------|-----------|-----------|
|    | 60 | 1  | 0 | -8.547758 | -2.506374 | 0.158943  |
|    | 61 | 6  | 0 | 6.335256  | 2.048015  | 1.840346  |
|    | 62 | 1  | 0 | 5.547434  | 1.762867  | 2.538793  |
|    | 63 | 1  | 0 | 6.648009  | 3.077313  | 2.020408  |
| 5  | 64 | 1  | 0 | 7.192556  | 1.383929  | 1.967266  |
|    | 65 | 1  | 0 | 1.902059  | -5.721978 | -0.040839 |
|    | 66 | 6  | 0 | 7.373064  | -2.497054 | -1.041204 |
|    | 67 | 1  | 0 | 8.070925  | -1.684609 | -1.251817 |
|    | 68 | 1  | 0 | 7.026866  | -2.929138 | -1.981126 |
| 10 | 69 | 1  | 0 | 7.877910  | -3.246874 | -0.430580 |
|    | 70 | 16 | 0 | -2.177625 | 5.676463  | -0.169901 |
|    | 71 | 16 | 0 | 5.781331  | 1.838327  | 0.100230  |
|    | 72 | 16 | 0 | 5.984366  | -1.720438 | -0.140898 |
|    | 73 | 16 | 0 | -6.217251 | -2.175932 | 0.108803  |
| 15 | 74 | 1  | 0 | 4.125601  | 0.011504  | -0.064938 |

20

### Na-Protonated p-8a

Standard orientation:

| -----  |        |        |                         |           |           |           |
|--------|--------|--------|-------------------------|-----------|-----------|-----------|
| Center | Atomic | Atomic | Coordinates (Angstroms) |           |           |           |
| Number | Number | Type   | X                       | Y         | Z         |           |
| -----  |        |        |                         |           |           |           |
|        | 1      | 6      | 0                       | -3.497276 | -4.357702 | -0.000005 |
| 30     | 2      | 6      | 0                       | -5.177463 | -2.058203 | -0.000001 |
|        | 3      | 6      | 0                       | -4.900854 | -4.483368 | -0.000005 |
|        | 4      | 6      | 0                       | -2.968269 | -3.080242 | -0.000002 |
|        | 5      | 6      | 0                       | -3.790486 | -1.932259 | 0.000000  |
|        | 6      | 6      | 0                       | -5.729000 | -3.338430 | -0.000003 |
| 35     | 7      | 1      | 0                       | -6.806061 | -3.448875 | -0.000004 |
|        | 8      | 1      | 0                       | -5.815790 | -1.181151 | 0.000001  |
|        | 9      | 6      | 0                       | -1.582963 | -2.596167 | -0.000001 |
|        | 10     | 6      | 0                       | -2.900477 | -0.785384 | 0.000002  |
|        | 11     | 7      | 0                       | -1.595096 | -1.222803 | 0.000001  |
| 40     | 12     | 7      | 0                       | -0.529261 | -3.399637 | -0.000003 |
|        | 13     | 6      | 0                       | 0.738422  | -2.983809 | -0.000002 |
|        | 14     | 6      | 0                       | 1.879707  | -3.882712 | -0.000003 |
|        | 15     | 6      | 0                       | 3.032054  | -3.074934 | -0.000003 |
|        | 16     | 6      | 0                       | 1.989687  | -5.277131 | -0.000005 |
| 45     | 17     | 1      | 0                       | 1.105587  | -5.905225 | -0.000005 |
|        | 18     | 6      | 0                       | 3.260089  | -5.829859 | -0.000005 |
|        | 19     | 1      | 0                       | 3.405394  | -6.904545 | -0.000006 |
|        | 20     | 6      | 0                       | 4.419324  | -5.014171 | -0.000005 |
|        | 21     | 6      | 0                       | 4.315416  | -3.614194 | -0.000003 |
| 50     | 22     | 6      | 0                       | 2.561344  | -1.689048 | -0.000001 |
|        | 23     | 7      | 0                       | 1.184391  | -1.685256 | -0.000002 |
|        | 24     | 7      | 0                       | 3.364081  | -0.635827 | -0.000001 |
|        | 25     | 6      | 0                       | 2.959252  | 0.631270  | 0.000000  |

|    |    |    |   |           |           |           |
|----|----|----|---|-----------|-----------|-----------|
|    | 26 | 6  | 0 | 3.853922  | 1.770077  | -0.000004 |
|    | 27 | 6  | 0 | 5.014667  | 4.305297  | -0.000013 |
|    | 28 | 6  | 0 | 3.054090  | 2.935005  | -0.000002 |
|    | 29 | 6  | 0 | 5.250941  | 1.873526  | -0.000011 |
| 5  | 30 | 6  | 0 | 5.817305  | 3.134289  | -0.000015 |
|    | 31 | 6  | 0 | 3.617921  | 4.218518  | -0.000007 |
|    | 32 | 1  | 0 | 5.867696  | 0.981644  | -0.000012 |
|    | 33 | 1  | 0 | 6.893308  | 3.268814  | -0.000020 |
|    | 34 | 6  | 0 | 1.694147  | 2.442765  | 0.000004  |
| 10 | 35 | 7  | 0 | 1.653097  | 1.093837  | 0.000006  |
|    | 36 | 7  | 0 | 0.569285  | 3.215026  | 0.000006  |
|    | 37 | 6  | 0 | -0.740937 | 2.853163  | 0.000007  |
|    | 38 | 7  | 0 | -1.140598 | 1.560214  | 0.000004  |
|    | 39 | 7  | 0 | -3.316637 | 0.478764  | 0.000004  |
| 15 | 40 | 6  | 0 | -2.521836 | 1.537893  | 0.000005  |
|    | 41 | 6  | 0 | -1.866302 | 3.755840  | 0.000009  |
|    | 42 | 6  | 0 | -4.440044 | 4.832896  | 0.000012  |
|    | 43 | 6  | 0 | -3.008603 | 2.915942  | 0.000008  |
|    | 44 | 6  | 0 | -2.018876 | 5.144782  | 0.000011  |
| 20 | 45 | 6  | 0 | -3.304440 | 5.677185  | 0.000013  |
|    | 46 | 6  | 0 | -4.292171 | 3.434705  | 0.000010  |
|    | 47 | 1  | 0 | -1.168384 | 5.821697  | 0.000012  |
|    | 48 | 1  | 0 | -3.427945 | 6.752576  | 0.000015  |
|    | 49 | 30 | 0 | 0.026186  | -0.085417 | 0.000006  |
| 25 | 50 | 8  | 0 | 5.711387  | 5.463798  | -0.000018 |
|    | 51 | 8  | 0 | -5.712952 | 5.279702  | 0.000013  |
|    | 52 | 8  | 0 | -5.362931 | -5.752488 | -0.000008 |
|    | 53 | 8  | 0 | 5.588076  | -5.692406 | -0.000005 |
|    | 54 | 6  | 0 | -5.966101 | 6.685008  | 0.000022  |
| 30 | 55 | 1  | 0 | -5.555577 | 7.162983  | 0.896540  |
|    | 56 | 1  | 0 | -7.050671 | 6.787305  | 0.000026  |
|    | 57 | 1  | 0 | -5.555584 | 7.162992  | -0.896495 |
|    | 58 | 6  | 0 | 5.002941  | 6.699312  | -0.000016 |
|    | 59 | 1  | 0 | 4.379962  | 6.801199  | -0.896824 |
| 35 | 60 | 1  | 0 | 5.764378  | 7.478566  | -0.000020 |
|    | 61 | 1  | 0 | 4.379970  | 6.801200  | 0.896798  |
|    | 62 | 6  | 0 | 6.811286  | -4.959698 | -0.000002 |
|    | 63 | 1  | 0 | 6.900057  | -4.334061 | 0.895651  |
|    | 64 | 1  | 0 | 6.900061  | -4.334060 | -0.895654 |
| 40 | 65 | 1  | 0 | 7.603918  | -5.707359 | -0.000001 |
|    | 66 | 6  | 0 | -6.770864 | -5.985331 | -0.000008 |
|    | 67 | 1  | 0 | -7.243496 | -5.567307 | 0.895957  |
|    | 68 | 1  | 0 | -6.889406 | -7.068427 | -0.000009 |
|    | 69 | 1  | 0 | -7.243497 | -5.567304 | -0.895971 |
| 45 | 70 | 1  | 0 | 5.182855  | -2.967020 | -0.000003 |
|    | 71 | 1  | 0 | -2.875085 | -5.244965 | -0.000006 |
|    | 72 | 1  | 0 | -5.168649 | 2.797499  | 0.000009  |
|    | 73 | 1  | 0 | 3.007458  | 5.114456  | -0.000006 |
|    | 74 | 1  | 0 | 0.737129  | 4.213813  | 0.000006  |

---

### Nb-Protonated p-8b

Standard orientation:

| -----  |        |        |                         |           |           |           |
|--------|--------|--------|-------------------------|-----------|-----------|-----------|
| Center | Atomic | Atomic | Coordinates (Angstroms) |           |           |           |
| Number | Number | Type   | X                       | Y         | Z         |           |
| -----  |        |        |                         |           |           |           |
| 5      | 1      | 6      | 0                       | -4.869875 | -2.739634 | 0.000074  |
|        | 2      | 6      | 0                       | -2.911798 | -4.804377 | 0.000042  |
|        | 3      | 6      | 0                       | -5.247501 | -4.093954 | 0.000165  |
|        | 4      | 6      | 0                       | -3.517748 | -2.441308 | -0.000042 |
|        | 5      | 6      | 0                       | -2.530654 | -3.459783 | -0.000060 |
| 10     | 6      | 6      | 0                       | -4.267830 | -5.115422 | 0.000150  |
|        | 7      | 6      | 0                       | -2.808547 | -1.164798 | -0.000146 |
|        | 8      | 6      | 0                       | -1.271526 | -2.757245 | -0.000180 |
|        | 9      | 7      | 0                       | -1.449548 | -1.416345 | -0.000222 |
|        | 10     | 7      | 0                       | -3.413298 | 0.014135  | -0.000103 |
| 15     | 11     | 6      | 0                       | -2.787129 | 1.186298  | -0.000104 |
|        | 12     | 6      | 0                       | -3.478729 | 2.476418  | 0.000063  |
|        | 13     | 6      | 0                       | -2.469401 | 3.463811  | 0.000081  |
|        | 14     | 6      | 0                       | -4.823278 | 2.804883  | 0.000210  |
|        | 15     | 1      | 0                       | -5.606003 | 2.055422  | 0.000206  |
| 20     | 16     | 6      | 0                       | -5.161062 | 4.171843  | 0.000366  |
|        | 17     | 6      | 0                       | -4.155386 | 5.164361  | 0.000380  |
|        | 18     | 6      | 0                       | -2.805557 | 4.814598  | 0.000245  |
|        | 19     | 6      | 0                       | -1.195820 | 2.761320  | -0.000077 |
|        | 20     | 7      | 0                       | -1.433745 | 1.402704  | -0.000180 |
| 25     | 21     | 7      | 0                       | -0.015823 | 3.370848  | -0.000052 |
|        | 22     | 6      | 0                       | 1.161227  | 2.749614  | -0.000090 |
|        | 23     | 6      | 0                       | 2.438169  | 3.444705  | 0.000049  |
|        | 24     | 6      | 0                       | 5.131023  | 4.136469  | 0.000287  |
|        | 25     | 6      | 0                       | 3.439246  | 2.455953  | 0.000022  |
| 30     | 26     | 6      | 0                       | 2.779512  | 4.800954  | 0.000203  |
|        | 27     | 6      | 0                       | 4.124335  | 5.134034  | 0.000314  |
|        | 28     | 6      | 0                       | 4.795237  | 2.774054  | 0.000146  |
|        | 29     | 1      | 0                       | 2.012614  | 5.567736  | 0.000230  |
|        | 30     | 1      | 0                       | 4.447110  | 6.169382  | 0.000428  |
| 35     | 31     | 6      | 0                       | 2.743357  | 1.169071  | -0.000131 |
|        | 32     | 7      | 0                       | 1.387335  | 1.392772  | -0.000190 |
|        | 33     | 7      | 0                       | 3.360945  | -0.005947 | -0.000135 |
|        | 34     | 6      | 0                       | 2.747068  | -1.183144 | -0.000173 |
|        | 35     | 7      | 0                       | 1.384494  | -1.422582 | -0.000227 |
| 40     | 36     | 7      | 0                       | -0.038769 | -3.332960 | -0.000179 |
|        | 37     | 6      | 0                       | 1.199719  | -2.761609 | -0.000195 |
|        | 38     | 6      | 0                       | 3.443913  | -2.463140 | -0.000091 |
|        | 39     | 6      | 0                       | 4.169214  | -5.136780 | 0.000065  |
|        | 40     | 6      | 0                       | 2.451956  | -3.471042 | -0.000103 |
| 45     | 41     | 6      | 0                       | 4.804172  | -2.768133 | 0.000003  |
|        | 42     | 6      | 0                       | 5.162572  | -4.122054 | 0.000077  |
|        | 43     | 6      | 0                       | 2.822626  | -4.825884 | -0.000019 |
|        | 44     | 1      | 0                       | 4.506133  | -6.167314 | 0.000125  |
|        | 45     | 30     | 0                       | -0.025365 | 0.010911  | -0.000960 |
| 50     | 46     | 1      | 0                       | 2.090012  | -5.628692 | -0.000023 |
|        | 47     | 1      | 0                       | -5.628571 | -1.965901 | 0.000094  |
|        | 48     | 1      | 0                       | -2.035777 | 5.578803  | 0.000262  |
|        | 49     | 1      | 0                       | -2.185759 | -5.613268 | 0.000037  |
|        | 50     | 1      | 0                       | 5.543050  | 1.991682  | 0.000127  |

|    |   |   |           |           |           |
|----|---|---|-----------|-----------|-----------|
| 51 | 1 | 0 | 5.537184  | -1.971937 | 0.000016  |
| 52 | 8 | 0 | 6.397138  | 4.611229  | 0.000405  |
| 53 | 8 | 0 | 6.431849  | -4.579842 | 0.000163  |
| 54 | 6 | 0 | 7.479957  | 3.684913  | 0.000413  |
| 55 | 1 | 0 | 7.463055  | 3.052961  | -0.895297 |
| 56 | 1 | 0 | 8.386828  | 4.289052  | 0.000530  |
| 57 | 1 | 0 | 7.462919  | 3.052818  | 0.896020  |
| 58 | 6 | 0 | 7.505002  | -3.638824 | 0.000187  |
| 59 | 1 | 0 | 8.418241  | -4.232802 | 0.000257  |
| 60 | 1 | 0 | 7.478557  | -3.008380 | -0.895835 |
| 61 | 1 | 0 | 7.478461  | -3.008317 | 0.896161  |
| 62 | 1 | 0 | -4.568239 | -6.155384 | 0.000225  |
| 63 | 8 | 0 | -6.576743 | -4.322876 | 0.000271  |
| 64 | 6 | 0 | -7.060539 | -5.666515 | 0.000339  |
| 65 | 1 | 0 | -8.146974 | -5.586578 | 0.000386  |
| 66 | 1 | 0 | -6.735359 | -6.206205 | -0.896122 |
| 67 | 1 | 0 | -6.735278 | -6.206143 | 0.896808  |
| 68 | 1 | 0 | -4.428194 | 6.212181  | 0.000495  |
| 69 | 8 | 0 | -6.486725 | 4.435850  | 0.000486  |
| 70 | 6 | 0 | -6.928793 | 5.792501  | 0.000793  |
| 71 | 1 | 0 | -6.586576 | 6.322978  | 0.896595  |
| 72 | 1 | 0 | -6.586869 | 6.323289  | -0.894937 |
| 73 | 1 | 0 | -8.017468 | 5.747041  | 0.000961  |
| 74 | 1 | 0 | -0.040217 | -4.345917 | -0.000136 |

-----

### Nc-Protonated p-8c

Standard orientation:

| Center<br>Number | Atomic<br>Number | Atomic<br>Type | Coordinates (Angstroms) |           |           |
|------------------|------------------|----------------|-------------------------|-----------|-----------|
|                  |                  |                | X                       | Y         | Z         |
| 1                | 6                | 0              | -2.865704               | -5.088304 | 0.000481  |
| 2                | 6                | 0              | -4.839713               | -3.022992 | 0.000356  |
| 3                | 6                | 0              | -4.213812               | -5.394668 | 0.000730  |
| 4                | 6                | 0              | -2.491276               | -3.735033 | 0.000138  |
| 5                | 6                | 0              | -3.479464               | -2.724673 | 0.000080  |
| 6                | 6                | 0              | -5.203537               | -4.376844 | 0.000671  |
| 7                | 1                | 0              | -4.554044               | -6.424086 | 0.000984  |
| 8                | 6                | 0              | -1.235302               | -3.028819 | -0.000178 |
| 9                | 6                | 0              | -2.777469               | -1.444645 | -0.000255 |
| 10               | 7                | 0              | -1.413753               | -1.690991 | -0.000393 |
| 11               | 7                | 0              | 0.000040                | -3.605431 | -0.000112 |
| 12               | 6                | 0              | 1.235370                | -3.028792 | -0.000173 |
| 13               | 6                | 0              | 2.491361                | -3.734979 | 0.000117  |
| 14               | 6                | 0              | 3.479528                | -2.724597 | 0.000071  |
| 15               | 6                | 0              | 2.865819                | -5.088242 | 0.000428  |
| 16               | 1                | 0              | 2.136021                | -5.893515 | 0.000479  |



|    |    |    |   |           |           |           |
|----|----|----|---|-----------|-----------|-----------|
|    | 17 | 6  | 0 | 4.213935  | -5.394575 | 0.000663  |
|    | 18 | 1  | 0 | 4.554189  | -6.423986 | 0.000894  |
|    | 19 | 6  | 0 | 5.203638  | -4.376730 | 0.000618  |
|    | 20 | 6  | 0 | 4.839784  | -3.022886 | 0.000331  |
| 5  | 21 | 6  | 0 | 2.777503  | -1.444583 | -0.000237 |
|    | 22 | 7  | 0 | 1.413791  | -1.690960 | -0.000360 |
|    | 23 | 7  | 0 | 3.385552  | -0.270071 | -0.000237 |
|    | 24 | 6  | 0 | 2.768260  | 0.910269  | -0.000331 |
|    | 25 | 6  | 0 | 3.457001  | 2.187244  | -0.000050 |
| 10 | 26 | 6  | 0 | 4.128667  | 4.886502  | 0.000456  |
|    | 27 | 6  | 0 | 2.461036  | 3.182258  | -0.000084 |
|    | 28 | 6  | 0 | 4.811292  | 2.540115  | 0.000259  |
|    | 29 | 6  | 0 | 5.133967  | 3.886828  | 0.000495  |
|    | 30 | 6  | 0 | 2.768771  | 4.540070  | 0.000180  |
| 15 | 31 | 1  | 0 | 5.585147  | 1.780308  | 0.000303  |
|    | 32 | 1  | 0 | 6.166788  | 4.217614  | 0.000720  |
|    | 33 | 6  | 0 | 1.176397  | 2.479932  | -0.000390 |
|    | 34 | 7  | 0 | 1.408375  | 1.127663  | -0.000524 |
|    | 35 | 7  | 0 | -0.000036 | 3.099806  | -0.000369 |
| 20 | 36 | 6  | 0 | -1.176454 | 2.479905  | -0.000402 |
|    | 37 | 7  | 0 | -1.408400 | 1.127631  | -0.000526 |
|    | 38 | 7  | 0 | -3.385545 | -0.270148 | -0.000262 |
|    | 39 | 6  | 0 | -2.768280 | 0.910205  | -0.000355 |
|    | 40 | 6  | 0 | -2.461109 | 3.182200  | -0.000120 |
| 25 | 41 | 6  | 0 | -5.134055 | 3.886707  | 0.000415  |
|    | 42 | 6  | 0 | -3.457050 | 2.187164  | -0.000094 |
|    | 43 | 6  | 0 | -2.768875 | 4.540005  | 0.000130  |
|    | 44 | 6  | 0 | -4.128779 | 4.886405  | 0.000385  |
|    | 45 | 6  | 0 | -4.811348 | 2.540003  | 0.000193  |
| 30 | 46 | 1  | 0 | -6.166884 | 4.217469  | 0.000622  |
|    | 47 | 30 | 0 | 0.000003  | -0.260240 | -0.002212 |
|    | 48 | 1  | 0 | -5.585185 | 1.780178  | 0.000229  |
|    | 49 | 1  | 0 | -2.135887 | -5.893561 | 0.000543  |
|    | 50 | 1  | 0 | 5.569581  | -2.223686 | 0.000302  |
| 35 | 51 | 1  | 0 | -5.569527 | -2.223809 | 0.000320  |
|    | 52 | 8  | 0 | 6.473707  | -4.828110 | 0.000868  |
|    | 53 | 8  | 0 | -6.473597 | -4.828252 | 0.000941  |
|    | 54 | 6  | 0 | -7.544406 | -3.882897 | 0.000918  |
|    | 55 | 1  | 0 | -7.515600 | -3.253164 | -0.895277 |
| 40 | 56 | 1  | 0 | -8.459142 | -4.474378 | 0.001150  |
|    | 57 | 1  | 0 | -7.515353 | -3.252842 | 0.896879  |
|    | 58 | 6  | 0 | 7.544495  | -3.882730 | 0.000875  |
|    | 59 | 1  | 0 | 8.459244  | -4.474191 | 0.001104  |
|    | 60 | 1  | 0 | 7.515683  | -3.252980 | -0.895309 |
| 45 | 61 | 1  | 0 | 7.515419  | -3.252694 | 0.896848  |
|    | 62 | 1  | 0 | 1.979857  | 5.280979  | 0.000163  |
|    | 63 | 1  | 0 | -1.979978 | 5.280932  | 0.000118  |
|    | 64 | 8  | 0 | 4.593762  | 6.155395  | 0.000708  |
|    | 65 | 8  | 0 | -4.593904 | 6.155287  | 0.000619  |
| 50 | 66 | 6  | 0 | 3.659242  | 7.232093  | 0.000682  |
|    | 67 | 1  | 0 | 3.027540  | 7.210041  | 0.896271  |
|    | 68 | 1  | 0 | 4.257161  | 8.143004  | 0.000880  |
|    | 69 | 1  | 0 | 3.027823  | 7.210244  | -0.895113 |
|    | 70 | 6  | 0 | -3.659409 | 7.232007  | 0.000618  |

|    |   |   |           |           |           |
|----|---|---|-----------|-----------|-----------|
| 71 | 1 | 0 | -4.257350 | 8.142904  | 0.000816  |
| 72 | 1 | 0 | -3.027721 | 7.209962  | 0.896218  |
| 73 | 1 | 0 | -3.027975 | 7.210182  | -0.895166 |
| 74 | 1 | 0 | 0.000051  | -4.618323 | 0.000069  |

**Nc-Protonated p-8d**

Standard orientation:

| Center Number | Atomic Number | Atomic Type | Coordinates (Angstroms) |           |           |
|---------------|---------------|-------------|-------------------------|-----------|-----------|
|               |               |             | X                       | Y         | Z         |
| 1             | 6             | 0           | 5.340968                | -2.156463 | 0.000525  |
| 2             | 6             | 0           | 3.628642                | -4.427565 | 0.000405  |
| 3             | 6             | 0           | 5.869547                | -3.458414 | 0.001087  |
| 4             | 6             | 0           | 3.957651                | -2.015150 | -0.000117 |
| 5             | 6             | 0           | 3.096239                | -3.139332 | -0.000186 |
| 6             | 6             | 0           | 5.011913                | -4.583420 | 0.001020  |
| 7             | 6             | 0           | 3.065902                | -0.870873 | -0.000705 |
| 8             | 6             | 0           | 1.733808                | -2.638243 | -0.000786 |
| 9             | 7             | 0           | 1.773931                | -1.250246 | -0.001080 |
| 10            | 7             | 0           | 3.456231                | 0.432773  | -0.000585 |
| 11            | 6             | 0           | 2.703996                | 1.570903  | -0.000650 |
| 12            | 6             | 0           | 3.214822                | 2.917055  | 0.000021  |
| 13            | 6             | 0           | 2.067539                | 3.743155  | -0.000007 |
| 14            | 6             | 0           | 4.496940                | 3.490877  | 0.000731  |
| 15            | 1             | 0           | 5.402738                | 2.889156  | 0.000789  |
| 16            | 6             | 0           | 4.597406                | 4.869648  | 0.001367  |
| 17            | 1             | 0           | 5.565009                | 5.359934  | 0.001916  |
| 18            | 6             | 0           | 3.442584                | 5.696357  | 0.001348  |
| 19            | 6             | 0           | 2.159274                | 5.133184  | 0.000668  |
| 20            | 6             | 0           | 0.907564                | 2.858813  | -0.000681 |
| 21            | 7             | 0           | 1.352879                | 1.548057  | -0.001050 |
| 22            | 7             | 0           | -0.346158               | 3.287230  | -0.000631 |
| 23            | 6             | 0           | -1.420857               | 2.504466  | -0.000794 |
| 24            | 6             | 0           | -2.787024               | 2.995107  | -0.000249 |
| 25            | 6             | 0           | -5.558105               | 3.254749  | 0.000874  |
| 26            | 6             | 0           | -3.622014               | 1.861991  | -0.000271 |
| 27            | 6             | 0           | -3.339384               | 4.280962  | 0.000365  |
| 28            | 6             | 0           | -4.719759               | 4.398112  | 0.000899  |
| 29            | 6             | 0           | -5.010513               | 1.962488  | 0.000301  |
| 30            | 1             | 0           | -2.704428               | 5.160927  | 0.000413  |
| 31            | 1             | 0           | -5.200835               | 5.370675  | 0.001364  |
| 32            | 6             | 0           | -2.736107               | 0.696274  | -0.000853 |
| 33            | 7             | 0           | -1.435139               | 1.125192  | -0.001142 |
| 34            | 7             | 0           | -3.176101               | -0.559974 | -0.000779 |
| 35            | 6             | 0           | -2.387767               | -1.629841 | -0.000873 |
| 36            | 7             | 0           | -1.016069               | -1.658697 | -0.001252 |
| 37            | 7             | 0           | 0.656879                | -3.409556 | -0.000739 |
| 38            | 6             | 0           | -0.598977               | -2.972015 | -0.000861 |
| 39            | 6             | 0           | -2.891984               | -3.005219 | -0.000210 |
| 40            | 6             | 0           | -3.194004               | -5.752524 | 0.001146  |
| 41            | 6             | 0           | -1.761000               | -3.842450 | -0.000212 |

|    |    |    |   |           |           |           |
|----|----|----|---|-----------|-----------|-----------|
|    | 42 | 6  | 0 | -4.189046 | -3.510186 | 0.000476  |
|    | 43 | 6  | 0 | -4.331641 | -4.906722 | 0.001146  |
|    | 44 | 6  | 0 | -1.909209 | -5.233764 | 0.000495  |
|    | 45 | 1  | 0 | -3.367094 | -6.823650 | 0.001689  |
| 5  | 46 | 30 | 0 | 0.147103  | -0.060490 | -0.003988 |
|    | 47 | 1  | 0 | -1.042770 | -5.887031 | 0.000531  |
|    | 48 | 1  | 0 | 6.036124  | -1.321708 | 0.000612  |
|    | 49 | 1  | 0 | 1.259126  | 5.734935  | 0.000660  |
|    | 50 | 1  | 0 | 2.973958  | -5.292985 | 0.000385  |
| 10 | 51 | 8  | 0 | 3.699459  | 7.019860  | 0.002030  |
|    | 52 | 6  | 0 | 2.605587  | 7.937440  | 0.002189  |
|    | 53 | 1  | 0 | 3.055961  | 8.930030  | 0.002863  |
|    | 54 | 1  | 0 | 1.987699  | 7.814400  | -0.895027 |
|    | 55 | 1  | 0 | 1.987147  | 7.813430  | 0.898892  |
| 15 | 56 | 1  | 0 | -5.624224 | 1.070433  | 0.000300  |
|    | 57 | 1  | 0 | -5.038752 | -2.839074 | 0.000486  |
|    | 58 | 8  | 0 | -6.882318 | 3.524691  | 0.001447  |
|    | 59 | 8  | 0 | -5.518000 | -5.553712 | 0.001839  |
|    | 60 | 6  | 0 | -7.807656 | 2.440720  | 0.001459  |
| 20 | 61 | 1  | 0 | -7.690718 | 1.819701  | 0.897891  |
|    | 62 | 1  | 0 | -8.797194 | 2.898466  | 0.001942  |
|    | 63 | 1  | 0 | -7.691352 | 1.820223  | -0.895417 |
|    | 64 | 6  | 0 | -6.721099 | -4.789421 | 0.001951  |
|    | 65 | 1  | 0 | -7.532333 | -5.517841 | 0.002591  |
| 25 | 66 | 1  | 0 | -6.791665 | -4.161471 | 0.898392  |
|    | 67 | 1  | 0 | -6.792350 | -4.162289 | -0.895007 |
|    | 68 | 1  | 0 | 5.430608  | -5.582423 | 0.001465  |
|    | 69 | 8  | 0 | 7.218422  | -3.530143 | 0.001679  |
|    | 70 | 6  | 0 | 7.851846  | -4.810304 | 0.002270  |
| 30 | 71 | 1  | 0 | 8.922492  | -4.605386 | 0.002673  |
|    | 72 | 1  | 0 | 7.588464  | -5.382492 | 0.899438  |
|    | 73 | 1  | 0 | 7.589225  | -5.382943 | -0.894834 |
|    | 74 | 1  | 0 | 4.459927  | 0.580296  | -0.000229 |

---

35

40
